# Supplementary material for: Thermodynamics of vivianite-group arsenates M3(AsO4)2 ⋅ 8H2O (M is Ni, Co, Mg, Zn, Cu) and chemical variability in the natural arsenates of this group
Source: Copernicus journal article supplement (doi:10.5194/ejm-36-31-2024), 2024-01-08
Supplement: Supplementary file 1 [file EMP-all-data.xlsx]

## Sheet: all
		NiO	CoO	ZnO	MnO	FeO	CuO	MgO	CaO	PbO	As2O5	P2O5	V2O5	SO3	SiO2	Al2O3	K2O	total		Ni	Co	Zn	Mn	Fe	Cu	Mg	Ca	Pb	As	P	V	S	Si	Al	K		sumM2+		Ni	Co	Zn	Mn	Fe	Cu	Mg	Ca	Pb	As	P
Sejkora: 155 / 1 . ; RO50	Přísečnice	6.953	2.817	0.061	3.396	23.246	0	0.324	0.094	0	41.439	0	0	0	0	0	0	78.33		0.093088	0.0375938	0.000749575	0.0478732	0.323551	0	0.00803882	0.00167625	0	0.36059	0	0	0	0	0	0		0.510895		0.546617	0.220753	0.00440155	0.281114	1.89991	0	0.0472044	0.00984305	0	2.1174	0
Sejkora: 156 / 1 . ; RO50	Přísečnice	7.382	2.479	0	3.303	23.821	0	0.397	0.059	0	42.155	0	0	0	0	0	0	79.596		0.0988315	0.0330831	0	0.0465622	0.331555	0	0.00985004	0.00105212	0	0.36682	0	0	0	0	0	0		0.519881		0.570312	0.190907	0	0.268689	1.91325	0	0.0568401	0.00607129	0	2.11675	0
Sejkora: 157 / 1 . ; RO50	Přísečnice	6.718	2.686	0	3.749	24.282	0	0.414	0.052	0	43.67	0.176	0	0	0.08	0	0	81.827		0.0899417	0.0358455	0	0.0528494	0.337971	0	0.0102718	0.00092729	0	0.380003	0.00247984	0	0	0.00105147	0	0		0.52688		0.512119	0.204101	0	0.300919	1.92437	0	0.0584868	0.0052799	0	2.1637	0.01412
Sejkora: 158 / 1 . ; RO50	Přísečnice	7.211	2.654	0	3.553	24.273	0.174	0.543	0.143	0	39.552	0.054	0	0	0.181	0.074	0	78.412		0.0965421	0.0354185	0	0.0500864	0.337846	0.00218743	0.0134725	0.00255005	0	0.34417	0.00076086	0	0	0.00237896	0.00145153	0		0.535553		0.540799	0.198403	0	0.280569	1.89251	0.0122533	0.0754686	0.0142846	0	1.92793	0.0042621
Sejkora: 159 / 1 . ; RO50	Přísečnice	7.668	2.095	0.074	3.437	23.572	0	0.373	0.106	0	41.27	0.137	0	0	1.133	0.527	0	80.392		0.10266	0.0279585	0.000909321	0.0484512	0.328089	0	0.00925457	0.00189024	0	0.359119	0.00193033	0	0	0.0148915	0.0103373	0		0.517323		0.595337	0.162134	0.00527323	0.280973	1.90262	0	0.0536681	0.0109617	0	2.08256	0.0111942
Sejkora: 35 / 1 . ; LVR806	Michalovy Hory	3.929	12.716	21.274	0.294	0	0	0	0	0	40.633	0	0	0	0	0.106	0	78.952		0.0526021	0.169699	0.261418	0.0041445	0	0	0	0	0	0.353576	0	0	0	0	0.00207922	0		0.487863		0.323464	1.04352	1.60753	0.0254856	0	0	0	0	0	2.17423	0
Sejkora: 36 / 1 . ; LVR806	Michalovy Hory	4.397	13.869	20.574	0.311	0	0	0.056	0	0	39.646	0	0	0	0	0.109	0	78.962		0.0588678	0.185086	0.252816	0.00438415	0	0	0.00138943	0	0	0.344988	0	0	0	0	0.00213807	0		0.502544		0.351419	1.1049	1.50922	0.0261717	0	0	0.00829436	0	0	2.05945	0
Sejkora: 37 / 1 . ; LVR806	Michalovy Hory	4.645	14.544	20.495	0.319	0	0	0	0	0	39.998	0	0	0	0	0.113	0	80.114		0.0621881	0.194094	0.251845	0.00449692	0	0	0	0	0	0.348051	0	0	0	0	0.00221653	0		0.512624		0.363939	1.13589	1.47386	0.0263171	0	0	0	0	0	2.03688	0
Sejkora: 182 / 1 . ; Jach673	Jáchymov - Plavno	26.9	6.814	0.146	0	0	0.095	1.881	0.599	0	39.102	0	0	0	0.08	0.075	0	75.692		0.360142	0.0909351	0.00179407	0	0	0.00119429	0.0466698	0.0106817	0	0.340254	0	0	0	0.00105147	0.00147115	0		0.500735		2.15768	0.544809	0.0107486	0	0	0.0071552	0.279608	0.0639959	0	2.03853	0
Sejkora: 183 / 1 . ; Jach673	Jáchymov - Plavno	28.077	6.956	0	0	0.062	0	1.553	0.437	0	40.287	0	0	0	0.557	0.101	0	78.03		0.3759	0.0928301	0	0	0.000862952	0	0.0385318	0.0077928	0	0.350566	0	0	0	0.00732088	0.00198115	0		0.508125		2.21934	0.548075	0	0	0.00509492	0	0.227494	0.0460092	0	2.06976	0
Sejkora: 184 / 1 . ; Jach673	Jáchymov - Plavno	26.257	7.266	0.227	0.196	0.099	0	1.555	0.394	0	38.296	0	0	0	0	0.051	0	74.341		0.351533	0.0969671	0.0027894	0.002763	0.00137794	0	0.0385814	0.007026	0	0.333241	0	0	0	0	0.00100038	0		0.494012		2.13476	0.588855	0.0169393	0.0167789	0.00836785	0	0.234294	0.042667	0	2.02368	0
Sejkora: 131 / 1 . ; Dy760	Svatá Anna near Mariánské Lázně	8.079	17.36	0	5.403	5.45106	0	2.628	0	0	40.224	0	0.138	0	0.141	0	0	79.4241		0.108163	0.231675	0	0.0761657	0.075871	0	0.0652038	0	0	0.350017	0	0.00151748	0	0.00185322	0	0		0.557078		0.582484	1.24762	0	0.410171	0.408583	0	0.351138	0	0	1.88493	0
Sejkora: 132 / 1 . ; Dy760	Svatá Anna near Mariánské Lázně	8.116	15.199	0	5.597	5.80828	0.269	2.941	0	0	40.056	0	0.188	0.249	0.115	0	0	78.5383		0.108658	0.202836	0	0.0789006	0.080843	0.00338172	0.0729697	0	0	0.348556	0	0.0020673	0.00311008	0.00151149	0	0		0.547589		0.595292	1.11125	0	0.432262	0.442903	0.0185269	0.399769	0	0	1.90958	0
Sejkora: 133 / 1 . ; Dy760	Svatá Anna near Mariánské Lázně	9.333	14.486	0	5.379	5.50324	0	3.091	0	0	39.579	0.101	0.123	0.151	0	0	0	77.7462		0.124952	0.19332	0	0.0758274	0.0765974	0	0.0766914	0	0	0.344405	0.00142309	0.00135254	0.00188603	0	0	0		0.547388		0.684807	1.05951	0	0.415577	0.419797	0	0.420312	0	0	1.88753	0.00779935
Sejkora: 134 / 1 . ; Dy760	Svatá Anna near Mariánské Lázně	9.098	15.744	0	4.685	8.24677	0	2.119	0	0	40.624	0.097	0.071	0.127	0.103	0	0	80.9148		0.121806	0.210109	0	0.0660441	0.114783	0	0.0525749	0	0	0.353498	0.00136673	0.000780735	0.00158627	0.00135377	0	0		0.565317		0.646393	1.115	0	0.35048	0.609127	0	0.279002	0	0	1.87593	0.00725291
Sejkora: 186 / 1 . ; RO80	Přísečnice	30.857	4.392	0.169	0.072	0.101679	0.09	0.18	0.127	0	38.858	0	0.14	0.156	0.115	0	0	75.2577		0.413119	0.0586127	0.00207669	0.00101498	0.00141522	0.00113143	0.00446601	0.00226473	0	0.338131	0	0.00153948	0.00194849	0.00151149	0	0		0.481836		2.57216	0.364934	0.0129299	0.00631945	0.00881144	0.00704449	0.0278062	0.0141006	0	2.10527	0
Sejkora: 187 / 1 . ; RO80	Přísečnice	30.312	4.333	0.375	0.086	0.224953	0.207	0.159	0.094	0	36.958	0	0.1	0.15	0.385	0.105	0	73.489		0.405822	0.0578253	0.00460805	0.00121234	0.00313102	0.00260229	0.00394498	0.00167625	0	0.321598	0	0.00109963	0.00187354	0.00506022	0.00205961	0		0.479146		2.54091	0.362052	0.0288516	0.0075906	0.0196038	0.0162933	0.0247001	0.0104953	0	2.01357	0
Sejkora: 188 / 1 . ; RO80	Přísečnice	31	4.532	0.377	0	0.161966	0.307	0.097	0.081	0	38.026	0	0.828	0	0.345	0.083	0	75.838		0.415033	0.060481	0.00463262	0	0.00225434	0.00385943	0.00240669	0.00144443	0	0.330891	0	0.0091049	0	0.00453448	0.00162807	0		0.488667		2.54795	0.371302	0.0284403	0	0.0138397	0.0236936	0.014775	0.00886758	0	2.03139	0
Sejkora: 189 / 1 . ; RO80	Přísečnice	30.531	4.246	0.284	0.061	0.166465	0	0.054	0.082	0	38.397	0	0.094	0.076	0.306	0.095	0	74.3925		0.408754	0.0566643	0.00348983	0.000859913	0.00231696	0	0.0013398	0.00146226	0	0.334119	0	0.00103365	0.000949262	0.00402189	0.00186345	0		0.473425		2.59019	0.35907	0.0221143	0.0054491	0.0146821	0	0.00849007	0.00926608	0	2.11725	0
Sejkora: 190 / 1 . ; RO80	Přísečnice	31.844	3.731	0.186	0	0.258246	0	0.078	0	0	37.135	0	0	0	0.292	0.139	0	73.6632		0.426333	0.0497914	0.00228559	0	0.00359441	0	0.00193527	0	0	0.323138	0	0	0	0.00383788	0.00272653	0		0.48394		2.64289	0.308663	0.0141687	0	0.0222822	0	0.011997	0	0	2.00317	0
Sejkora: 191 / 1 . ; RO80	Přísečnice	31.026	4.199	0.165	0.063	0.164665	0	0.085	0	0	37.239	0	0.15	0	0.155	0	0	73.2467		0.415381	0.056037	0.00202754	0.000888107	0.00229191	0	0.00210895	0	0	0.324043	0	0.00164944	0	0.00203723	0	0		0.478735		2.60299	0.351157	0.0127056	0.00556534	0.0143623	0	0.0132158	0	0	2.03062	0
Sejkora: 192 / 1 . ; RO80	Přísečnice	30.568	3.896	0.262	0.137	0.224953	0.183	0.086	0.056	0	37.899	0	0.193	0.141	0.272	0.152	0	74.07		0.40925	0.0519934	0.00321949	0.00193128	0.00313102	0.00230057	0.00213376	0.00099862	0	0.329786	0	0.00212228	0.00176113	0.00357501	0.00298153	0		0.473959		2.59041	0.3291	0.0203783	0.0122243	0.0198183	0.0145618	0.013506	0.00632092	0	2.08743	0
Sejkora: 71 / 1 . ; JA511	Jáchymov - Plavno	2.743	6.715	29.547	0	0	0.26	0.051	0	0	38.405	0.058	0	0	0.062	0.108	0	77.949		0.0367238	0.0896139	0.363077	0	0	0.00326857	0.00126537	0	0	0.334189	0.00081722	0	0	0.000814892	0.00211845	0		0.493949		0.223042	0.54427	2.20515	0	0	0.0198517	0.00768523	0	0	2.0297	0.00496339
Sejkora: 72 / 1 . ; JA511	Jáchymov - Plavno	3.037	6.986	28.381	0	0	0.388	0	0	0	37.49	0	0	0	0	0.086	0	76.368		0.0406599	0.0932305	0.348749	0	0	0.00487772	0	0	0	0.326227	0	0	0	0	0.00168692	0		0.487517		0.250206	0.573706	2.14607	0	0	0.0300157	0	0	0	2.00748	0
Sejkora: 73 / 1 . ; JA511	Jáchymov - Plavno	2.8	6.95	29.997	0	0	0.151	0	0	0	38.949	0.072	0	0	0.099	0.108	0	79.126		0.0374869	0.09275	0.368607	0	0	0.00189829	0	0	0	0.338923	0.00101448	0	0	0.0013012	0.00211845	0		0.500742		0.224588	0.555676	2.20836	0	0	0.0113728	0	0	0	2.03052	0.00607786
Sejkora: 74 / 1 . ; JA511	Jáchymov - Plavno	3.388	6.182	29.347	0	0	0.088	0.075	0	0	40.691	0	0	0	0.127	0.126	0	80.024		0.0453591	0.0825008	0.36062	0	0	0.00110629	0.00186084	0	0	0.354081	0	0	0	0.00166921	0.00247153	0		0.491447		0.276891	0.50362	2.20138	0	0	0.00675325	0.0113594	0	0	2.16146	0
Sejkora: 140 / 1 . ; JA512	Jáchymov - Plavno	2.72	3.909	31.825	0	0	0.054	0.088	0.081	0	39.254	0	0	0.134	0	0.077	0	78.142		0.0364158	0.0521669	0.391069	0	0	0.000678858	0.00218338	0.00144443	0	0.341577	0	0	0.0016737	0	0.00151038	0		0.482514		0.226413	0.324344	2.43145	0	0	0.00422075	0.013575	0.00898066	0	2.12373	0
Sejkora: 141 / 1 . ; JA512	Jáchymov - Plavno	2.501	3.68	33.555	0	0	0.158	0.075	0	0	37.963	0.115	0	0.12	0.089	0.102	0	78.358		0.0334838	0.0491108	0.412328	0	0	0.00198629	0.00186084	0	0	0.330343	0.00162035	0	0.00149883	0.00116976	0.00200076	0		0.49877		0.201398	0.295392	2.48007	0	0	0.0119471	0.0111926	0	0	1.98695	0.00974608
Sejkora: 142 / 1 . ; JA512	Jáchymov - Plavno	2.433	4.072	33.419	0	0	0.136	0.05	0	0	38.074	0.216	0	0.091	0.054	0.097	0	78.642		0.0325734	0.0543422	0.410657	0	0	0.00170972	0.00124056	0	0	0.331309	0.00304344	0	0.00113662	0.000709745	0.00190268	0		0.500523		0.195236	0.325713	2.46137	0	0	0.0102476	0.00743558	0	0	1.98578	0.0182416
Sejkora: 143 / 1 . ; JA512	Jáchymov - Plavno	1.995	3.863	33.556	0	0	0.107	0.052	0	0	37.58	0.089	0	0.119	0.099	0.108	0	77.568		0.0267094	0.051553	0.41234	0	0	0.00134514	0.00129018	0	0	0.32701	0.00125401	0	0.00148634	0.0013012	0.00211845	0		0.493238		0.162453	0.313559	2.50796	0	0	0.00818151	0.00784722	0	0	1.98896	0.00762721
Sejkora: 130 / 1 . ; DY559	Jáchymov - Rovnost	17.665	2.611	3.078	0.155	0	18.053	0.175	0	0	41.317	0.144	0	0	0	0.132	0	83.33		0.236502	0.0348446	0.0378228	0.00218503	0	0.226952	0.00434196	0	0	0.359528	0.00202896	0	0	0	0.00258922	0		0.542649		1.30749	0.192637	0.209101	0.0120798	0	1.25469	0.0240042	0	0	1.98763	0.011217
Sejkora: 131 / 1 . ; DY559	Jáchymov - Rovnost	19.02	2.337	2.964	0.072	0	18.841	0.168	0	0	41.172	0.096	0	0	0	0.145	0	84.815		0.254643	0.031188	0.036422	0.00101498	0	0.236858	0.00416828	0	0	0.358267	0.00135264	0	0	0	0.00284422	0		0.564295		1.35378	0.165807	0.193633	0.00539601	0	1.25923	0.0221601	0	0	1.90468	0.00719114
Sejkora: 132 / 1 . ; DY559	Jáchymov - Rovnost	17.773	2.682	2.958	0.053	0	19.153	0.152	0	0	41.133	0.07	0	0	0	0.102	0	84.076		0.237948	0.0357922	0.0363483	0.000747138	0	0.240781	0.0037713	0	0	0.357927	0.0009863	0	0	0	0.00200076	0		0.555388		1.28531	0.193336	0.19634	0.00403576	0	1.30061	0.0203712	0	0	1.93339	0.00532763
Sejkora: 133 / 1 . ; DY559	Jáchymov - Rovnost	17.194	1.999	2.913	0.144	0	19.188	0.12	0	0	40.566	0	0	0	0	0	0	82.124		0.230196	0.0266773	0.0357953	0.00202996	0	0.241221	0.00297734	0	0	0.352993	0	0	0	0	0	0		0.538897		1.28149	0.148511	0.19927	0.0113006	0	1.34286	0.0165747	0	0	1.96509	0
Sejkora: 59 / 1 . ; LVR454_4	Michalovy Hory	29.478	0.35	0	0.159	0.069	0.089	2.032	0.981	0	36.578	0	0	0	0	0	0	69.736		0.394657	0.00467086	0	0.00224141	0.000960382	0.00111886	0.0504163	0.0174937	0	0.318291	0	0	0	0	0	0		0.454064		2.60749	0.0308604	0	0.014809	0.00634524	0.00739229	0.3331	0.115581	0	2.10295	0
Sejkora: 60 / 1 . ; LVR454_4	Michalovy Hory	29.66	0.508	0	0.143	0	0	2.331	1.254	0	38.577	0	0	0	0	0	0	72.473		0.397093	0.00677943	0	0.00201586	0	0	0.0578349	0.0223619	0	0.335686	0	0	0	0	0	0		0.463723		2.56894	0.0438586	0	0.0130414	0	0	0.374155	0.144668	0	2.17168	0
Sejkora: 61 / 1 . ; LVR454_4	Michalovy Hory	28.348	0.392	0	0.055	0	0.116	1.999	0.925	0	38.272	0	0	0.077	0	0	0	70.184		0.379528	0.00523137	0	0.000775331	0	0.00145829	0.0495976	0.0164951	0	0.333032	0	0	0.000961752	0	0	0		0.43659		2.6079	0.035947	0	0.00532764	0	0.0100205	0.340806	0.113345	0	2.2884	0
Sejkora: 62 / 1 . ; LVR454_2	Michalovy Hory	12.125	0.475	0	0.223	0.592	0	13.606	0.35	0	36.523	0	0	0.05	2.082	1.516	0.125	67.667		0.162332	0.00633903	0	0.00314362	0.0082398	0	0.337581	0.00624137	0	0.317812	0	0	0.000624514	0.0273646	0.0297368	0.00265404		0.517635		0.940807	0.0367384	0	0.0182191	0.0477545	0	1.95648	0.0361724	0	1.84191	0
Sejkora: 63 / 1 . ; LVR454_2	Michalovy Hory	13.148	0.852	0	0.105	0.271	0	13.815	0.278	0	38.436	0	0	0.06	3.54	0.775	0.156	71.436		0.176028	0.0113702	0	0.00148018	0.00377194	0	0.342767	0.00495743	0	0.334459	0	0	0.000749417	0.0465277	0.0152019	0.00331224		0.535417		0.986303	0.0637086	0	0.00829361	0.0211346	0	1.92056	0.0277771	0	1.87401	0
Sejkora: 64 / 1 . ; LVR454_2	Michalovy Hory	13.536	0.907	0	0.141	0.174	0	15.124	0.276	0	41.649	0	0	0	0.109	0.075	0	71.991		0.181222	0.0121042	0	0.00198767	0.00242183	0	0.375244	0.00492177	0	0.362417	0	0	0	0.00143263	0.00147115	0		0.57298		0.94884	0.063375	0	0.010407	0.0126802	0	1.9647	0.0257693	0	1.89754	0
Sejkora: 60 / 1 . ; Kom697A	Jáchymov	5.858	7.414	0.451	0.163	1.809	24.395	0.163	0.22	6.065	34.455	0.788	0	3.211	0.224	0.129	0	85.345		0.0784279	0.0989423	0.00554194	0.0022978	0.0251787	0.30668	0.00404422	0.00392315	0.027173	0.299817	0.0111029	0	0.0401063	0.00294413	0.00253037	0		0.521113		0.451502	0.569601	0.0319045	0.0132282	0.144952	1.76553	0.0232822	0.0225852	0.156433	1.72602	0.0639185
Sejkora: 61 / 1 . ; Kom697A	Jáchymov	6.516	7.906	0.524	0.082	0.251	21.686	0.204	0.294	1.496	33.236	1.255	0	0.837	0.204	0.187	0	74.678		0.0872373	0.105508	0.00643898	0.00115595	0.00349356	0.272624	0.00506148	0.00524275	0.00670253	0.28921	0.017683	0	0.0104544	0.00268126	0.00366806	0		0.48152		0.543513	0.657345	0.0401166	0.00720188	0.0217659	1.69852	0.0315344	0.0326638	0.0417586	1.80186	0.11017
Sejkora: 62 / 1 . ; Kom697A	Jáchymov	6.421	7.526	0.8	0.153	0.449	19.046	0.195	0.404	3.821	29.535	1.64	0	1.247	3.206	2.345	0	76.788		0.0859654	0.100437	0.0098305	0.00215683	0.00624944	0.239436	0.00483818	0.00720433	0.0171192	0.257005	0.0231076	0	0.0155754	0.0421378	0.0459979	0		0.448913		0.574491	0.671201	0.0656954	0.0144137	0.0417638	1.6001	0.0323326	0.0481452	0.114405	1.71751	0.154424
Sejkora: 63 / 1 . ; Kom697A	Jáchymov	4.102	6.712	0.523	0.209	4.027	23.299	0.186	0.829	1.451	26.534	2.393	0	5.949	2.488	0.764	0	79.466		0.0549183	0.0895738	0.00642669	0.00294626	0.0560501	0.292902	0.00461488	0.0147831	0.00650091	0.230891	0.0337174	0	0.0743047	0.0327008	0.0149861	0		0.507432		0.324684	0.529571	0.0379954	0.0174186	0.331375	1.73167	0.0272837	0.0873997	0.0384342	1.36506	0.199341
Sejkora: 80 / 1 . ; Dy560	Jáchymov - Rovnost	17.464	3.512	1.218	0.13	0	18.795	0.147	0.084	0	39.102	0	0	0	0	0.139	0	80.591		0.233811	0.0468688	0.0149669	0.0018326	0	0.23628	0.00364724	0.00149793	0	0.340254	0	0	0	0	0.00272653	0		0.537407		1.30522	0.261639	0.0835509	0.0102302	0	1.319	0.0203602	0.00836199	0	1.89942	0
Sejkora: 81 / 1 . ; Dy560	Jáchymov - Rovnost	16.422	2.695	1.189	0.144	0	18.589	0.123	0	0.07	40.643	0	0	0	0	0.189	0	80.064		0.219861	0.0359657	0.0146106	0.00202996	0	0.23369	0.00305178	0	0.000313621	0.353663	0	0	0	0	0.00370729	0		0.509209		1.29531	0.211891	0.0860781	0.0119595	0	1.37679	0.0179795	0	0.00184769	2.0836	0
Sejkora: 123 / 1 . ; jach873	Jáchymov - Plavno	3.637	6.089	30.981	0	0.07	0.109	0	0	0	39.314	0.05	0	0	0	0.26	0	80.51		0.0486928	0.0812597	0.380698	0	0.000974301	0.00137029	0	0	0	0.342099	0.0007045	0	0	0	0.00509998	0		0.512995		0.284756	0.475207	2.22633	0	0.00569772	0.00801344	0	0	0	2.0006	0.00411992
Sejkora: 124 / 1 . ; jach873	Jáchymov - Plavno	2.951	7.265	29.442	0.199	0	0.144	0.107	0	0	38.186	0	0	0.089	0	0.351	0	78.734		0.0395085	0.0969538	0.361787	0.00280529	0	0.00181029	0.0026548	0	0	0.332283	0	0	0.00111164	0	0.00688497	0		0.50552		0.234463	0.575371	2.14702	0.016648	0	0.0107431	0.0157549	0	0	1.97193	0
Sejkora: 125 / 1 . ; jach873	Jáchymov - Plavno	2.761	7.238	29.574	0.05	0.149	0.1	0	0.083	0	39.164	0.057	0	0.075	0.062	0.286	0	79.599		0.0369647	0.0965935	0.363409	0.000704847	0.00207387	0.00125714	0	0.0014801	0	0.340794	0.00080313	0	0.000936772	0.000814892	0.00560998	0		0.501003		0.221344	0.578401	2.17609	0.00422061	0.0124183	0.00752776	0	0.0088628	0	2.04067	0.00480913
Sejkora: 126 / 1 . ; jach873	Jáchymov - Plavno	3.093	5.572	30.907	0.055	0.056	0.488	0.062	0	0.05	38.497	0.11	0	0	0	0.261	0	79.151		0.0414096	0.0743602	0.379789	0.000775331	0.000779441	0.00613486	0.00153829	0	0.000224015	0.33499	0.0015499	0	0	0	0.00511959	0		0.504787		0.246102	0.44193	2.25713	0.00460788	0.0046323	0.0364601	0.00914224	0	0.00133134	1.99088	0.00921122
Sejkora: 127 / 1 . ; jach873	Jáchymov - Plavno	2.66	5.662	31.5	0.074	0.078	0.134	0.097	0.052	0	37.612	0.059	0	0.114	0	0.171	0	78.213		0.0356125	0.0755612	0.387076	0.00104317	0.00108565	0.00168457	0.00240669	0.00092729	0	0.327289	0.00083131	0	0.00142389	0	0.00335422	0		0.50447		0.211782	0.449351	2.30188	0.00620358	0.00645618	0.0100179	0.0143122	0.00551444	0	1.94633	0.00494367
Sejkora: 51 / 1 . ; ZL392	Zálesí	13.533	20.085	1.12	0.079	0	0	1.416	0.068	0	38.456	0	0	0.081	0	0	0	74.838		0.181182	0.268041	0.0137627	0.00111366	0	0	0.0351326	0.00121261	0	0.334633	0	0	0.00101171	0	0	0		0.499232		1.08877	1.61072	0.0827032	0.00669223	0	0	0.21112	0.00728685	0	2.01089	0
Sejkora: 52 / 1 . ; ZL392	Zálesí	12.009	21.908	0.238	0	0.042	0	2.913	0.066	0	40.85	0.113	0	0.074	0	0	0	78.213		0.160779	0.292369	0.00292457	0	0.00058458	0	0.072275	0.00117694	0	0.355465	0.00159217	0	0.000924281	0	0	0		0.528932		0.911905	1.65826	0.0165876	0	0.00331563	0	0.40993	0.0066754	0	2.01613	0.00903048
Sejkora: 53 / 1 . ; ZL392	Zálesí	13.456	20.344	0.095	0	0.096	0	1.953	0	0	39.439	0.192	0	0.064	0	0	0	75.639		0.180151	0.271497	0.00116737	0	0.00133618	0	0.0484562	0	0	0.343187	0.00270528	0	0.000799378	0	0	0		0.502608		1.0753	1.62053	0.00696788	0	0.0079755	0	0.289229	0	0	2.04843	0.0161474
Sejkora: 113 / 1 . ; Jach672	Jáchymov - Plavno	23.703	5.838	0.134	0	0	0	3.608	1.773	0	39.477	0	0	0	0	0	0	74.533		0.31734	0.07791	0.00164661	0	0	0	0.0895188	0.031617	0	0.343517	0	0	0	0	0	0		0.486415		1.95722	0.480516	0.0101556	0	0	0	0.552113	0.195	0	2.11867	0
Sejkora: 114 / 1 . ; Jach672	Jáchymov - Plavno	24.797	4.967	0	0	0	0.101	3.673	1.22	0	39.126	0	0	0	0	0	0	73.884		0.331986	0.0662862	0	0	0	0.00126972	0.0911315	0.0217556	0	0.340463	0	0	0	0	0	0		0.490674		2.02978	0.405277	0	0	0	0.00776309	0.557182	0.133015	0	2.0816	0
Sejkora: 16 / 1 . ; ZL375	Zálesí	14.442	16.313	1.144	0.134	0.04	4.912	0.803	0.561	0	37.907	0	0	0.108	0.095	0.046	0	76.505		0.193352	0.217702	0.0140576	0.00188899	0.000556743	0.0617509	0.0199234	0.010004	0	0.329856	0	0	0.00134895	0.00124862	0.000902304	0		0.509232		1.13908	1.28253	0.0828166	0.0111285	0.0032799	0.363788	0.117373	0.058936	0	1.94325	0
Sejkora: 17 / 1 . ; ZL375	Zálesí	7.019	8.235	0.627	0.154	0.122	25.079	0.198	0.121	0	41.616	0.069	0.06	0.108	0	0.13	0	83.538		0.0939716	0.109899	0.00770465	0.00217093	0.00169807	0.315279	0.00491261	0.00215773	0	0.36213	0.00097221	0.000659776	0.00134895	0	0.00254999	0		0.535636		0.526318	0.615523	0.0431524	0.012159	0.00951057	1.76582	0.0275147	0.0120851	0	2.02823	0.00544518
Sejkora: 18 / 1 . ; ZL375	Zálesí	12.328	9.702	2.206	0.086	0.123	17.768	0.3	0.087	0	40.593	0	0	0.084	0.145	0	0	83.422		0.165049	0.129476	0.0271076	0.00121234	0.00171199	0.223369	0.00744336	0.00155143	0	0.353228	0	0	0.00104918	0.0019058	0	0		0.55537		0.891564	0.699406	0.14643	0.0065488	0.00924781	1.2066	0.0402075	0.0083805	0	1.90807	0
Sejkora: 19 / 1 . ; ZL377	Zálesí	15.13	13.935	1.603	0.581	0.729	6.206	1.108	0.66	0	40.549	0.067	0.059	0.062	0	0.114	0	80.803		0.202563	0.185967	0.0196979	0.00819032	0.0101466	0.0780183	0.0274908	0.0117694	0	0.352845	0.00094403	0.000648779	0.000774398	0	0.00223614	0		0.532074		1.14211	1.04854	0.111063	0.0461796	0.05721	0.439892	0.155002	0.0663598	0	1.98945	0.00532274
Sejkora: 20 / 1 . ; ZL377	Zálesí	11.105	8.916	1.543	0.319	0.139	16.907	0.516	0.228	0	39.918	0	0.055	0	0	0	0	79.646		0.148676	0.118987	0.0189606	0.00449692	0.00193468	0.212545	0.0128026	0.00406581	0	0.347355	0	0.000604794	0	0	0	0		0.518403		0.860387	0.688578	0.109725	0.0260237	0.011196	1.23	0.0740886	0.0235289	0	2.01014	0
Sejkora: 21 / 1 . ; ZL377	Zálesí	10.15	9.754	1.863	0.315	0.248	16.41	0.909	0.432	0	39.625	0	0	0.08	0	0	0	79.786		0.13589	0.13017	0.0228928	0.00444053	0.00345181	0.206297	0.0225534	0.00770364	0	0.344805	0	0	0.000999223	0	0	0		0.525696		0.775486	0.742846	0.130643	0.0253409	0.0196985	1.17728	0.128706	0.0439625	0	1.96771	0
Sejkora: 22 / 1 . ; ZL377	Zálesí	15.502	15.494	1.032	0.678	0.815	4.032	1.492	1.075	0	37.489	0.062	0.061	0.125	0.833	0.339	0	79.029		0.207543	0.206773	0.0126813	0.00955772	0.0113436	0.050688	0.0370183	0.0191699	0	0.326218	0.00087358	0.000670772	0.00156129	0.0109485	0.00664959	0		0.535605		1.16248	1.15816	0.07103	0.0535342	0.0635374	0.283911	0.207345	0.107374	0	1.8272	0.00489305
Sejkora: 23 / 1 . ; ZL377	Zálesí	10.237	8.912	1.632	0.305	0.211	17.477	0.675	0.302	0	38.746	0	0	0.051	0.078	0	0	78.626		0.137055	0.118934	0.0200542	0.00429957	0.00293682	0.219711	0.0167476	0.00538541	0	0.337156	0	0	0.000637005	0.00102519	0	0		0.519737		0.7911	0.686502	0.115756	0.0248177	0.0169518	1.2682	0.0966693	0.0310854	0	1.94612	0
Sejkora: 24 / 1 . ; ZL377	Zálesí	22.015	9.51	0.577	0.496	0.234	2.646	1.469	0.317	0	36.597	0	0	0	0.131	0.057	0	74.049		0.294741	0.126914	0.00709025	0.00699208	0.00325695	0.033264	0.0364476	0.0056529	0	0.318456	0	0	0	0.00172179	0.00111807	0		0.508706		1.73818	0.748453	0.0418135	0.0412345	0.0192073	0.196169	0.214943	0.033337	0	1.87804	0
Sejkora: 25 / 1 . ; ZL375	Zálesí	10.844	13.136	1.373	0.119	0	12.927	0.781	0.175	0	39.122	0	0.107	0.081	0	0	0	78.665		0.145181	0.175304	0.0168716	0.00167754	0	0.162511	0.0193775	0.00312069	0	0.340428	0	0.0011766	0.00101171	0	0	0		0.520923		0.8361	1.00958	0.0971636	0.00966094	0	0.935902	0.111595	0.0179721	0	1.96053	0
Sejkora: 26 / 1 . ; ZL375	Zálesí	9.478	8.089	0.662	0	0.046	22.72	0.357	0.235	0	39.488	0	0	0.098	0	0.136	0	81.309		0.126893	0.10795	0.00813474	0	0.000640255	0.285623	0.00885759	0.00419064	0	0.343613	0	0	0.00122405	0	0.00266768	0		0.538099		0.707452	0.601843	0.0453526	0	0.00356954	1.5924	0.0493827	0.0233636	0	1.9157	0
Sejkora: 27 / 1 . ; ZL375	Zálesí	13.097	9.629	1.958	0.148	0.079	15.84	0.349	0.079	0	39.7	0.085	0.076	0.053	0	0	0	81.093		0.175345	0.128502	0.0240601	0.00208635	0.00109957	0.199132	0.0086591	0.00140877	0	0.345458	0.00119765	0.000835716	0.000661985	0	0	0		0.538884		0.976156	0.71538	0.133944	0.0116148	0.00612136	1.10858	0.0482058	0.0078427	0	1.92318	0.0066674
Sejkora: 28 / 1 . ; ZL375	Zálesí	11.024	8.178	1.106	0.059	0.067	19.954	0.321	0.102	0	39.271	0	0	0.074	0.147	0	0	80.303		0.147591	0.109138	0.0135907	0.000831719	0.000932545	0.25085	0.00796439	0.00181891	0	0.341725	0	0	0.000924281	0.00193208	0	0		0.530899		0.834007	0.616717	0.076798	0.00469987	0.00526962	1.4175	0.0450051	0.0102783	0	1.93101	0
Sejkora: 60 / 1 . ; ZL376	Zálesí	8.615	8.526	0.566	0	0.22	20.8	0.516	0.212	0	39.867	0	0	0.102	1.282	0.18	0	80.886		0.115339	0.113782	0.00695508	0	0.00306209	0.261486	0.0128026	0.00378049	0	0.346911	0	0	0.00127401	0.0168499	0.00353075	0		0.513427		0.673937	0.66484	0.0406391	0	0.0178921	1.52789	0.0748066	0.0220897	0	2.02703	0
Sejkora: 61 / 1 . ; ZL376	Zálesí	9.506	7.864	0.581	0.111	0.102	21.893	0.722	0.085	0	39.666	0	0	0.088	0	0	0	80.618		0.127268	0.104948	0.0071394	0.00156476	0.0014197	0.275226	0.0179137	0.00151576	0	0.345162	0	0	0.00109915	0	0	0		0.53548		0.713013	0.587964	0.0399982	0.0087665	0.00795378	1.54194	0.100361	0.00849199	0	1.93375	0
Sejkora: 74 / 1 . ; ZAL2	Zálesí	10.025	8.35	2.064	0.134	0	20.222	0.171	0.086	0	39.206	0	0.099	0.06	0	0	0	80.417		0.134216	0.111433	0.0253627	0.00188899	0	0.25422	0.00424271	0.00153359	0	0.341159	0	0.00108863	0.000749417	0	0	0		0.531364		0.757766	0.629137	0.143194	0.0106649	0	1.43529	0.0239537	0.00865844	0	1.92613	0
Sejkora: 76 / 1 . ; ZAL1	Zálesí	14.92	12.5	0.369	0.128	0	8.894	0.587	0.269	0	37.696	0	0	0.057	0	0.172	0	75.592		0.199752	0.166817	0.00453432	0.00180441	0	0.11181	0.0145642	0.00479694	0	0.328019	0	0	0.000711946	0	0.00337383	0		0.499281		1.20023	1.00234	0.0272451	0.010842	0	0.671828	0.0875108	0.0288231	0	1.97095	0
Sejkora: 77 / 1 . ; ZAL1	Zálesí	17.601	13.721	0.464	0.256	0	5.93	0.947	0.601	0	39.492	0	0.069	0.062	0.073	0.067	0	79.283		0.235645	0.183111	0.00570169	0.00360882	0	0.0745486	0.0234962	0.0107173	0	0.343648	0	0.000758742	0.000774398	0.00095947	0.00131423	0		0.526112		1.3437	1.04414	0.0325122	0.0205782	0	0.425092	0.13398	0.0611125	0	1.95955	0
Sejkora: 193 / 1 . ; ZL391	Zálesí	16.186	15.267	0	0.06	0	0	4.197	0	0	40.529	0.082	0	0	0	0	0	76.321		0.216701	0.203743	0	0.000845816	0	0	0.104133	0	0	0.352671	0.00115538	0	0	0	0	0		0.525422		1.2373	1.16331	0	0.00482935	0	0	0.594565	0	0	2.01365	0.00659687
Sejkora: 194 / 1 . ; ZL391	Zálesí	16.249	14.532	0	0.077	0	0	4.789	0.068	0	40.444	0.131	0	0.057	0	0	0	76.347		0.217544	0.193934	0	0.00108546	0	0	0.118821	0.00121261	0	0.351932	0.00184579	0	0.000711946	0	0	0		0.531385		1.22817	1.09488	0	0.00612812	0	0	0.670818	0.00684594	0	1.98687	0.0104206
Sejkora: 195 / 1 . ; ZL391	Zálesí	16.508	15.097	0	0.054	0	0	4.403	0.064	0	40.502	0	0	0.057	0	0	0	76.685		0.221012	0.201474	0	0.000761235	0	0	0.109244	0.00114128	0	0.352436	0	0	0.000711946	0	0	0		0.532491		1.24516	1.13509	0	0.00428872	0	0	0.615467	0.00642985	0	1.98559	0
Sejkora: 198 / 1 . ; ZL395	Zálesí	17.642	18.754	0	0	0.104	0	0.141	0.182	0	39.511	0.073	0	0.104	0	0.064	0	76.575		0.236194	0.250278	0	0	0.00144753	0	0.00349838	0.00324551	0	0.343813	0.00102857	0	0.00129899	0	0.00125538	0		0.491418		1.44191	1.52789	0	0	0.00883687	0	0.0213568	0.0198131	0	2.0989	0.00627919
Sejkora: 199 / 1 . ; ZL395	Zálesí	16.431	19.984	0.104	0.098	0.081	0	0.103	0.157	0	40.832	0	0	0.145	0	0.122	0	78.057		0.219981	0.266693	0.00127796	0.0013815	0.00112741	0	0.00255555	0.0027997	0	0.355308	0	0	0.00181109	0	0.00239307	0		0.493016		1.33858	1.62282	0.0077764	0.00840641	0.00686025	0	0.0155505	0.0170362	0	2.16205	0
Sejkora: 200 / 1 . ; ZL395	Zálesí	15.168	20.877	0	0	0	0	0.215	0.328	0	38.577	0.159	0	0.107	0	0.098	0	75.529		0.203072	0.27861	0	0	0	0	0.00533441	0.00584906	0	0.335686	0.00224031	0	0.00133646	0	0.0019223	0		0.487017		1.25091	1.71623	0	0	0	0	0.0328597	0.0360299	0	2.06781	0.0138002
Sejkora: 201 / 1 . ; ZL394	Zálesí	17.724	13.658	0	0.875	0.097	0.058	1.118	1.623	0	37.389	0	0	0	0	0	0	72.542		0.237292	0.18227	0	0.0123348	0.0013501	0.000729143	0.0277389	0.0289421	0	0.325348	0	0	0	0	0	0		0.461715		1.54181	1.1843	0	0.0801456	0.0087723	0.00473762	0.180234	0.188052	0	2.11395	0
Sejkora: 202 / 1 . ; ZL394	Zálesí	18.167	14.14	0	0.538	0	0	0.869	1.627	0	40.027	0.114	0	0.07	0	0	0	75.552		0.243223	0.188703	0	0.00758415	0	0	0.0215609	0.0290135	0	0.348303	0.00160626	0	0.00087432	0	0	0		0.461071		1.58255	1.22781	0	0.049347	0	0	0.140288	0.188779	0	2.26627	0.0104513
Sejkora: 203 / 1 . ; ZL394	Zálesí	19.844	13.065	0	1.259	0	0	0.567	2.17	0	40.102	0	0	0	0	0	0	77.007		0.265675	0.174357	0	0.017748	0	0	0.0140679	0.0386965	0	0.348956	0	0	0	0	0	0		0.471848		1.68916	1.10856	0	0.112842	0	0	0.0894438	0.246032	0	2.21866	0
Sejkora: 33 / 1 . ; Dy421	Svatá Anna near Mariánské Lázně	10.668	17.606	0	2.245	3.591	0.142	2.754	0	0	40.544	0	0.122	0.143	0	0	0	77.815		0.142825	0.234958	0	0.0316476	0.0499816	0.00178514	0.06833	0	0	0.352802	0	0.00134154	0.00178611	0	0	0		0.529527		0.809165	1.33114	0	0.179297	0.283167	0.0101136	0.387119	0	0	1.99878	0
Sejkora: 34 / 1 . ; Dy421	Svatá Anna near Mariánské Lázně	12.892	14.841	0	1.961	1.959	0	5.067	0	0	40.493	0.126	0	0.07	0	0	0	77.409		0.1726	0.198058	0	0.0276441	0.0272665	0	0.125718	0	0	0.352358	0.00177534	0	0.00087432	0	0	0		0.551287		0.939258	1.07779	0	0.150434	0.148379	0	0.684135	0	0	1.91747	0.00966107
Sejkora: 35 / 1 . ; Dy421	Svatá Anna near Mariánské Lázně	12.124	14.472	0.092	1.994	1.818	0	5.068	0	0	40.258	0	0	0.082	0	0	0	75.908		0.162318	0.193134	0.00113051	0.0281093	0.025304	0	0.125743	0	0	0.350313	0	0	0.0010242	0	0	0		0.535739		0.908941	1.0815	0.00633055	0.157405	0.141696	0	0.704129	0	0	1.96167	0
Sejkora: 36 / 1 . ; Dy421	Svatá Anna near Mariánské Lázně	9.466	18.782	0	2.098	3.664	0	2.799	0	0	39.62	0	0	0.057	0	0	0	76.486		0.126732	0.250652	0	0.0295754	0.0509977	0	0.0694465	0	0	0.344762	0	0	0.000711946	0	0	0		0.527404		0.720884	1.42577	0	0.168232	0.290087	0	0.395028	0	0	1.96109	0
Sejkora: 80 / 1 . ; ZL393	Zálesí	15.745	16.53	0	0	0	1.828	2.87	0.07	0	40.078	0	0	0.082	0	0	0	77.203		0.210797	0.220598	0	0	0	0.0229806	0.0712081	0.00124827	0	0.348747	0	0	0.0010242	0	0	0		0.525584		1.20322	1.25916	0	0	0	0.131172	0.406452	0.00712508	0	1.99063	0
Sejkora: 81 / 1 . ; ZL393	Zálesí	14.981	16.47	0	0	0	1.433	3.298	0.059	0	39.979	0	0	0.067	0.051	0	0	76.338		0.200568	0.219798	0	0	0	0.0180149	0.0818273	0.00105212	0	0.347885	0	0	0.000836849	0.000670314	0	0		0.520208		1.15666	1.26756	0	0	0	0.10389	0.471892	0.00606748	0	2.00623	0
Sejkora: 82 / 1 . ; ZL393	Zálesí	16.483	16.242	0.103	0	0	0.951	3.034	0	0	38.703	0	0	0.104	0.05	0	0	75.67		0.220677	0.216755	0.00126568	0	0	0.0119554	0.0752771	0	0	0.336782	0	0	0.00129899	0.000657171	0	0		0.52593		1.25878	1.23641	0.00721964	0	0	0.0681959	0.429394	0	0	1.92107	0
Sejkora: 83 / 1 . ; ZL393	Zálesí	14.552	16.895	0	0	0	2.619	2.824	0.062	0	40.713	0	0	0.055	0	0	0	77.72		0.194825	0.225469	0	0	0	0.0329246	0.0700668	0.00110561	0	0.354273	0	0	0.000686966	0	0	0		0.523285		1.11693	1.29262	0	0	0	0.188757	0.401694	0.0063385	0	2.03105	0
Sejkora: 84 / 1 . ; ZL396	Zálesí	13.483	21.524	1.223	0.173	0.041	0.121	0.289	0.196	0	38.401	0	0	0.092	0	0	0	75.543		0.180513	0.287245	0.0150284	0.00243877	0.000570662	0.00152114	0.00717043	0.00349517	0	0.334154	0	0	0.00114911	0	0	0		0.494487		1.09515	1.74268	0.0911756	0.0147958	0.00346215	0.00922862	0.0435023	0.0212048	0	2.02728	0
Sejkora: 85 / 1 . ; ZL396	Zálesí	12.962	20.977	1.195	0.173	0.05	0	0.22	0.207	0	38.699	0	0	0.107	0	0	0	74.59		0.173537	0.279945	0.0146843	0.00243877	0.000695929	0	0.00545846	0.00369133	0	0.336747	0	0	0.00133646	0	0	0		0.47676		1.09198	1.76155	0.0924006	0.0153459	0.00437912	0	0.0343472	0.0232276	0	2.11897	0
Sejkora: 86 / 1 . ; ZL396	Zálesí	14.606	20.829	1.101	0.166	0.066	0	0.281	0.383	0	38.609	0	0	0	0.106	0	0	76.147		0.195548	0.27797	0.0135292	0.00234009	0.000918626	0	0.00697194	0.00682985	0	0.335964	0	0	0	0.0013932	0	0		0.497277		1.17971	1.67695	0.0816198	0.0141174	0.00554194	0	0.0420607	0.0412034	0	2.02682	0
Sejkora: 87 / 1 . ; ZL396	Zálesí	13.529	21.28	0.978	0.168	0.085	0.227	0.342	0.455	0	38.106	0.072	0	0.123	0.078	0	0	75.443		0.181129	0.283989	0.0120178	0.00236829	0.00118308	0.00285372	0.00848543	0.00811379	0	0.331587	0.00101448	0	0.00153631	0.00102519	0	0		0.492025		1.10439	1.73155	0.0732754	0.01444	0.00721353	0.0173998	0.0517377	0.0494717	0	2.02177	0.00618554
Sejkora: 55 / 1 . ; JA375	Jáchymov	2.882	11.064	22.915	0.087	0	2.936	0	0	0	38.271	0	0.108	0	0	0.356	0	78.619		0.0385847	0.147653	0.281582	0.00122643	0	0.0369097	0	0	0	0.333023	0	0.0011876	0	0	0.00698305	0		0.505956		0.228783	0.875488	1.66961	0.00727198	0	0.218852	0	0	0	1.97462	0
Sejkora: 56 / 1 . ; JA375	Jáchymov	5.81	15.526	14.294	0.087	0	1.406	0	0	0	38.081	0	0.063	0.09	0	0.799	0	76.156		0.0777853	0.2072	0.175646	0.00122643	0	0.0176754	0	0	0	0.33137	0	0.000692764	0.00112413	0	0.0156726	0		0.479533		0.486631	1.29626	1.09886	0.00767267	0	0.110579	0	0	0	2.07308	0
Sejkora: 57 / 1 . ; JA375	Jáchymov	1.64	9.174	29.355	0.121	0	3.454	0	0	0	41.386	0.099	0	0.117	0	0.077	0	85.423		0.0219566	0.12243	0.360718	0.00170573	0	0.0434217	0	0	0	0.360129	0.00139491	0	0.00146136	0	0.00151038	0		0.550232		0.119713	0.667519	1.96672	0.00930006	0	0.236746	0	0	0	1.96351	0.0076054
Sejkora: 103 / 1 . ; JA339	Jáchymov -Marie	1.207	2.099	32.042	3.99	0	0	1.991	1.315	0	42.571	0.495	0	0	0	0	0	85.71		0.0161595	0.0280118	0.393736	0.0562468	0	0	0.0493991	0.0234497	0	0.37044	0.00697455	0	0	0	0	0		0.543553		0.0891883	0.154604	2.17312	0.310439	0	0	0.272645	0.129425	0	2.04455	0.0384942
Sejkora: 104 / 1 . ; JA339	Jáchymov -Marie	1.354	1.982	32.646	4.393	0.041	0	2.135	1.368	0	44.149	0.438	0	0	0.065	0	0	88.571		0.0181276	0.0264504	0.401158	0.0619278	0.000570662	0	0.0529719	0.0243949	0	0.384172	0.00617142	0	0	0.000854322	0	0		0.561206		0.0969033	0.141394	2.14444	0.331043	0.00305055	0	0.283168	0.130406	0	2.05364	0.0329901
Sejkora: 105 / 1 . ; JA339	Jáchymov -Marie	2.277	2.493	23.384	8.067	0	0	3.933	1.1	0	44.29	0.227	0	0	0	0	0	85.771		0.0304849	0.0332699	0.287345	0.11372	0	0	0.0975824	0.0196157	0	0.385399	0.00319843	0	0	0	0	0		0.562403		0.162614	0.17747	1.53277	0.606612	0	0	0.52053	0.104635	0	2.05581	0.0170613
Sejkora: 106 / 1 . ; JA339	Jáchymov -Marie	2.087	1.865	23.083	7.428	0	0.178	2.785	0.759	0	40.784	0.274	0	0	0.074	0	0	79.317		0.0279411	0.024889	0.283647	0.104712	0	0.00223772	0.0690992	0.0135349	0	0.35489	0.00386066	0	0	0.000972613	0	0		0.512526		0.16355	0.145685	1.66029	0.612918	0	0.0130982	0.404463	0.0792245	0	2.0773	0.0225979
Sejkora: 107 / 1 . ; JA339	Jáchymov -Marie	1.703	2.114	27.263	5.379	0.096	0.076	1.669	0.799	0	40.553	0.327	0.088	0	0	0	0	80.067		0.0228001	0.028212	0.335011	0.0758274	0.00133618	0.000955429	0.0414099	0.0142482	0	0.35288	0.00460743	0.000967671	0	0	0	0		0.505552		0.135298	0.167413	1.98799	0.449968	0.00792906	0.00566962	0.245731	0.0845501	0	2.09403	0.027341
Sejkora: 108 / 1 . ; JA339	Jáchymov -Marie	1.268	1.757	28.442	5.065	0.044	0	1.33	0.998	0	38.472	0.14	0	0	0	0	0	77.516		0.0169762	0.0234477	0.349499	0.071401	0.000612418	0	0.0329989	0.0177968	0	0.334772	0.0019726	0	0	0	0	0		0.494935		0.1029	0.142126	2.11845	0.43279	0.00371211	0	0.200019	0.107874	0	2.02919	0.0119567
Sejkora: 124 / 1 . ; JA348	Jáchymov -Marie	1.52	2.788	24.757	6.9	0.081	0	1.321	1.274	0.082	40.923	0.173	0	0	0	0	0	79.819		0.02035	0.0372068	0.304217	0.0972689	0.00112741	0	0.0327756	0.0227186	0.000367385	0.3561	0.00243757	0	0	0	0	0		0.492946		0.123847	0.226435	1.85142	0.591965	0.00686123	0	0.199468	0.138262	0.00223585	2.16718	0.0148347
Sejkora: 125 / 1 . ; JA348	Jáchymov -Marie	1.613	2.494	25.425	6.886	0	0.199	1.507	1.282	0	40.519	0.06	0	0	0	0	0	79.985		0.0215951	0.0332832	0.312426	0.0970715	0	0.00250172	0.0373905	0.0228613	0	0.352584	0.0008454	0	0	0	0	0		0.504268		0.128474	0.198009	1.85869	0.5775	0	0.0148833	0.222444	0.136007	0	2.0976	0.00502947
Sejkora: 126 / 1 . ; JA348	Jáchymov -Marie	2.159	2.934	23.297	7.057	0	0	1.761	1.435	0	40.854	0.197	0	0	0	0	0	79.694		0.0289051	0.0391552	0.286276	0.0994821	0	0	0.0436925	0.0255896	0	0.355499	0.00277573	0	0	0	0	0		0.497511		0.174298	0.236106	1.72625	0.599878	0	0	0.263466	0.154306	0	2.14367	0.0167377
Sejkora: 127 / 1 . ; JA348	Jáchymov -Marie	3.494	4.348	20.07	6.6	0.055	0	2.526	1.022	0	42.067	0.152	0	0	0	0	0	80.334		0.0467783	0.0580255	0.246623	0.0930398	0.000765522	0	0.0626731	0.0182248	0	0.366055	0.00214168	0	0	0	0	0		0.507905		0.276301	0.342734	1.45671	0.549551	0.00452165	0	0.370186	0.107647	0	2.16215	0.0126501
Sejkora: 128 / 1 . ; JA348	Jáchymov -Marie	2.059	4.271	25.206	4.575	0	0	1.168	0.361	0	40.984	0	0	0	0	0	0	78.624		0.0275662	0.0569979	0.309734	0.0644935	0	0	0.0289795	0.00643753	0	0.356631	0	0	0	0	0	0		0.487771		0.169544	0.350561	1.905	0.396662	0	0	0.178236	0.0395935	0	2.19343	0
Sejkora: 129 / 1 . ; JA348	Jáchymov -Marie	2.675	5.626	21.776	4.99	0	0	1.745	0.218	0	39.651	0.082	0	0	0	0	0	76.763		0.0358134	0.0750808	0.267586	0.0703437	0	0	0.0432955	0.00388748	0	0.345031	0.00115538	0	0	0	0	0		0.49212		0.218321	0.457699	1.63123	0.428821	0	0	0.263933	0.0236984	0	2.10334	0.00704329
Sejkora: 130 / 1 . ; JA348	Jáchymov -Marie	5.389	6.713	14.968	5.266	0	0.127	2.989	0.298	0	39.382	0.1	0	0	0	0.068	0	75.3		0.0721489	0.0895872	0.183929	0.0742345	0	0.00159657	0.0741606	0.00531408	0	0.342691	0.001409	0	0	0	0.00133384	0		0.495656		0.436687	0.542234	1.11324	0.44931	0	0.00966338	0.448863	0.0321639	0	2.07416	0.00852809
Sejkora: 131 / 1 . ; JA348	Jáchymov -Marie	7.336	6.979	9.502	7.614	0.106	0.114	4.157	0.452	0	40.869	0.129	0	0	0	0	0	77.258		0.0982156	0.093137	0.116762	0.107334	0.00147537	0.00143314	0.10314	0.00806029	0	0.35563	0.00181761	0	0	0	0	0		0.521497		0.565002	0.535787	0.671692	0.617457	0.00848731	0.0082444	0.593331	0.0463682	0	2.04582	0.0104561
Sejkora: 132 / 1 . ; JA348	Jáchymov -Marie	2.073	4.649	23.834	4.802	0	0	1.48	0.245	0	38.716	0.074	0	0.062	0	0	0	75.935		0.0277537	0.0620424	0.292875	0.0676935	0	0	0.0367206	0.00436896	0	0.336895	0.00104266	0	0.000774398	0	0	0		0.487085		0.170937	0.382125	1.80384	0.41693	0	0	0.226165	0.0269088	0	2.07497	0.00642183
Sejkora: 100 / 1 . ; JA378	Jáchymov	8.387	17.674	9.491	0	0.04	0.272	1.089	0.125	0	37.136	0	0	0.222	0	0.048	0	74.484		0.112287	0.235865	0.116627	0	0.000556743	0.00341943	0.0270194	0.00222906	0	0.323147	0	0	0.00277284	0	0.000941535	0		0.495774		0.679462	1.42725	0.705724	0	0.00336893	0.0206915	0.163498	0.0134884	0	1.95541	0
Sejkora: 101 / 1 . ; JA378	Jáchymov	8.128	18.903	10.081	0	0	0.11	1.096	0.114	0	37.441	0	0	0.387	0	0.077	0	76.337		0.108819	0.252267	0.123877	0	0	0.00138286	0.0271931	0.0020329	0	0.325801	0	0	0.00483374	0	0.00151038	0		0.513538		0.635702	1.4737	0.723665	0	0	0.00807841	0.158857	0.0118759	0	1.90327	0
Sejkora: 102 / 1 . ; JA378	Jáchymov	8.226	18.218	9.669	0.087	0.055	0	1.012	0.129	0	35.966	0	0	0.226	0	0.089	0	73.677		0.110131	0.243125	0.118814	0.00122643	0.000765522	0	0.0251089	0.00230039	0	0.312966	0	0	0.00282281	0	0.00174576	0		0.499171		0.661884	1.46117	0.714067	0.00737082	0.00460076	0	0.150904	0.0138253	0	1.88091	0
Sejkora: 109 / 1 . ; JA377	Jáchymov - Eliáš	14.83	18.766	3.279	0.118	0	1.698	0.164	0.093	0	37.928	0.139	0	0.082	0	0.099	0	77.196		0.198547	0.250438	0.0402928	0.00166344	0	0.0213463	0.00406903	0.00165842	0	0.330038	0.00195851	0	0.0010242	0	0.00194192	0		0.516357		1.15354	1.45503	0.234098	0.00966448	0	0.124021	0.0236408	0.00963533	0	1.9175	0.0113788
Sejkora: 110 / 1 . ; JA377	Jáchymov - Eliáš	13.071	17.889	3.632	0.216	0	2.224	0.13	0.111	0.059	38.191	0	0.052	0.11	0	0.209	0	75.894		0.174997	0.238735	0.0446305	0.00304494	0	0.0279589	0.00322545	0.00197941	0.000264338	0.332327	0	0.000571806	0.00137393	0	0.0040996	0		0.492591		1.06577	1.45395	0.27181	0.0185444	0	0.170276	0.0196438	0.0120551	0.00160988	2.02395	0
Sejkora: 111 / 1 . ; JA377	Jáchymov - Eliáš	14.354	17.6	3.427	0.234	0.125	2.033	0.216	0.131	0	39.091	0.073	0	0.185	0.085	0.206	0	77.76		0.192174	0.234878	0.0421114	0.00329868	0.00173982	0.0255577	0.00535922	0.00233606	0	0.340158	0.00102857	0	0.0023107	0.00111719	0.00404075	0		0.505118		1.14136	1.39499	0.250108	0.0195915	0.0103332	0.151793	0.0318295	0.0138743	0	2.02027	0.00610889
Sejkora: 112 / 1 . ; JA381	Jáchymov	11.478	4.868	17.884	0.086	0	0.11	3.383	0.058	0	39.519	0.056	0	0.077	0.06	0	0	77.579		0.153669	0.0649651	0.219761	0.00121234	0	0.00138286	0.0839362	0.00103428	0	0.343883	0.00078904	0	0.000961752	0.000788605	0	0		0.524927		0.878234	0.371281	1.25595	0.0069286	0	0.00790315	0.479703	0.00591102	0	1.96532	0.00450943
Sejkora: 113 / 1 . ; JA381	Jáchymov	10.802	4.385	18.55	0.165	0	0	3.522	0.092	0	38.664	0	0	0	0	0	0	76.18		0.144619	0.0585193	0.227945	0.00232599	0	0	0.087385	0.00164059	0	0.336443	0	0	0	0	0	0		0.520794		0.833069	0.337096	1.31306	0.0133987	0	0	0.503376	0.00945051	0	1.93806	0
Sejkora: 114 / 1 . ; JA381	Jáchymov	9.176	4.844	20.039	0	0	0	4.295	0.089	0	38.505	0.057	0	0	0	0	0	77.005		0.12285	0.0646448	0.246242	0	0	0	0.106564	0.00158709	0	0.335059	0.00080313	0	0	0	0	0		0.5403		0.68212	0.358938	1.36725	0	0	0	0.591693	0.00881228	0	1.86041	0.00445935
Sejkora: 118 / 1 . ; JA362	Jáchymov	14.463	12.831	3.681	0	0	8.895	0	0	0.051	39.544	0.064	0	0.263	0.07	0.098	0	79.96		0.193633	0.171234	0.0452326	0	0	0.111823	0	0	0.000228495	0.3441	0.00090176	0	0.00328495	0.000920039	0.0019223	0		0.521923		1.113	0.984249	0.259996	0	0	0.642756	0	0	0.00131339	1.97788	0.0051833
Sejkora: 119 / 1 . ; JA362	Jáchymov	15.274	13.324	3.662	0	0.043	7.889	0	0	0.056	37.626	0	0.064	0.329	0	0.104	0	78.371		0.204491	0.177813	0.0449991	0	0.000598499	0.0991761	0	0	0.000250897	0.32741	0	0.000703761	0.00410931	0	0.00203999	0		0.527078		1.16391	1.01207	0.256124	0	0.00340651	0.564486	0	0	0.00142804	1.86354	0
Sejkora: 120 / 1 . ; JA362	Jáchymov	14.808	13.638	3.368	0.062	0	8.267	0.06	0	0	38.635	0.14	0	0.28	0	0.07	0	79.328		0.198252	0.182004	0.0413864	0.00087401	0	0.103928	0.00148867	0	0	0.33619	0.0019726	0	0.00349728	0	0.00137307	0		0.527933		1.12658	1.03424	0.23518	0.0049666	0	0.590576	0.00845944	0	0	1.91042	0.0112094
Sejkora: 121 / 1 . ; JA362	Jáchymov	10.874	13.106	4.365	0	0	13.067	0	0	0.072	40.117	0	0	0.085	0.053	0	0	81.739		0.145583	0.174904	0.0536377	0	0	0.164271	0	0	0.000322582	0.349086	0	0	0.00106167	0.000696601	0	0		0.538395		0.811205	0.974584	0.298875	0	0	0.915336	0	0	0.00179746	1.94515	0
Sejkora: 122 / 1 . ; JA362	Jáchymov	12.208	13.825	4.497	0	0	10.854	0.068	0	0	41.024	0.074	0.064	0.125	0	0.066	0	82.805		0.163443	0.184499	0.0552597	0	0	0.13645	0.00168716	0	0	0.356979	0.00104266	0.000703761	0.00156129	0	0.00129461	0		0.541339		0.905769	1.02246	0.306239	0	0	0.756182	0.00934993	0	0	1.97831	0.00577823
Sejkora: 123 / 1 . ; JA362	Jáchymov	10.389	12.14	4.825	0	0.086	14.447	0	0	0	41.155	0.166	0.061	0.199	0	0.112	0	83.58		0.13909	0.162012	0.0592902	0	0.001197	0.18162	0	0	0	0.358119	0.00233894	0.000670772	0.00248557	0	0.00219691	0		0.543209		0.768156	0.894751	0.327444	0	0.00661071	1.00304	0	0	0	1.9778	0.0129174
Sejkora: 133 / 1 . ; JA373	Jáchymov	8.182	12.225	7.877	0.48	0.058	10.318	0.131	0	0	38.837	0.139	0	0.127	0.51	0.509	0	79.393		0.109542	0.163147	0.0967935	0.00676653	0.000807278	0.129712	0.00325027	0	0	0.337948	0.00195851	0	0.00158627	0.00670314	0.00998419	0		0.510018		0.644342	0.959652	0.569353	0.0398017	0.00474852	0.762985	0.0191185	0	0	1.98786	0.0115202
Sejkora: 134 / 1 . ; JA373	Jáchymov	9.146	11.607	8.039	0.351	0.083	10.668	0.142	0	0	39.146	0.119	0.089	0.115	1.227	0.862	0	81.594		0.122448	0.154899	0.0987842	0.00494802	0.00115524	0.134112	0.00352319	0	0	0.340637	0.00167671	0.000978667	0.00143638	0.016127	0.0169084	0		0.51987		0.706608	0.893872	0.570051	0.0285534	0.00666652	0.773917	0.0203312	0	0	1.9657	0.00967575
Sejkora: 135 / 1 . ; JA373	Jáchymov	9.576	10.591	4.376	0.37	0	11.585	0.142	0.068	0	37.824	0.167	0.55	0.067	0.073	0.56	0	75.949		0.128205	0.14134	0.0537728	0.00521587	0	0.14564	0.00352319	0.00121261	0	0.329133	0.00235303	0.00604794	0.000836849	0.00095947	0.0109846	0		0.477697		0.805144	0.887635	0.3377	0.0327563	0	0.914638	0.0221261	0.00761534	0	2.067	0.0147773
Sejkora: 75 / 1 . ; JA382	Jáchymov	0.184	0.361	42.551	0.359	0	0	0.181	0	0	39.807	0.093	0	0	0	0	0	83.536		0.00246342	0.00481766	0.522872	0.0050608	0	0	0.00449082	0	0	0.346389	0.00131037	0	0	0	0	0		0.539705		0.0136932	0.0267794	2.90643	0.0281309	0	0	0.0249627	0	0	1.92544	0.00728382
Sejkora: 76 / 1 . ; JA382	Jáchymov	0.164	0.358	42.161	0.426	0	0.071	0.206	0	0.064	39.64	0	0	0	0	0.044	0	83.134		0.00219566	0.00477763	0.51808	0.00600529	0	0.000892572	0.0051111	0	0.000286739	0.344936	0	0	0	0	0.000863073	0		0.537062		0.0122648	0.0266876	2.89397	0.0335453	0	0.00498586	0.0285504	0	0.00160171	1.92679	0
Sejkora: 77 / 1 . ; JA382	Jáchymov	0.239	0.316	43.629	0.397	0	0	0.394	0	0	40.327	0	0	0	0	0	0	85.302		0.00319977	0.00421712	0.536118	0.00559648	0	0	0.00977561	0	0	0.350914	0	0	0	0	0	0		0.558907		0.0171751	0.0226359	2.87768	0.0300398	0	0	0.0524717	0	0	1.88357	0
Sejkora: 94 / 1 . ; JA376	Jáchymov	19.683	7.269	2.47	0	0.066	5.458	1.81	0.23	0	40.129	0.17	0	0.152	0	0.234	0	77.671		0.263519	0.0970072	0.0303517	0	0.000918626	0.0686149	0.0449082	0.00410147	0	0.349191	0.0023953	0	0.00189852	0	0.00458998	0		0.50532		1.56447	0.575915	0.180193	0	0.00545373	0.407355	0.266613	0.0243498	0	2.07309	0.0142205
Sejkora: 95 / 1 . ; JA376	Jáchymov	21.702	8.543	2.019	0	0	3.915	1.786	0.209	0	38.893	0.123	0	0	0.06	0.177	0	77.427		0.29055	0.114009	0.0248097	0	0	0.0492172	0.0443128	0.00372699	0	0.338435	0.00173307	0	0	0.000788605	0.00347191	0		0.522899		1.66696	0.654099	0.142339	0	0	0.282371	0.254233	0.0213827	0	1.94169	0.00994305
Sejkora: 96 / 1 . ; JA376	Jáchymov	20.979	8.056	2.03	0.057	0	4.501	1.805	0.239	0	38.873	0.188	0	0.086	0	0.226	0	77.04		0.28087	0.10751	0.0249449	0.000803525	0	0.056584	0.0447842	0.00426197	0	0.338261	0.00264892	0	0.00107416	0	0.00443306	0		0.515497		1.63456	0.625668	0.14517	0.00467622	0	0.329298	0.260627	0.0248031	0	1.96855	0.0154157
Sejkora: 97 / 1 . ; JA371	Jáchymov	12.961	11.551	3.915	0	0	11.846	0.059	0	0	38.779	0	0	0.135	0.094	0.171	0	79.511		0.173524	0.154152	0.048108	0	0	0.148921	0.00146386	0	0	0.337443	0	0	0.00168619	0.00123548	0.00335422	0		0.526169		0.989363	0.878911	0.274292	0	0	0.849088	0.00834633	0	0	1.92396	0
Sejkora: 98 / 1 . ; JA371	Jáchymov	13.483	9.728	3.965	0	0	11.426	0.124	0	0	38.854	0	0.079	0.093	0	0.166	0	77.918		0.180513	0.129823	0.0487224	0	0	0.143641	0.00307659	0	0	0.338096	0	0.000868705	0.0011616	0	0.00325614	0		0.505776		1.07071	0.770044	0.288996	0	0	0.852005	0.0182487	0	0	2.00541	0
Sejkora: 99 / 1 . ; JA371	Jáchymov	19.701	5.469	2.249	0.081	0	10.141	0.635	0.088	0.338	37.478	0	0	0.183	0.095	0.108	0	76.566		0.26376	0.0729856	0.027636	0.00114185	0	0.127487	0.0157551	0.00156926	0.00151434	0.326123	0	0	0.00228572	0.00124862	0.00211845	0		0.508766		1.5553	0.430368	0.162959	0.00673307	0	0.751742	0.0929019	0.00925333	0.0089295	1.92302	0
Sejkora: 57 / 1 . ; jach336	Jáchymov	6.915	15.166	13.743	0	0.114	1.005	0	0	0	41.269	0	0	0.207	0	0.269	0	78.688		0.0925792	0.202395	0.168876	0	0.00158672	0.0126343	0	0	0	0.359111	0	0	0.00258549	0	0.00527652	0		0.478071		0.580955	1.27007	1.05973	0	0.009957	0.0792829	0	0	0	2.2535	0
Sejkora: 58 / 1 . ; jach336	Jáchymov	7.398	16.316	14.452	0	0.143	0.47	0	0	0	41.624	0	0	0.136	0	0.243	0	80.782		0.0990457	0.217742	0.177588	0	0.00199036	0.00590858	0	0	0	0.3622	0	0	0.00169868	0	0.00476652	0		0.502275		0.591583	1.30054	1.0607	0	0.0118881	0.0352909	0	0	0	2.16336	0
Sejkora: 59 / 1 . ; jach336	Jáchymov	7.274	15.616	14.626	0.056	0.142	0.334	0.055	0	0	41.607	0	0	0.166	0	0.263	0	80.139		0.0973856	0.208401	0.179726	0.000789428	0.00197644	0.00419886	0.00136462	0	0	0.362052	0	0	0.00207339	0	0.00515883	0		0.493842		0.5916	1.266	1.0918	0.00479564	0.0120065	0.0255073	0.0082898	0	0	2.1994	0
Sejkora: 57 / 1 . ; jach336	Jáchymov	7.436	16.314	14.73	0	0.123	1.077	0	0	0	40.619	0	0	0.213	0	0.263	0	80.775		0.0995544	0.217716	0.181004	0	0.00171199	0.0135394	0	0	0	0.353455	0	0	0.00266043	0	0.00515883	0		0.513526		0.581594	1.27189	1.05742	0	0.0100014	0.079097	0	0	0	2.06487	0
Sejkora: 58 / 1 . ; jach336	Jáchymov	7.896	17.416	15.373	0	0.154	0.5	0	0	0	41.027	0	0	0.139	0	0.238	0	82.743		0.105713	0.232422	0.188905	0	0.00214346	0.00628572	0	0	0	0.357005	0	0	0.00173615	0	0.00466844	0		0.53547		0.592263	1.30216	1.05835	0	0.0120089	0.0352161	0	0	0	2.00014	0
Sejkora: 59 / 1 . ; jach336	Jáchymov	7.777	16.699	15.585	0.06	0.153	0.356	0.056	0	0	40.999	0	0	0.17	0	0.257	0	82.112		0.10412	0.222854	0.19151	0.000845816	0.00212954	0.00447543	0.00138943	0	0	0.356761	0	0	0.00212335	0	0.00504113	0		0.527324		0.592348	1.26784	1.08952	0.00481193	0.0121152	0.0254612	0.00790459	0	0	2.02965	0
Sejkora: 132 / 1 . ; JACH416	Jáchymov	5.155	5.397	31.892	0.065	0	0	0	0	0	39.738	0	0	0	0	0	0	82.247		0.069016	0.0720247	0.391893	0.000916301	0	0	0	0	0	0.345788	0	0	0	0	0	0		0.53385		0.38784	0.404747	2.20226	0.00514921	0	0	0	0	0	1.94318	0
Sejkora: 133 / 1 . ; JACH416	Jáchymov	5.531	5.423	30.968	0	0	0	0	0	0	40.045	0	0	0.112	0	0	0	82.079		0.07405	0.0723717	0.380539	0	0	0	0	0	0	0.34846	0	0	0.00139891	0	0	0		0.52696		0.421569	0.412014	2.16642	0	0	0	0	0	0	1.98379	0
Sejkora: 134 / 1 . ; JACH416	Jáchymov	4.725	5.225	31.953	0	0	0.127	0.08	0	0	40.166	0.058	0	0.099	0	0	0	82.433		0.0632591	0.0697293	0.392642	0	0	0.00159657	0.00198489	0	0	0.349513	0.00081722	0	0.00123654	0	0	0		0.529212		0.358603	0.395282	2.22581	0	0	0.00905065	0.011252	0	0	1.98132	0.00463266
Sejkora: 48 / 1 . ; JA305	Jáchymov - Rovnost	7.845	14.006	2.82	0.071	0	12.221	0.08	0	0	40.189	0.186	0	0.102	0	0.066	0	77.586		0.10503	0.186915	0.0346525	0.00100088	0	0.153636	0.00198489	0	0	0.349713	0.00262074	0	0.00127401	0	0.00129461	0		0.483219		0.652066	1.16044	0.215136	0.00621385	0	0.953826	0.012323	0	0	2.17115	0.0162705
Sejkora: 49 / 1 . ; JA305	Jáchymov - Rovnost	10.27	13.791	2.653	0.074	0.073	10.807	0.109	0	0	38.652	0.154	0	0.097	0	0.088	0	76.768		0.137497	0.184045	0.0326004	0.00104317	0.00101606	0.13586	0.00270442	0	0	0.336338	0.00216986	0	0.00121156	0	0.00172615	0		0.494765		0.833707	1.11596	0.197672	0.00632526	0.00616084	0.823781	0.0163982	0	0	2.03938	0.0131569
Sejkora: 50 / 1 . ; JA305	Jáchymov - Rovnost	9.145	13.156	2.66	0	0.078	12.5	0.064	0	0	39.978	0.17	0	0.061	0	0.077	0	77.889		0.122435	0.175571	0.0326864	0	0.00108565	0.157143	0.00158792	0	0	0.347877	0.0023953	0	0.000761908	0	0.00151038	0		0.490509		0.748823	1.07381	0.199913	0	0.00663994	0.961102	0.00971185	0	0	2.12765	0.0146499
Sejkora: 51 / 1 . ; JA305	Jáchymov - Rovnost	9.154	13.768	2.793	0	0.071	13.095	0.085	0	0	41.06	0.181	0	0.086	0	0.088	0	80.381		0.122555	0.183738	0.0343207	0	0.000988219	0.164623	0.00210895	0	0	0.357292	0.00255029	0	0.00107416	0	0.00172615	0		0.508335		0.723275	1.08436	0.202548	0	0.0058321	0.971543	0.0124462	0	0	2.1086	0.0150509
Sejkora: 52 / 1 . ; JA305	Jáchymov - Rovnost	10.341	13.563	2.8	0.057	0.114	10.623	0.103	0	0	38.171	0.127	0	0.07	0	0.16	0	76.129		0.138447	0.181003	0.0344067	0.000803525	0.00158672	0.133546	0.00255555	0	0	0.332153	0.00178943	0	0.00087432	0	0.00313845	0		0.492349		0.843592	1.10289	0.209649	0.00489608	0.00966826	0.813731	0.0155716	0	0	2.02389	0.0109034
Sejkora: 53 / 1 . ; JA305	Jáchymov - Rovnost	8.896	14.563	2.994	0.05	0.107	11.1	0	0	0	40.005	0.163	0	0.083	0	0.124	0	78.085		0.119101	0.194348	0.0367906	0.000704847	0.00148929	0.139543	0	0	0	0.348112	0.00229667	0	0.00103669	0	0.0024323	0		0.491977		0.726261	1.1851	0.224344	0.00429805	0.00908145	0.850912	0	0	0	2.12273	0.0140047
Sejkora: 54 / 1 . ; JA303	Jáchymov - Rovnost	6.798	12.259	8.635	0.089	0	9.319	0.101	0	0	38.442	0.142	0	0.096	0	0.17	0	76.051		0.0910128	0.1636	0.106108	0.00125463	0	0.117153	0.00250593	0	0	0.334511	0.00200078	0	0.00119907	0	0.0033346	0		0.481635		0.566899	1.01903	0.660923	0.0078148	0	0.729722	0.0156089	0	0	2.0836	0.0124624
Sejkora: 55 / 1 . ; JA303	Jáchymov - Rovnost	6.561	12.245	8.535	0.057	0	9.778	0.09	0	0	37.327	0.14	0	0.17	0.052	0.139	0	75.094		0.0878398	0.163414	0.104879	0.000803525	0	0.122924	0.00223301	0	0	0.324809	0.0019726	0	0.00212335	0.000683458	0.00272653	0		0.482092		0.546616	1.0169	0.652649	0.00500024	0	0.764937	0.0138957	0	0	2.02124	0.0122752
Sejkora: 56 / 1 . ; JA303	Jáchymov - Rovnost	6.773	11.983	8.121	0	0.058	10.275	0.084	0	0	38.348	0.126	0	0.135	0	0.169	0	76.072		0.0906781	0.159917	0.0997918	0	0.000807278	0.129172	0.00208414	0	0	0.333693	0.00177534	0	0.00168619	0	0.00331499	0		0.48245		0.56386	0.994406	0.620532	0	0.00501986	0.803222	0.0129597	0	0	2.07499	0.0110395
Sejkora: 57 / 1 . ; JA303	Jáchymov - Rovnost	5.727	12.272	9.705	0.074	0	10.307	0.069	0	0	36.489	0.133	0	0.15	0	0.122	0	75.048		0.0766741	0.163774	0.119256	0.00104317	0	0.129574	0.00171197	0	0	0.317517	0.00187397	0	0.00187354	0	0.00239307	0		0.492033		0.467493	0.998554	0.727123	0.00636038	0	0.790031	0.0104382	0	0	1.93595	0.0114259
Sejkora: 58 / 1 . ; JA303	Jáchymov - Rovnost	7.552	10.402	4.555	0	0.04	7.504	0.071	0	0	31.495	0.12	0	0.116	0.063	0.267	0	62.185		0.101107	0.138818	0.0559724	0	0.000556743	0.0943361	0.00176159	0	0	0.27406	0.0016908	0	0.00144887	0.000828035	0.00523729	0		0.392552		0.772693	1.06089	0.427757	0	0.00425479	0.720944	0.0134626	0	0	2.09445	0.0129216
Sejkora: 59 / 1 . ; JA303	Jáchymov - Rovnost	6.525	12.175	7.067	0	0	8.801	0.07	0	0	36.627	0.145	0	0.172	0.068	0.072	0	71.722		0.0873578	0.162479	0.0868402	0	0	0.110641	0.00173678	0	0	0.318717	0.00204305	0	0.00214833	0.000893753	0.0014123	0		0.449055		0.583611	1.08547	0.580152	0	0	0.73916	0.0116029	0	0	2.12925	0.013649
Sejkora: 60 / 1 . ; JA303	Jáchymov - Rovnost	7.856	12.461	7.318	0.089	0	8.812	0.11	0	0	38.232	0.117	0	0.192	0.075	0.127	0	75.389		0.105177	0.166296	0.0899245	0.00125463	0	0.11078	0.00272923	0	0	0.332684	0.00164853	0	0.00239814	0.000985756	0.00249114	0		0.476161		0.662658	1.04773	0.566559	0.00790463	0	0.697953	0.0171952	0	0	2.09603	0.0103864
Sejkora: 61 / 1 . ; JA304	Jáchymov - Rovnost	2.486	9.694	11.883	0.117	0	14.636	0.105	0	0	39.972	0.318	0	0.062	0	0.165	0	79.438		0.033283	0.12937	0.14602	0.00164934	0	0.183996	0.00260517	0	0	0.347825	0.00448062	0	0.000774398	0	0.00323653	0		0.496922		0.200935	0.781025	0.881545	0.00995734	0	1.11081	0.0157279	0	0	2.09987	0.0270502
Sejkora: 62 / 1 . ; JA304	Jáchymov - Rovnost	2.67	8.829	12.774	0.106	0	14.785	0.065	0	0	38.597	0.219	0	0.05	0	0.079	0	78.174		0.0357464	0.117826	0.156968	0.00149428	0	0.185869	0.00161273	0	0	0.33586	0.00308571	0	0.000624514	0	0.00154961	0		0.499516		0.214686	0.70764	0.942722	0.00897433	0	1.11629	0.00968573	0	0	2.01711	0.0185322
Sejkora: 63 / 1 . ; JA304	Jáchymov - Rovnost	6.442	11.447	8.298	0.052	0.08	11.251	0.058	0	0	38.219	0.142	0	0.173	0	0.568	0	76.73		0.0862466	0.152764	0.101967	0.000733041	0.00111349	0.141441	0.00143905	0	0	0.33257	0.00200078	0	0.00216082	0	0.0111415	0		0.485704		0.532711	0.943562	0.629808	0.0045277	0.00687756	0.873626	0.00888843	0	0	2.05415	0.012358
Sejkora: 64 / 1 . ; JA304	Jáchymov - Rovnost	3.342	9.427	11.315	0.128	0	15.56	0.117	0	0	38.761	0.066	0	0.053	0	0.084	0	78.853		0.0447433	0.125806	0.13904	0.00180441	0	0.195612	0.00290291	0	0	0.337287	0.00092994	0	0.000661985	0	0.00164769	0		0.509909		0.263243	0.74017	0.818029	0.0106161	0	1.15086	0.017079	0	0	1.9844	0.00547122
Sejkora: 65 / 1 . ; JA304	Jáchymov - Rovnost	3.426	10.375	13.254	0.09	0	12.153	0.059	0	0	39.073	0.266	0	0.098	0	0.281	0	79.075		0.0458679	0.138458	0.162867	0.00126872	0	0.152781	0.00146386	0	0	0.340002	0.00374794	0	0.00122405	0	0.0055119	0		0.502706		0.273726	0.826275	0.971941	0.00757137	0	0.91175	0.00873589	0	0	2.02903	0.0223666
Sejkora: 66 / 1 . ; JA304	Jáchymov - Rovnost	6.99	10.691	8.597	0	0	11.809	0.084	0	0	40.075	0.185	0	0.147	0.052	0.498	0	79.128		0.0935833	0.142675	0.105641	0	0	0.148456	0.00208414	0	0	0.348721	0.00260665	0	0.00183607	0.000683458	0.00976842	0		0.492439		0.570121	0.869193	0.643578	0	0	0.904412	0.0126968	0	0	2.12445	0.01588
Sejkora: 57 / 1 . ; JA253	Jáchymov - Rovnost	8.46	12.856	1.403	0	0	18.307	0.046	0	0	42.648	0.466	0	0.171	0	0.235	0	84.592		0.113264	0.171568	0.0172402	0	0	0.230145	0.00114131	0	0	0.37111	0.00656594	0	0.00213584	0	0.0046096	0		0.533358		0.63708	0.965022	0.0969718	0	0	1.29451	0.00641959	0	0	2.0874	0.0369317
Sejkora: 58 / 1 . ; JA253	Jáchymov - Rovnost	5.258	12.418	1.947	0	0	20.59	0.139	0	0	41.917	0.429	0.076	0.084	0	0.16	0	83.018		0.070395	0.165722	0.023925	0	0	0.258846	0.00344875	0	0	0.364749	0.00604461	0.000835716	0.00104918	0	0.00313845	0		0.522337		0.404308	0.951813	0.137411	0	0	1.48666	0.0198076	0	0	2.09491	0.0347167
Sejkora: 59 / 1 . ; JA253	Jáchymov - Rovnost	4.073	10.68	1.75	0	0	23.672	0	0	0	40.62	0.395	0.111	0.137	0	0.119	0	81.557		0.05453	0.142528	0.0215042	0	0	0.297591	0	0	0	0.353463	0.00556555	0.00122059	0.00171117	0	0.00233422	0		0.516153		0.316941	0.828405	0.124987	0	0	1.72967	0	0	0	2.05441	0.0323482
Sejkora: 38 / 1 . ; JA261	Jáchymov - Rovnost	4.028	11.751	1.974	0	0	22.204	0	0	0	41.545	0.359	0.09	0	0	0.299	0	82.25		0.0539276	0.156821	0.0242568	0	0	0.279136	0	0	0	0.361512	0.00505831	0.000989664	0	0	0.00586498	0		0.514141		0.314666	0.915046	0.141537	0	0	1.62875	0	0	0	2.10941	0.0295151
Sejkora: 39 / 1 . ; JA261	Jáchymov - Rovnost	7.231	11.597	1.536	0	0	19.209	0.062	0	0	41.178	0.338	0	0	0	0.486	0	81.637		0.0968099	0.154766	0.0188746	0	0	0.241485	0.00153829	0	0	0.358319	0.00476242	0	0	0	0.00953304	0		0.513473		0.565618	0.904229	0.110276	0	0	1.41089	0.00898758	0	0	2.0935	0.0278248
Sejkora: 40 / 1 . ; JA261	Jáchymov - Rovnost	7.44	11.731	1.659	0	0	19.327	0.061	0	0	42.418	0.296	0.093	0.062	0	0.501	0	83.588		0.099608	0.156554	0.020386	0	0	0.242968	0.00151348	0	0	0.369109	0.00417064	0.00102265	0.000774398	0	0.00982727	0		0.52103		0.573526	0.901411	0.117379	0	0	1.39897	0.00871437	0	0	2.12527	0.0240138
Sejkora: 62 / 1 . ; JA262	Jáchymov - Rovnost	16.264	16.707	1.618	0	0.081	2.02	0.258	0.077	0	39.904	0.199	0.077	0.128	0	0.317	0	77.65		0.217745	0.22296	0.0198822	0	0.00112741	0.0253943	0.00640129	0.0013731	0	0.347233	0.00280391	0.000846712	0.00159876	0	0.00621805	0		0.493511		1.32365	1.35535	0.120862	0	0.00685338	0.154369	0.0389127	0.00834694	0	2.11079	0.0170447
Sejkora: 63 / 1 . ; JA262	Jáchymov - Rovnost	14.817	16.105	1.694	0	0	2.347	0.263	0.057	0	38.631	0.11	0.12	0.217	0	0.351	0	74.712		0.198373	0.214926	0.0208161	0	0	0.0295052	0.00652534	0.00101645	0	0.336156	0.0015499	0.00131955	0.00271039	0	0.00688497	0		0.470146		1.26582	1.37145	0.132827	0	0	0.188272	0.0416382	0.00648598	0	2.14501	0.00988992
Sejkora: 60 / 1 . ; JA263	Jáchymov - Rovnost	13.416	15.167	1.886	0	0	9.183	0.195	0	0	41.643	0.206	0	0.11	0	0.154	0	81.96		0.179616	0.202409	0.0231754	0	0	0.115444	0.00483818	0	0	0.362365	0.00290254	0	0.00137393	0	0.00302076	0		0.525481		1.02544	1.15556	0.13231	0	0	0.659073	0.0276214	0	0	2.06876	0.0165708
Sejkora: 61 / 1 . ; JA263	Jáchymov - Rovnost	13.186	15.086	1.746	0	0	9.198	0.281	0	0	41.544	0.223	0	0	0	0.122	0	81.386		0.176536	0.201328	0.0214551	0	0	0.115632	0.00697194	0	0	0.361504	0.00314207	0	0	0	0.00239307	0		0.521923		1.01473	1.15723	0.123323	0	0	0.66465	0.0400745	0	0	2.07791	0.0180605
Sejkora: 35 / 1 . ; JA265	Jáchymov - Rovnost	3.965	13.952	1.757	0	0	19.884	0.121	0.082	0	42.21	0.155	0.225	0.089	0	0.253	0	82.693		0.0530841	0.186194	0.0215902	0	0	0.24997	0.00300215	0.00146226	0	0.367299	0.00218395	0.00247416	0.00111164	0	0.00496267	0		0.513841		0.309925	1.08707	0.126052	0	0	1.45942	0.0175277	0.00853726	0	2.14443	0.0127507
Sejkora: 36 / 1 . ; JA265	Jáchymov - Rovnost	2.586	11.871	1.701	0	0	23.549	0.091	0.066	0	43.578	0.083	0.159	0	0	0.089	0	83.773		0.0346218	0.158422	0.0209021	0	0	0.296045	0.00225782	0.00117694	0	0.379203	0.00116947	0.00174841	0	0	0.00174576	0		0.512249		0.202764	0.927805	0.122414	0	0	1.73379	0.013223	0.00689281	0	2.22081	0.00684904
Sejkora: 37 / 1 . ; JA265	Jáchymov - Rovnost	3.713	13.078	1.769	0	0	21.276	0.093	0.092	0	43.575	0.229	0.201	0	0	0.227	0	84.253		0.0497103	0.17453	0.0217377	0	0	0.26747	0.00230744	0.00164059	0	0.379177	0.00322661	0.00221025	0	0	0.00445267	0		0.515755		0.28915	1.01519	0.126442	0	0	1.55579	0.0134217	0.00954283	0	2.20556	0.0187683
Sejkora: 89 / 1 . ; JA269	Jáchymov - Rovnost	14.624	16.021	1.861	0	0	6.727	0.45	0	0	41.323	0.346	0	0.119	0	0.189	0	81.66		0.195789	0.213805	0.0228682	0	0	0.0845681	0.011165	0	0	0.359581	0.00487514	0	0.00148634	0	0.00370729	0		0.528195		1.11202	1.21435	0.129885	0	0	0.480323	0.0634142	0	0	2.04232	0.0276894
Sejkora: 90 / 1 . ; JA269	Jáchymov - Rovnost	14.506	15.012	1.867	0	0	6.726	0.576	0	0	41.965	0.381	0	0.101	0	0.169	0	81.303		0.194209	0.20034	0.0229419	0	0	0.0845555	0.0142912	0	0	0.365167	0.00536829	0	0.00126152	0	0.00331499	0		0.516338		1.12838	1.16401	0.133296	0	0	0.49128	0.0830343	0	0	2.12168	0.0311906
Sejkora: 91 / 1 . ; JA269	Jáchymov - Rovnost	12.005	15.392	2.204	0	0	9.207	0.588	0.053	0	41.549	0.347	0	0	0	0.176	0	81.521		0.160725	0.205411	0.027083	0	0	0.115745	0.014589	0.000945122	0	0.361547	0.00488923	0	0	0	0.00345229	0		0.523553		0.920966	1.17702	0.155188	0	0	0.663229	0.0835959	0.00541562	0	2.07169	0.0280157
Sejkora: 55 / 1 . ; JA270	Jáchymov - Rovnost	19.148	11.588	0.482	0	0.069	5.94	1.314	0.063	0	41.396	0.295	0.139	0.102	0	0.278	0	80.814		0.256357	0.154646	0.00592287	0	0.000960382	0.0746743	0.0326019	0.00112345	0	0.360216	0.00415655	0.00152848	0.00127401	0	0.00545305	0		0.525162		1.46444	0.883417	0.0338346	0	0.00548621	0.426579	0.186239	0.00641772	0	2.05774	0.0237444
Sejkora: 56 / 1 . ; JA270	Jáchymov - Rovnost	18.961	12.819	0.46	0	0.068	5.733	1.055	0	0	41.965	0.27	0.213	0.148	0	0.37	0	82.062		0.253853	0.171074	0.00565254	0	0.000946464	0.072072	0.0261758	0	0	0.365167	0.0038043	0.0023422	0.00184856	0	0.00725766	0		0.529774		1.43752	0.968756	0.0320092	0	0.00535963	0.408129	0.148228	0	0	2.06787	0.021543
Sejkora: 53 / 1 . ; JA264	Jáchymov - Rovnost	13.33	13.73	1.189	0	0	12.924	0.219	0	0	43.263	0.142	0.053	0.051	0	0.084	0	84.985		0.178464	0.183231	0.0146106	0	0	0.162473	0.00543365	0	0	0.376462	0.00200078	0.000582802	0.000637005	0	0.00164769	0		0.544213		0.983793	1.01007	0.0805415	0	0	0.895641	0.0299532	0	0	2.07526	0.0110294
Sejkora: 54 / 1 . ; JA264	Jáchymov - Rovnost	12.526	14.255	1.153	0	0	13.629	0.177	0	0	42.511	0.206	0	0.187	0.065	0.142	0	84.851		0.1677	0.190238	0.0141682	0	0	0.171336	0.00439158	0	0	0.369918	0.00290254	0	0.00233568	0.000854322	0.00278537	0		0.547834		0.918346	1.04176	0.0775867	0	0	0.938256	0.0240488	0	0	2.02571	0.0158946
Sejkora: 55 / 1 . ; JA264	Jáchymov - Rovnost	2.858	12.629	2.124	0	0	23.91	0.115	0	0	44.177	0.185	0	0	0	0.104	0	86.102		0.0382634	0.168538	0.0261	0	0	0.300583	0.00285329	0	0	0.384415	0.00260665	0	0	0	0.00203999	0		0.536338		0.214026	0.942716	0.14599	0	0	1.68131	0.0159598	0	0	2.15022	0.0145803
Sejkora: 56 / 1 . ; JA264	Jáchymov - Rovnost	8.939	13.319	1.382	0	0	19.789	0	0	0	47.261	0.252	0	0	0	0.616	0	91.558		0.119677	0.177746	0.0169822	0	0	0.248776	0	0	0	0.411251	0.00355068	0	0	0	0.012083	0		0.563182		0.637504	0.946834	0.090462	0	0	1.3252	0	0	0	2.19069	0.018914
Sejkora: 57 / 1 . ; JA264	Jáchymov - Rovnost	8.66	13.481	1.429	0	0	19.773	0.094	0	0	46.265	0.322	0	0.164	0	0.578	0	90.766		0.115942	0.179908	0.0175597	0	0	0.248575	0.00233225	0	0	0.402584	0.00453698	0	0.00204841	0	0.0113376	0		0.564317		0.616364	0.956422	0.0933503	0	0	1.32147	0.0123986	0	0	2.1402	0.0241193
Sejkora: 58 / 1 . ; JA264	Jáchymov - Rovnost	2.88	11.794	2.024	0	0	27.156	0.098	0	0	44.182	0.184	0	0.143	0	0.097	0	88.558		0.0385579	0.157395	0.0248712	0	0	0.34139	0.0024315	0	0	0.384459	0.00259256	0	0.00178611	0	0.00190268	0		0.564645		0.204861	0.836249	0.132142	0	0	1.81383	0.0129187	0	0	2.04266	0.0137745
Sejkora: 48 / 1 . ; JA266	Jáchymov - Rovnost	9.018	16.231	1.914	0	0	14.336	0.105	0.087	0	43.131	0.17	0	0.106	0	0.492	0	85.59		0.120735	0.216608	0.0235195	0	0	0.180224	0.00260517	0.00155143	0	0.375313	0.0023953	0	0.00132397	0	0.00965073	0		0.543691		0.666193	1.19521	0.129777	0	0	0.994447	0.0143749	0.00856052	0	2.07092	0.0132169
Sejkora: 49 / 1 . ; JA266	Jáchymov - Rovnost	7.805	17.007	2.4	0	0	15.27	0.088	0.096	0	44.692	0.169	0	0.12	0	0.399	0	88.046		0.104495	0.226964	0.0294915	0	0	0.191966	0.00218338	0.00171192	0	0.388897	0.00238121	0	0.00149883	0	0.00782651	0		0.555099		0.564735	1.22661	0.159385	0	0	1.03747	0.0118	0.00925196	0	2.10177	0.0128691
Sejkora: 50 / 1 . ; JA266	Jáchymov - Rovnost	8.521	16.547	2.059	0	0	13.821	0.075	0.098	0	43.031	0.174	0	0.056	0	0.437	0	84.819		0.114081	0.220825	0.0253012	0	0	0.17375	0.00186084	0.00174758	0	0.374443	0.00245166	0	0.000699456	0	0.00857189	0		0.535818		0.638728	1.23638	0.14166	0	0	0.972811	0.0104187	0.00978459	0	2.09648	0.0137267
Sejkora: 51 / 1 . ; JA266	Jáchymov - Rovnost	18.859	18.492	0.33	0	0	2.929	0	0	0	42.546	0.3	0.469	0.424	0	0.138	0	84.487		0.252488	0.246782	0.00405508	0	0	0.0368217	0	0	0	0.370223	0.004227	0.00515725	0.00529588	0	0.00270691	0		0.540146		1.40233	1.37064	0.0225221	0	0	0.20451	0	0	0	2.05624	0.023477
Sejkora: 52 / 1 . ; JA266	Jáchymov - Rovnost	17.728	18.497	0.512	0	0.056	4.157	0	0	0	43.135	0.258	0.487	0.454	0.057	0.113	0	85.454		0.237346	0.246849	0.00629152	0	0.000779441	0.0522595	0	0	0	0.375348	0.00363522	0.00535518	0.00567059	0.000749175	0.00221653	0		0.543524		1.31004	1.36249	0.0347262	0	0.00430215	0.288448	0	0	0	2.07175	0.0200647
Sejkora: 45 / 1 . ; JA267	Jáchymov - Rovnost	9.954	14.498	1.157	0	0.114	5.67	0.064	0.4	0	35.302	0.186	0.556	0.251	0.193	0.261	0	68.606		0.133266	0.193481	0.0142174	0	0.00158672	0.07128	0.00158792	0.007133	0	0.307188	0.00262074	0.00611392	0.00313506	0.00253668	0.00511959	0		0.415418		0.962397	1.39725	0.102673	0	0.0114587	0.514758	0.0114673	0.0515119	0	2.2184	0.018926
Sejkora: 46 / 1 . ; JA267	Jáchymov - Rovnost	12.107	15.133	1.194	0	0.222	4.792	0.052	0	0	36.848	0.209	0.685	0.222	0.109	0.285	0	71.858		0.162091	0.201955	0.014672	0	0.00308993	0.0602423	0.00129018	0	0	0.32064	0.00294481	0.00753244	0.00277284	0.00143263	0.00559036	0		0.44334		1.09684	1.36659	0.0992829	0	0.020909	0.407649	0.00873042	0	0	2.16972	0.019927
Sejkora: 47 / 1 . ; JA267	Jáchymov - Rovnost	11.417	14.014	1.012	0	0.185	4.636	0	0	0	35.731	0.125	0.537	0.344	0.106	0.328	0	68.435		0.152853	0.187021	0.0124356	0	0.00257494	0.0582812	0	0	0	0.310921	0.00176125	0.00590499	0.00429666	0.0013932	0.00643382	0		0.413166		1.10986	1.35796	0.0902948	0	0.0186966	0.42318	0	0	0	2.2576	0.0127885
Sejkora: 42 / 1 . ; JA268	Jáchymov - Rovnost	12.578	16.803	0.745	0	0	8.294	0.608	0.129	0	43.529	0.093	0.098	0.125	0.051	0.211	0	83.264		0.168396	0.224242	0.00915465	0	0	0.104268	0.0150852	0.00230039	0	0.378777	0.00131037	0.00107763	0.00156129	0.000670314	0.00413883	0		0.521145		0.969383	1.29086	0.0526992	0	0	0.600221	0.0868387	0.0132423	0	2.18045	0.00754322
Sejkora: 43 / 1 . ; JA268	Jáchymov - Rovnost	13.786	16.845	0.713	0	0	7.012	0.616	0.135	0	43.103	0.073	0.105	0.157	0	0.298	0	82.843		0.184569	0.224802	0.00876143	0	0	0.0881509	0.0152837	0.00240739	0	0.37507	0.00102857	0.00115461	0.00196098	0	0.00584536	0		0.521567		1.06162	1.29304	0.0503948	0	0	0.507035	0.0879102	0.013847	0	2.15736	0.00591623
Sejkora: 44 / 1 . ; JA268	Jáchymov - Rovnost	11.263	17.322	0.86	0	0	9.128	0.675	0.189	0	42.668	0.069	0.053	0.094	0.054	0.315	0	82.69		0.150791	0.231168	0.0105678	0	0	0.114752	0.0167476	0.00337034	0	0.371284	0.00097221	0.000582802	0.00117409	0.000709745	0.00617882	0		0.524026		0.863264	1.32341	0.0604996	0	0	0.656945	0.0958781	0.0192949	0	2.12557	0.00556581
Sejkora: 1 / 1 . ; JPL 54	Jáchymov - Rovnost	5.896	10.092	9.278	0	0	13.119	0	0	0	39.306	0.13	0	0.153	0	0	0	77.974		0.0789367	0.134681	0.114009	0	0	0.164925	0	0	0	0.342029	0.0018317	0	0.00191101	0	0	0		0.492552		0.480782	0.820306	0.6944	0	0	1.00451	0	0	0	2.08321	0.0111564
Sejkora: 2 / 1 . ; JPL 54	Jáchymov - Rovnost	6.1	9.963	8.735	0	0	13.144	0	0	0	39.194	0.188	0	0.24	0	0	0	77.564		0.0816678	0.132959	0.107337	0	0	0.165239	0	0	0	0.341055	0.00264892	0	0.00299767	0	0	0		0.487203		0.502878	0.818711	0.660936	0	0	1.01747	0	0	0	2.10008	0.016311
Sejkora: 3 / 1 . ; JPL 54	Jáchymov - Rovnost	6.257	10.645	9.695	0	0	10.722	0	0	0	39.616	0.179	0	0.079	0	0	0	77.193		0.0837698	0.142061	0.119133	0	0	0.134791	0	0	0	0.344727	0.00252211	0	0.000986733	0	0	0		0.479755		0.523828	0.888335	0.744963	0	0	0.842873	0	0	0	2.15564	0.0157712
Sejkora: 4 / 1 . ; JPL 54	Jáchymov - Rovnost	3.051	9.327	14.411	0	0	13.919	0	0	0	40.058	0.117	0	0.374	0	0	0	81.257		0.0408473	0.124472	0.177084	0	0	0.174982	0	0	0	0.348573	0.00164853	0	0.00467137	0	0	0		0.517385		0.236849	0.721736	1.0268	0	0	1.01461	0	0	0	2.02116	0.00955882
Sejkora: 5 / 1 . ; JPL 54	Jáchymov - Rovnost	5.096	9.818	8.701	0	0	14.068	0	0	0	39.849	0.17	0	0.099	0	0	0	77.801		0.0682261	0.131024	0.106919	0	0	0.176855	0	0	0	0.346754	0.0023953	0	0.00123654	0	0	0		0.483024		0.423743	0.813775	0.664059	0	0	1.09842	0	0	0	2.15364	0.0148769
Sejkora: 6 / 1 . ; JPL 54	Jáchymov - Rovnost	5.967	10.485	9.042	0	0	13.355	0	0	0	40.578	0.154	0	0.173	0	0	0	79.754		0.0798872	0.139926	0.111109	0	0	0.167892	0	0	0	0.353098	0.00216986	0	0.00216082	0	0	0		0.498814		0.480463	0.841551	0.668241	0	0	1.00974	0	0	0	2.12363	0.0130501
Sejkora: 7 / 1 . ; JPL 54	Jáchymov - Rovnost	6.147	10.359	9.331	0	0	11.994	0	0	0	40.584	0.204	0	0.176	0	0	0	78.795		0.0822971	0.138244	0.11466	0	0	0.150782	0	0	0	0.35315	0.00287436	0	0.00219829	0	0	0		0.485984		0.508024	0.853388	0.707805	0	0	0.930783	0	0	0	2.18001	0.0177436
Sejkora: 8 / 1 . ; JPL 54	Jáchymov - Rovnost	1.498	6.736	14.507	0	0	18.639	0	0	0	39.122	0.24	0	0	0	0	0	80.742		0.0200555	0.0898941	0.178264	0	0	0.234319	0	0	0	0.340428	0.0033816	0	0	0	0	0		0.522532		0.115144	0.516106	1.02346	0	0	1.34529	0	0	0	1.95449	0.0194147
Sejkora: 9 / 1 . ; JPL 54	Jáchymov - Rovnost	1.869	7.327	11.57	0	0	19.483	0	0	0	40.235	0.103	0	0	0	0	0	80.587		0.0250225	0.0977812	0.142174	0	0	0.244929	0	0	0	0.350113	0.00145127	0	0	0	0	0		0.509907		0.147218	0.575289	0.836468	0	0	1.44102	0	0	0	2.05987	0.00853845
Sejkora: 10 / 1 . ; JPL 54	Jáchymov - Rovnost	1.204	6.602	12.326	0	0	20.008	0	0	0	40.085	0.166	0	0.106	0	0	0	80.497		0.0161194	0.0881059	0.151463	0	0	0.251529	0	0	0	0.348808	0.00233894	0	0.00132397	0	0	0		0.507218		0.0953398	0.521112	0.895848	0	0	1.4877	0	0	0	2.06307	0.0138339
Sejkora: 11 / 1 . ; JPL 54	Jáchymov - Rovnost	1.621	6.478	11.945	0	0	19.907	0	0	0	39.009	0.14	0	0	0	0	0	79.1		0.0217022	0.086451	0.146782	0	0	0.25026	0	0	0	0.339445	0.0019726	0	0	0	0	0		0.505194		0.128874	0.513373	0.871634	0	0	1.48612	0	0	0	2.01573	0.0117139
Sejkora: 86 / 1 . ; DY233	Jáchymov - Rovnost	8.31	11.24	10.4	0	0	14.05	0	0	0	43.41	0.19	0	0	0	0.19	0	87.79		0.111256	0.150001	0.127796	0	0	0.176629	0	0	0	0.377741	0.0026771	0	0	0	0.00372691	0		0.565682		0.590026	0.795507	0.677747	0	0	0.93672	0	0	0	2.00329	0.0141975
Sejkora: 87 / 1 . ; DY233	Jáchymov - Rovnost	8.75	13.24	11.43	0	0.07	10.78	0	0	0	42.06	0.11	0	0.15	0	0.15	0	86.74		0.117146	0.176692	0.140453	0	0.000974301	0.13552	0	0	0	0.365994	0.0015499	0	0.00187354	0	0.0029423	0		0.570786		0.615711	0.928678	0.738209	0	0.00512083	0.712281	0	0	0	1.92363	0.00814613
Sejkora: 88 / 1 . ; DY233	Jáchymov - Rovnost	8.44	11.2	10.38	0	0.08	14.25	0	0	0	45.14	0.16	0	0	0	0.26	0	89.91		0.112996	0.149468	0.127551	0	0.00111349	0.179143	0	0	0	0.392795	0.0022544	0	0	0	0.00509998	0		0.570271		0.594434	0.786298	0.671	0	0.00585767	0.94241	0	0	0	2.06636	0.0118596
Sejkora: 89 / 1 . ; DY233	Jáchymov - Rovnost	7.67	11.14	11.46	0	0.11	14.38	0	0	0	44.49	0.16	0	0.12	0	0.2	0	89.73		0.102687	0.148667	0.140822	0	0.00153104	0.180777	0	0	0	0.387139	0.0022544	0	0.00149883	0	0.00392306	0		0.574484		0.536241	0.77635	0.735382	0	0.00799522	0.944032	0	0	0	2.02167	0.0117726
Sejkora: 90 / 1 . ; DY233	Jáchymov - Rovnost	7.37	11.15	11.71	0	0.04	14.04	0.06	0	0	43.62	0.18	0	0.14	0	0.17	0	88.48		0.0986708	0.1488	0.143894	0	0.000556743	0.176503	0.00148867	0	0	0.379568	0.0025362	0	0.00174864	0	0.0033346	0		0.569914		0.519399	0.783279	0.757451	0	0.00293067	0.929104	0.0078363	0	0	1.99803	0.0133505
Sejkora: 91 / 1 . ; DY233	Jáchymov - Rovnost	6.69	11.26	11.65	0	0.14	14.21	0	0	0	42.98	0.16	0	0.1	0	0.17	0	87.36		0.0895669	0.150268	0.143157	0	0.0019486	0.17864	0	0	0	0.373999	0.0022544	0	0.00124903	0	0.0033346	0		0.563581		0.476774	0.799895	0.762038	0	0.0103726	0.950921	0	0	0	1.99084	0.0120004
Sejkora: 92 / 1 . ; DY233	Jáchymov - Rovnost	5.97	11.07	12.86	0	0.06	15.22	0	0	0	44.4	0.16	0	0	0	0.06	0	89.8		0.0799274	0.147733	0.158025	0	0.000835115	0.191337	0	0	0	0.386356	0.0022544	0	0	0	0.00117692	0		0.577858		0.41495	0.766968	0.820402	0	0.00433557	0.993344	0	0	0	2.0058	0.0117039
Sejkora: 93 / 1 . ; DY233	Jáchymov - Rovnost	8.44	10.66	10.33	0	0.07	14.33	0	0	0	45.38	0.21	0	0.15	0	0.23	0	89.8		0.112996	0.142261	0.126936	0	0.000974301	0.180149	0	0	0	0.394883	0.0029589	0	0.00187354	0	0.00451152	0		0.563317		0.601773	0.757626	0.676012	0	0.00518874	0.9594	0	0	0	2.10299	0.0157579
Sejkora: 94 / 1 . ; DY233	Jáchymov - Rovnost	8.1	10.52	10.97	0	0.09	14.05	0	0	0	43.87	0.2	0	0.11	0	0.21	0	88.12		0.108444	0.140393	0.134801	0	0.00125267	0.176629	0	0	0	0.381744	0.002818	0	0.00137393	0	0.00411921	0		0.561519		0.579379	0.75007	0.720193	0	0.00669259	0.943665	0	0	0	2.03952	0.0150556
Sejkora: 95 / 1 . ; DY233	Jáchymov - Rovnost	9.68	11.12	10.46	0	0.18	12.74	0	0	0	43.39	0.26	0	0.11	0	0.24	0	88.18		0.129597	0.1484	0.128534	0	0.00250534	0.16016	0	0	0	0.377567	0.0036634	0	0.00137393	0	0.00470767	0		0.569197		0.683055	0.782155	0.677448	0	0.0132046	0.844138	0	0	0	1.99	0.0193083
Sejkora: 96 / 1 . ; DY233	Jáchymov - Rovnost	7.44	11.12	11.34	0	0.09	14.45	0	0	0	43.96	0.18	0	0.06	0	0.2	0	88.84		0.099608	0.1484	0.139347	0	0.00125267	0.181657	0	0	0	0.382527	0.0025362	0	0.000749417	0	0.00392306	0		0.570265		0.524009	0.78069	0.733066	0	0.00658995	0.955646	0	0	0	2.01236	0.0133422
Sejkora: 97 / 1 . ; DY233	Jáchymov - Rovnost	5.18	10.76	12.31	0	0.04	15.41	0.05	0	0	42	0.16	0	0.12	0	0.07	0	86.1		0.0693507	0.143596	0.151267	0	0.000556743	0.193726	0.00124056	0	0	0.365472	0.0022544	0	0.00149883	0	0.00137307	0		0.559736		0.371697	0.769625	0.810739	0	0.00298396	1.03831	0.00664898	0	0	1.95881	0.0120828
Sejkora: 98 / 1 . ; DY233	Jáchymov - Rovnost	6.3	13.65	12.51	0	0	10.67	0.06	0	0	42.53	0.14	0	0.12	0	0.06	0	86.04		0.0843455	0.182164	0.153724	0	0	0.134137	0.00148867	0	0	0.370084	0.0019726	0	0.00149883	0	0.00117692	0		0.55586		0.455217	0.983146	0.829658	0	0	0.723945	0.00803443	0	0	1.99736	0.0106462
Sejkora: 99 / 1 . ; DY233	Jáchymov - Rovnost	6.16	13.59	13.36	0	0	11.14	0	0	0	43.01	0.13	0	0	0	0.08	0	87.47		0.0824711	0.181363	0.164169	0	0	0.140046	0	0	0	0.37426	0.0018317	0	0	0	0.00156922	0		0.568049		0.435549	0.95782	0.867016	0	0	0.739614	0	0	0	1.97656	0.00967364
Sejkora: 100 / 1 . ; DY233	Jáchymov - Rovnost	10.53	13.43	10.3	0	0	9.29	0	0	0	43.8	0.15	0	0.11	0	0.14	0	87.75		0.140977	0.179228	0.126568	0	0	0.116789	0	0	0	0.381135	0.0021135	0	0.00137393	0	0.00274614	0		0.563561		0.750463	0.954081	0.673756	0	0	0.6217	0	0	0	2.02889	0.0112508
Sejkora: 101 / 1 . ; DY233	Jáchymov - Rovnost	4.62	11.99	15.33	0	0.05	13.19	0.08	0	0	44.78	0.12	0	0.12	0	0.12	0	90.4		0.0618534	0.16001	0.188377	0	0.000695929	0.165817	0.00198489	0	0	0.389662	0.0016908	0	0.00149883	0	0.00235384	0		0.578739		0.320628	0.829444	0.976487	0	0.00360748	0.859545	0.0102891	0	0	2.01989	0.00876458
Sejkora: 102 / 1 . ; DY233	Jáchymov - Rovnost	6.18	13.06	13.12	0	0	11.77	0.07	0	0	43.06	0.15	0	0	0	0.12	0	87.53		0.0827389	0.17429	0.16122	0	0	0.147966	0.00173678	0	0	0.374695	0.0021135	0	0	0	0.00235384	0		0.567952		0.437038	0.920624	0.851587	0	0	0.781576	0.00917393	0	0	1.97919	0.0111638
Sejkora: 103 / 1 . ; DY233	Jáchymov - Rovnost	4.46	11.6	15.7	0	0	13.47	0	0	0	42.74	0.19	0	0	0	0.13	0	88.29		0.0597112	0.154806	0.192924	0	0	0.169337	0	0	0	0.371911	0.0026771	0	0	0	0.00254999	0		0.576778		0.310577	0.805193	1.00345	0	0	0.880776	0	0	0	1.93442	0.0139244
Sejkora: 104 / 1 . ; DY233	Jáchymov - Rovnost	5.24	12.56	14.99	0	0	11.74	0	0	0	43.16	0.17	0	0.07	0	0.13	0	88.06		0.070154	0.167617	0.184199	0	0	0.147589	0	0	0	0.375566	0.0023953	0	0.00087432	0	0.00254999	0		0.569559		0.369518	0.88288	0.970219	0	0	0.777384	0	0	0	1.97819	0.0126166
Sejkora: 105 / 1 . ; DY233	Jáchymov - Rovnost	7.86	12.87	11.35	0	0	11.43	0.07	0	0	42.25	0.16	0	0.08	0	0.24	0	86.31		0.105231	0.171754	0.13947	0	0	0.143692	0.00173678	0	0	0.367647	0.0022544	0	0.000999223	0	0.00470767	0		0.561884		0.561848	0.917028	0.744657	0	0	0.767195	0.009273	0	0	1.96293	0.0120367
Sejkora: 106 / 1 . ; DY233	Jáchymov - Rovnost	6.32	13.15	13.08	0	0	11.04	0	0	0	42.69	0.13	0	0.13	0	0.08	0	86.62		0.0846132	0.175491	0.160729	0	0	0.138789	0	0	0	0.371476	0.0018317	0	0.00162374	0	0.00156922	0		0.559622		0.453592	0.940766	0.861628	0	0	0.744013	0	0	0	1.99139	0.00981932
Sejkora: 107 / 1 . ; DY233	Jáchymov - Rovnost	6.99	13.43	12.56	0	0	10.55	0	0	0	41.51	0.13	0	0.14	0	0.11	0	85.42		0.0935833	0.179228	0.154339	0	0	0.132629	0	0	0	0.361208	0.0018317	0	0.00174864	0	0.00215768	0		0.559779		0.501538	0.960528	0.827142	0	0	0.710792	0	0	0	1.93581	0.00981656
Sejkora: 6 / 1 . ; P298	Jáchymov	4.206	8.276	13.685	0	0	17.709	0	0	0	43.739	0.139	0	0.057	0	0.187	0	87.998		0.0563106	0.110446	0.168163	0	0	0.222628	0	0	0	0.380604	0.00195851	0	0.000711946	0	0.00366806	0		0.557547		0.302991	0.594278	0.904836	0	0	1.19789	0	0	0	2.04792	0.0105382
Sejkora: 10 / 1 . ; P298	Jáchymov	6.384	9.413	11.205	0	0.072	15.432	0	0	0	43.662	0.115	0	0	0	0.362	0	86.645		0.0854701	0.12562	0.137688	0	0.00100214	0.194002	0	0	0	0.379934	0.00162035	0	0	0	0.00710074	0		0.543783		0.471531	0.693032	0.759615	0	0.00552871	1.07029	0	0	0	2.09606	0.00893933
Sejkora: 11 / 1 . ; P298	Jáchymov	2.704	8.98	15.664	0	0	16.502	0	0	0	43.958	0.166	0	0	0	0.166	0	88.14		0.0362016	0.119841	0.192481	0	0	0.207454	0	0	0	0.38251	0.00233894	0	0	0	0.00325614	0		0.555978		0.19534	0.64665	1.03861	0	0	1.1194	0	0	0	2.06398	0.0126207
Sejkora: 12 / 1 . ; P298	Jáchymov	6.314	9.628	11.841	0	0.05	16.922	0	0	0	46.123	0.12	0	0.129	0	0.332	0	91.459		0.0845329	0.128489	0.145504	0	0.000695929	0.212734	0	0	0	0.401349	0.0016908	0	0.00161125	0	0.00651228	0		0.571955		0.443389	0.673945	0.763191	0	0.00365026	1.11582	0	0	0	2.10514	0.00886853
Sejkora: 13 / 1 . ; P298	Jáchymov	6.671	8.866	12.084	0	0.041	17.474	0	0	0	46.958	0.187	0	0	0	0.302	0	92.583		0.0893125	0.11832	0.14849	0	0.000570662	0.219673	0	0	0	0.408615	0.00263483	0	0	0	0.00592382	0		0.576366		0.464874	0.615857	0.772893	0	0.00297031	1.14341	0	0	0	2.12685	0.0137144
Sejkora: 5 / 1 . ; GA444	Běloves near Náchod	1.514	29.949	0	0	0	6.946	0.62	0.095	0	42.666	0	0	0.142	0	0	0	81.932		0.0202697	0.399679	0	0	0	0.0873212	0.0153829	0.00169409	0	0.371267	0	0	0.00177362	0	0	0		0.522653		0.116347	2.29414	0	0	0	0.501219	0.0882972	0.00972397	0	2.13105	0
Sejkora: 14 / 1 . ; GA444	Běloves near Náchod	1.087	29.32	0	0	0	6.856	0.597	0	0	42.709	0	0	0.097	0	0	0	80.666		0.0145529	0.391285	0	0	0	0.0861898	0.0148123	0	0	0.371641	0	0	0.00121156	0	0	0		0.50684		0.0861393	2.31603	0	0	0	0.51016	0.0876743	0	0	2.19975	0
Sejkora: 15 / 1 . ; GA444	Běloves near Náchod	1.365	31.724	0	0	0	3.591	0.867	0	0	41.751	0	0	0.085	0.063	0	0	79.446		0.0182749	0.423367	0	0	0	0.045144	0.0215113	0	0	0.363305	0	0	0.00106167	0.000828035	0	0		0.508297		0.107859	2.49874	0	0	0	0.266443	0.126961	0	0	2.14425	0
Sejkora: 3 / 1 . ; KO209	Ľubietová-Svätodušná	18.805	1.186	0.069	0	0	1.917	13.694	0	0	44.688	0.176	0	0	0	0	0	80.535		0.251765	0.0158276	0.00084788	0	0	0.0240994	0.339764	0	0	0.388862	0.00247984	0	0	0	0	0		0.632304		1.19451	0.0750947	0.00402281	0	0	0.114341	1.61203	0	0	1.84498	0.0117657
Sejkora: 18 / 1 . ; KO209	Ľubietová-Svätodušná	17.769	1.046	0	0	0	1.795	15.421	0	0	45.981	0.185	0	0	0	0	0	82.197		0.237894	0.0139592	0	0	0	0.0225657	0.382613	0	0	0.400113	0.00260665	0	0	0	0	0		0.657033		1.08622	0.0637375	0	0	0	0.103035	1.74701	0	0	1.82691	0.0119019
Sejkora: 19 / 1 . ; KO209	Ľubietová-Svätodušná	20.15	1.172	0	0	0.884	2.113	10.794	0	0	42.681	0.058	0	0	0	0	0	77.852		0.269772	0.0156407	0	0	0.012304	0.0265634	0.267812	0	0	0.371397	0.00081722	0	0	0	0	0		0.592092		1.36687	0.0792481	0	0	0.0623418	0.134591	1.35694	0	0	1.88179	0.00414068
Sejkora: 20 / 1 . ; KO209	Ľubietová-Svätodušná	17.639	0.632	0	0	0	2.679	15.461	0	0	45.582	0.179	0	0	0	0	0	82.172		0.236154	0.00843425	0	0	0	0.0336789	0.383606	0	0	0.396641	0.00252211	0	0	0	0	0		0.661873		1.07039	0.038229	0	0	0	0.152653	1.73873	0	0	1.79781	0.0114317
Sejkora: 4 / 1 . ; KO210	Ľubietová-Svätodušná	23.23	1.335	0	0	0.043	0.319	11.013	0	0	43.926	0.187	0	0	0.062	0.042	0	80.157		0.311007	0.017816	0	0	0.000598499	0.00401029	0.273246	0	0	0.382231	0.00263483	0	0	0.000814892	0.000823843	0		0.606678		1.53792	0.0880996	0	0	0.00295956	0.0198307	1.35119	0	0	1.89012	0.0130291
Sejkora: 16 / 1 . ; KO210	Ľubietová-Svätodušná	20.312	0.757	0	0	0.043	0.241	14.438	0	0	45.211	0.347	0	0	0	0	0	81.349		0.271941	0.0101024	0	0	0.000598499	0.00302972	0.358224	0	0	0.393413	0.00488923	0	0	0	0	0		0.643895		1.26701	0.0470686	0	0	0.00278849	0.0141159	1.66902	0	0	1.83297	0.0227796
Sejkora: 17 / 1 . ; KO210	Ľubietová-Svätodušná	25.9	0.241	0	0	0	0.476	10.434	0	0	44.063	0.194	0	0	0	0	0	81.308		0.346754	0.00321622	0	0	0	0.005984	0.25888	0	0	0.383423	0.00273346	0	0	0	0	0		0.614834		1.69194	0.0156931	0	0	0	0.0291982	1.26317	0	0	1.87086	0.0133376
Sejkora: 6 / 1 . ; P298	Jáchymov	4.206	8.276	13.685	0	0	17.709	0	0	0	43.739	0.139	0	0.057	0	0.187	0	87.998		0.0563106	0.110446	0.168163	0	0	0.222628	0	0	0	0.380604	0.00195851	0	0.000711946	0	0.00366806	0		0.557547		0.302991	0.594278	0.904836	0	0	1.19789	0	0	0	2.04792	0.0105382
Sejkora: 10 / 1 . ; P298	Jáchymov	6.384	9.413	11.205	0	0.072	15.432	0	0	0	43.662	0.115	0	0	0	0.362	0	86.645		0.0854701	0.12562	0.137688	0	0.00100214	0.194002	0	0	0	0.379934	0.00162035	0	0	0	0.00710074	0		0.543783		0.471531	0.693032	0.759615	0	0.00552871	1.07029	0	0	0	2.09606	0.00893933
Sejkora: 11 / 1 . ; P298	Jáchymov	2.704	8.98	15.664	0	0	16.502	0	0	0	43.958	0.166	0	0	0	0.166	0	88.14		0.0362016	0.119841	0.192481	0	0	0.207454	0	0	0	0.38251	0.00233894	0	0	0	0.00325614	0		0.555978		0.19534	0.64665	1.03861	0	0	1.1194	0	0	0	2.06398	0.0126207
Sejkora: 12 / 1 . ; P298	Jáchymov	6.314	9.628	11.841	0	0.05	16.922	0	0	0	46.123	0.12	0	0.129	0	0.332	0	91.459		0.0845329	0.128489	0.145504	0	0.000695929	0.212734	0	0	0	0.401349	0.0016908	0	0.00161125	0	0.00651228	0		0.571955		0.443389	0.673945	0.763191	0	0.00365026	1.11582	0	0	0	2.10514	0.00886853
Sejkora: 13 / 1 . ; P298	Jáchymov	6.671	8.866	12.084	0	0.041	17.474	0	0	0	46.958	0.187	0	0	0	0.302	0	92.583		0.0893125	0.11832	0.14849	0	0.000570662	0.219673	0	0	0	0.408615	0.00263483	0	0	0	0.00592382	0		0.576366		0.464874	0.615857	0.772893	0	0.00297031	1.14341	0	0	0	2.12685	0.0137144
Sejkora: 1 / 1 . ; ZL 342	Zálesí	17.244	16.15	0	0	0.379	0	2.728	0.109	0	41.606	0	0	0.089	0.058	0	0	78.363		0.230866	0.215527	0	0	0.00527514	0	0.0676849	0.00194374	0	0.362043	0	0	0.00111164	0.000762318	0	0		0.519353		1.33358	1.24497	0	0	0.0304714	0	0.390977	0.0112279	0	2.09131	0
Sejkora: 22 / 1 . ; ZL 342	Zálesí	18.474	14.189	0	0	0.099	0	3.362	0	0	40.638	0.076	0	0.07	0.069	0	0	76.977		0.247333	0.189357	0	0	0.00137794	0	0.0834152	0	0	0.35362	0.00107084	0	0.00087432	0.000906896	0	0		0.521483		1.42286	1.08934	0	0	0.00792704	0	0.479873	0	0	2.03431	0.00616036
Sejkora: 23 / 1 . ; ZL 342	Zálesí	15.715	15.863	0	0	0.184	0	2.741	0.121	0	40.473	0	0	0	0.056	0	0	75.153		0.210395	0.211697	0	0	0.00256102	0	0.0680075	0.00215773	0	0.352184	0	0	0	0.000736032	0	0		0.492661		1.28118	1.2891	0	0	0.015595	0	0.414124	0.0131393	0	2.14459	0
Sejkora: 2 / 1 . ; ZL 343	Zálesí	21.291	15.214	0.114	0	0.059	0.15	0.306	0.316	0	38.153	0	0	0.208	0.152	0.073	0	76.036		0.285048	0.203036	0.00140085	0	0.000821196	0.00188572	0.00759222	0.00563507	0	0.331996	0	0	0.00259798	0.0019978	0.00143192	0		0.499783		1.71103	1.21874	0.00840872	0	0.00492931	0.0113192	0.0455731	0.0338251	0	1.99284	0
Stevko M28 PD19; 122 / 1 .	Poniky-Drienok	4.022	13.614	12.58	0.142	0	6.634	0.358	0	0	39.971	0	0	0.052	0	0	0	77.373		0.0538472	0.181683	0.154585	0.00200176	0	0.0833989	0.0088824	0	0	0.347816	0	0	0.000649495	0	0	0		0.484398		0.333489	1.12521	0.957381	0.0123974	0	0.516511	0.055011	0	0	2.15411	0
Stevko M28 PD19; 123 / 1 .	Poniky-Drienok	2.79	11.055	12.574	0	0	10.435	0.119	0	0	40.98	0	0	0.04	0	0	0	77.993		0.037353	0.147533	0.154511	0	0	0.131183	0.00295253	0	0	0.356596	0	0	0.000499612	0	0	0		0.473532		0.236645	0.934674	0.978883	0	0	0.831093	0.0187054	0	0	2.25917	0
Stevko M28 PD19; 124 / 1 .	Poniky-Drienok	3.252	10.737	13.031	0	0	9.593	0.31	0	0	40.179	0.087	0	0.071	0	0	0	77.26		0.0435383	0.143289	0.160127	0	0	0.120598	0.00769147	0	0	0.349626	0.00122583	0	0.000886811	0	0	0		0.475243		0.274838	0.904519	1.01081	0	0	0.761281	0.0485529	0	0	2.20703	0.00773813
Stevko M28 PD19; 125 / 1 .	Poniky-Drienok	3.632	10.997	12.876	0	0	9.417	0.233	0	0	41.233	0.098	0	0.048	0	0	0	78.534		0.0486258	0.146759	0.158222	0	0	0.118385	0.00578101	0	0	0.358797	0.00138082	0	0.000599534	0	0	0		0.477772		0.305328	0.921517	0.993497	0	0	0.743357	0.0362997	0	0	2.25294	0.00867036
Stevko M28 PD19; 126 / 1 .	Poniky-Drienok	3.076	11.079	15.498	0	0	8.569	0.223	0.057	0	40.425	0	0	0.045	0	0	0	78.972		0.041182	0.147853	0.190441	0	0	0.107725	0.00553289	0.00101645	0	0.351766	0	0	0.000562063	0	0	0		0.492734		0.250736	0.900199	1.1595	0	0	0.655879	0.0336869	0.00618865	0	2.14172	0
Stevko M28 PD19; 127 / 1 .	Poniky-Drienok	2.868	10.951	15.276	0.116	0	7.497	0.148	0	0	40.021	0	0	0	0	0	0	76.877		0.0383973	0.146145	0.187713	0.00163524	0	0.0942481	0.00367206	0	0	0.348251	0	0	0	0	0	0		0.471811		0.244148	0.929258	1.19357	0.0103977	0	0.599275	0.0233487	0	0	2.21435	0
Stevko M28 PD19; 128 / 1 .	Poniky-Drienok	2.781	10.56	15.188	0	0	9.272	0.203	0.05	0	39.812	0	0	0.035	0	0	0	77.901		0.0372325	0.140927	0.186632	0	0	0.116562	0.00503667	0.000891625	0	0.346432	0	0	0.00043716	0	0	0		0.48639		0.229646	0.86922	1.15113	0	0	0.718944	0.0310656	0.00549944	0	2.13676	0
M28 PD19; 1 / 1 .	Poniky-Drienok	4.684	15.147	16.2	0	0	0.979	0.457	0.063		38.656	0		0	0.06	0		76.246		0.0627102	0.202142	0.199068	0	0	0.0123074	0.0113387	0.00112345	0	0.336373	0	0	0	0.000788605	0	0		0.487566		0.385857	1.24378	1.22487	0	0	0.0757279	0.0697673	0.00691259	0	2.06971	0
M28 PD19; 2 / 1 .	Poniky-Drienok	5.448	17.517	14.859	0.133	0	1.232	0.632	0.082		38.818	0.206		0.302	0.083	0		79.312		0.0729388	0.23377	0.182589	0.00187489	0	0.015488	0.0156807	0.00146226	0	0.337783	0.00290254	0	0.00377207	0.0010909	0	0		0.522342		0.418914	1.34263	1.04868	0.0107682	0	0.0889533	0.0900599	0.00839832	0	1.94001	0.0166704
M28 PD19; 3 / 1 .	Poniky-Drienok	4.603	17.985	14.764	0.297	0	1.153	0.792	0		39.536	0		0	0.127	0		79.257		0.0616258	0.240016	0.181422	0.00418679	0	0.0144949	0.0196505	0	0	0.344031	0	0	0	0.00166921	0	0		0.521395		0.354582	1.381	1.04386	0.0240899	0	0.0834004	0.113065	0	0	1.97948	0
M28 PD19; 4 / 1 .	Poniky-Drienok	4.7	16.045	18.083	0.227	0	2.152	0.538	0		40.482	0		0	0.058	0		82.285		0.0629244	0.214126	0.222206	0.0032	0	0.0270537	0.0133484	0	0	0.352262	0	0	0	0.000762318	0	0		0.542858		0.347739	1.18332	1.22798	0.0176842	0	0.149507	0.0737674	0	0	1.94671	0
M28 PD19; 5 / 1 .	Poniky-Drienok	3.187	12.925	16.681	0	0.107977	7.253	0.293	0		39.555	0		0	0.321	0		80.323		0.0426681	0.172488	0.204978	0	0.00150289	0.0911806	0.00726968	0	0	0.344196	0	0	0	0.00421904	0	0		0.520088		0.246121	0.994957	1.18237	0	0.00866906	0.525953	0.0419334	0	0	1.98541	0
M28 PD19; 6 / 1 .	Poniky-Drienok	3.279	13.268	16.313	0	0	6.519	0.276	0.061		39.355	0		0	0.396	0		79.467		0.0438998	0.177066	0.200456	0	0	0.0819532	0.00684789	0.00108778	0	0.342456	0	0	0	0.00520479	0	0		0.510223		0.258121	1.04111	1.17864	0	0	0.481867	0.0402641	0.00639592	0	2.01357	0
M28 PD19; 7 / 1 .	Poniky-Drienok	3.454	13.366	18.392	0	0	4.366	0.488	0		40.293	0.196		0.394	0.525	0		81.474		0.0462427	0.178374	0.226003	0	0	0.0548869	0.0121079	0	0	0.350618	0.00276164	0	0.00492117	0.0069003	0	0		0.517614		0.268015	1.03382	1.30987	0	0	0.318115	0.070175	0	0	2.03212	0.016006
M28 PD19; 8 / 1 .	Poniky-Drienok	2.667	11.589	18.206	0	0	8.291	0.156	0		40.741	0.143		0.165	0.551	0		82.509		0.0357063	0.154659	0.223718	0	0	0.10423	0.00387055	0	0	0.354516	0.00201487	0	0.0020609	0.00724202	0	0		0.522183		0.205136	0.888533	1.28528	0	0	0.598812	0.0222367	0	0	2.03673	0.0115757
M28 PD19; 9 / 1 .	Poniky-Drienok	1.385	10.739	14.476	0	0	15.873	0.319	0.085		44.038	0		0.153	0.326	0.089		87.483		0.0185426	0.143315	0.177883	0	0	0.199546	0.00791477	0.00151576	0	0.383206	0	0	0.00191101	0.00428475	0.00174576	0		0.547202		0.101659	0.785718	0.975231	0	0	1.094	0.0433922	0.00831007	0	2.1009	0
M28 PD19; 10 / 1 .	Poniky-Drienok	3.246	13.419	17.44	0	0	6.538	0.237	0.075		42.954	0		0.15	0.55	0.079		84.688		0.043458	0.179081	0.214305	0	0	0.0821921	0.00588025	0.00133744	0	0.373773	0	0	0.00187354	0.00722888	0.00154961	0		0.524916		0.248371	1.02348	1.22479	0	0	0.469744	0.0336068	0.00764372	0	2.13619	0
M28 PD19; 11 / 1 .	Poniky-Drienok	4.448	13.731	15.639	0	0	8.061	0.297	0.07		41.792	0		0	0.256	0		84.294		0.0595506	0.183245	0.192174	0	0	0.101338	0.00736892	0.00124827	0	0.363662	0	0	0	0.00336472	0	0		0.543676		0.328599	1.01114	1.06041	0	0	0.559184	0.0406616	0.00688796	0	2.00668	0
M28 PD19; 12 / 1 .	Poniky-Drienok	3.648	12.705	15.525	0	0	8.751	0.274	0.083		40.933	0		0	0.372	0		82.291		0.04884	0.169552	0.190773	0	0	0.110013	0.00679827	0.0014801	0	0.356187	0	0	0	0.00488935	0	0		0.525976		0.278568	0.967072	1.08811	0	0	0.627477	0.0387751	0.008442	0	2.03158	0
M28 PD19; 13 / 1 .	Poniky-Drienok	2.883	12.511	16.117	0	0	7.596	0.318	0		40.609	0		0.203	0.594	0		80.831		0.0385981	0.166963	0.198048	0	0	0.0954926	0.00788996	0	0	0.353368	0	0	0.00253553	0.00780719	0	0		0.506992		0.228395	0.987965	1.1719	0	0	0.565054	0.0466869	0	0	2.09097	0
M28 PD19; 14 / 1 .	Poniky-Drienok	4.481	17.407	16.014	0.217	0	2.385	0.693	0		41.189	0		0	0.44	0		82.826		0.0599924	0.232302	0.196782	0.00305904	0	0.0299829	0.0171942	0	0	0.358415	0	0	0	0.0057831	0	0		0.539313		0.333716	1.29221	1.09463	0.0170163	0	0.166784	0.0956448	0	0	1.99373	0
M28 PD19; 27 / 1 .	Poniky-Drienok	2.339	12.294	13.851	0	0	13.554	0.402	0		42.964	0		0	0.204	0		85.608		0.0313149	0.164067	0.170203	0	0	0.170393	0.0099741	0	0	0.37386	0	0	0	0.00268126	0	0		0.545953		0.172075	0.901548	0.935261	0	0	0.936308	0.0548075	0	0	2.05435	0
M28 PD19; 28 / 1 .	Poniky-Drienok	1.098	8.909	16.478	0	0	15.837	0.158	0.065		41.796	0.118		0	0.151	0.063		84.673		0.0147002	0.118894	0.202484	0	0	0.199094	0.00392017	0.00115911	0	0.363696	0.00166262	0	0	0.00198466	0.00123576	0		0.539091		0.0818055	0.661633	1.12681	0	0	1.10794	0.0218154	0.00645037	0	2.02394	0.00925235
N1 D2; 109 / 1 .	Dobšiná-Zemberg	2.222	22.26	0	0.943	12.487	0	0.335	0.036	0	38.856	0	0	0.075	0	0	0	77.214		0.0297485	0.297067	0	0.0132934	0.173801	0	0.00831175	0.00064197	0	0.338113	0	0	0.000936772	0	0	0		0.522222		0.170896	1.70656	0	0.0763664	0.998434	0	0.0477484	0.00368791	0	1.94235	0
N1 D2; 110 / 1 .	Dobšiná-Zemberg	1.171	22.589	0	1.066	12.482	0	0.339	0.094	0	38.718	0.057	0	0.095	0	0	0	76.611		0.0156775	0.301458	0	0.0150273	0.173732	0	0.00841099	0.00167625	0	0.336913	0.00080313	0	0.00118658	0	0	0		0.514305		0.0914489	1.75844	0	0.0876561	1.0134	0	0.0490623	0.00977778	0	1.96525	0.00468475
N1 D2; 111 / 1 .	Dobšiná-Zemberg	1.146	21.043	0	1.021	13.773	0	0.282	0	0	39.026	0	0	0.046	0	0	0	76.337		0.0153428	0.280826	0	0.014393	0.191701	0	0.00699675	0	0	0.339593	0	0	0.000574553	0	0	0		0.509259		0.0903834	1.65432	0	0.0847877	1.12929	0	0.0412173	0	0	2.00051	0
N1 D2; 112 / 1 .	Dobšiná-Zemberg	1.367	24.392	0	1.251	11.378	0	0.465	0	0	40.341	0	0	0.095	0.095	0	0	79.384		0.0183016	0.325519	0	0.0176353	0.158366	0	0.0115372	0	0	0.351036	0	0	0.00118658	0.00124862	0	0		0.531359		0.103329	1.83785	0	0.099567	0.894117	0	0.0651379	0	0	1.98191	0
N1 D2; 113 / 1 .	Dobšiná-Zemberg	1.34	22.585	0.143	1.205	12.838	0.127	0.281	0.034	0	39.877	0	0	0.058	0	0	0	78.488		0.0179401	0.301404	0.0017572	0.0169868	0.178687	0.00159657	0.00697194	0.000606305	0	0.346998	0	0	0.000724437	0	0	0		0.525344		0.102448	1.72118	0.0100346	0.097004	1.0204	0.0091173	0.0398136	0.00346233	0	1.98155	0
N1 D2; 114 / 1 .	Dobšiná-Zemberg	1.19	21.806	0	0.889	12.679	0	0.342	0.061	0	40.3	0	0	0.09	0.073	0	0	77.43		0.0159319	0.291008	0	0.0125322	0.176474	0	0.00848543	0.00108778	0	0.350679	0	0	0.00112413	0.00095947	0	0		0.504431		0.0947518	1.73071	0	0.0745325	1.04954	0	0.0504653	0.00646936	0	2.08559	0
Stevko N1 S2; 106 / 1 .	Čierna Lehota	30.016	3.535	0		2.541	0	0.937	0.624	0	44.79	0	0	0	0	0	0	82.443		0.401859	0.0471757	0	0	0.0353671	0	0.0232481	0.0111275	0	0.389749	0	0	0	0	0	0		0.50765		2.37482	0.278789	0	0	0.209005	0	0.137386	0.0657587	0	2.30326	0
Stevko N1 S2; 107 / 1 .	Čierna Lehota	28.01	4.341	0		2.777	0	1.012	0.671	0	44.702	0	0	0	0	0	0	81.513		0.375003	0.0579321	0	0	0.0386519	0	0.0251089	0.0119656	0	0.388984	0	0	0	0	0	0		0.496696		2.26499	0.349905	0	0	0.233454	0	0.151656	0.0722713	0	2.34943	0
Stevko N1 S2; 108 / 1 .	Čierna Lehota	31.71	3.029	0		1.984	0	1.002	0.631	0	43.992	0	0	0	0	0.036	0	82.384		0.424539	0.040423	0	0	0.0276145	0	0.0248608	0.0112523	0	0.382805	0	0	0	0	0.000706151	0		0.517437		2.46139	0.234365	0	0	0.160103	0	0.144138	0.0652387	0	2.21943	0
Stevko N1 S2; 109 / 1 .	Čierna Lehota	29.521	4.221	0		2.605	0	1.015	0.688	0	44.632	0	0	0.098	0.061	0	0	82.841		0.395232	0.0563306	0	0	0.0362579	0	0.0251834	0.0122688	0	0.388375	0	0	0.00122405	0.000801749	0	0		0.513004		2.31128	0.329416	0	0	0.212033	0	0.14727	0.0717465	0	2.27118	0
Stevko N1 S1; 114 / 1 .	Čierna Lehota	27.264	5.786	0		2.12	0	1.243	0.563	0	44.483	0	0	0	0.076	0.04	0	81.575		0.365015	0.0772161	0	0	0.0295074	0	0.0308403	0.0100397	0	0.387078	0	0	0	0.0009989	0.000784612	0		0.502579		2.17885	0.460919	0	0	0.176136	0	0.184092	0.0599291	0	2.31055	0
Stevko N1 S1; 115 / 1 .	Čierna Lehota	29.524	4.985	0		1.7	0	1.052	0.372	0	44.216	0	0	0	0.054	0	0	81.903		0.395272	0.0665265	0	0	0.0236616	0	0.0261014	0.00663369	0	0.384755	0	0	0	0.000709745	0	0		0.511562		2.31803	0.390137	0	0	0.138761	0	0.153069	0.0389026	0	2.25635	0
Stevko N1 S1; 116 / 1 .	Čierna Lehota	29.924	4.832	0.1		1.534	0	1.003	0.384	0	44.598	0	0	0	0	0.049	0	82.424		0.400628	0.0644846	0.00122881	0	0.0213511	0	0.0248856	0.00684768	0	0.388079	0	0	0	0	0.00096115	0		0.512578		2.34478	0.377414	0.00719196	0	0.124963	0	0.14565	0.0400779	0	2.27134	0
Stevko N1 S1; 117 / 1 .	Čierna Lehota	29.036	5.53	0		1.541	0	0.934	0.378	0	44.06	0	0	0	0	0	0	81.479		0.388739	0.0737997	0	0	0.0214485	0	0.0231736	0.00674068	0	0.383397	0	0	0	0	0	0		0.507161		2.2995	0.436546	0	0	0.126874	0	0.137079	0.0398731	0	2.2679	0
Stevko N1 S3; 118 / 1 .	Čierna Lehota	22.872	0.523	2.313		9.809	0	1.302	0.261	0	44.25	0	0	0	0	0	0	81.33		0.306214	0.00697961	0.0284224	0	0.136527	0	0.0323042	0.00465428	0	0.38505	0	0	0	0	0	0		0.510448		1.79968	0.0410205	0.167044	0	0.802398	0	0.189858	0.0273541	0	2.26302	0
Stevko N1 S3; 119 / 1 .	Čierna Lehota	23.788	0.361	0.968		11.007	0	1.866	0.208	0	44.537	0	0	0	0	0	0	82.735		0.318478	0.00481766	0.0118949	0	0.153202	0	0.0462977	0.00370916	0	0.387548	0	0	0	0	0	0		0.53469		1.78689	0.0270306	0.0667391	0	0.859574	0	0.259764	0.0208111	0	2.17443	0
Stevko N1 S3; 120 / 1 .	Čierna Lehota	24.138	0.346	1.296		9.518	0	1.738	0.153	0	43.958	0	0	0	0	0	0	81.147		0.323164	0.00461748	0.0159254	0	0.132477	0	0.0431218	0.00272837	0	0.38251	0	0	0	0	0	0		0.519305		1.8669	0.026675	0.0920002	0	0.765313	0	0.249113	0.0157617	0	2.20974	0
Stevko N1 S3; 121 / 1 .	Čierna Lehota	25.068	0.926	3.72		6.835	0	0.993	0.142	0	44.127	0.033	0	0	0	0	0	81.844		0.335615	0.0123578	0.0457118	0	0.0951335	0	0.0246375	0.00253221	0	0.38398	0.00046497	0	0	0	0	0		0.513455		1.96092	0.0722036	0.267084	0	0.555843	0	0.143951	0.0147951	0	2.24351	0.00271671
N1 S2; 87 / 1 .	Čierna Lehota	25.609	0	0	4.353	5.466	0	1.593	0.764	0	39.563	0	0	0.053	0.054	0	0	77.455		0.342858	0	0	0.061364	0.076079	0	0.0395242	0.013624	0	0.344266	0	0	0.000661985	0.000709745	0	0		0.519825		1.97869	0	0	0.354142	0.439065	0	0.228101	0.0786266	0	1.98682	0
N1 S2; 88 / 1 .	Čierna Lehota	25.317	0	0.174	6.016	5.616	0	1.235	0.502	0	40.296	0	0	0	0.056	0	0	79.212		0.338948	0	0.00213813	0.0848072	0.0781668	0	0.0306418	0.00895191	0	0.350644	0	0	0	0.000736032	0	0		0.534702		1.9017	0	0.0119962	0.475819	0.438562	0	0.171919	0.0502256	0	1.96732	0
N1 S2; 89 / 1 .	Čierna Lehota	21.934	0.129	0	4.471	11.355	0	1.121	0.089	0	40.272	0	0	0	0	0	0	79.371		0.293656	0.00172155	0	0.0630274	0.158045	0	0.0278133	0.00158709	0	0.350435	0	0	0	0	0	0		0.544264		1.61864	0.00948922	0	0.347409	0.871152	0	0.153308	0.0087481	0	1.93161	0
M1 ESD; 86 / 1 .	Špania Dolina-shaft Ludovika	9.83	21.217	1.685	0	0	3.856	0.677	0	0	38.124	0	0	0.055	0.117	0	0	75.561		0.131606	0.283148	0.0207055	0	0	0.0484755	0.0167972	0	0	0.331744	0	0	0.000686966	0.00153778	0	0		0.500732		0.788481	1.6964	0.124051	0	0	0.290428	0.100636	0	0	1.98755	0
M1 ESD; 87 / 1 .	Špania Dolina-shaft Ludovika	8.8	17.528	2.002	0	0	10.886	0.76	0.145	0	36.776	0.107	0	0.084	0.056	0	0	77.144		0.117816	0.233917	0.0246008	0	0	0.136853	0.0188565	0.00258571	0	0.320014	0.00150763	0	0.00104918	0.000736032	0	0		0.532043		0.664322	1.31897	0.138715	0	0	0.771663	0.106325	0.0145799	0	1.80444	0.00850099
M1 ESD; 88 / 1 .	Špania Dolina-shaft Ludovika	10.572	21.821	1.859	0	0	1.892	0.638	0.042	0	39.017	0	0	0.057	0.1	0	0	75.998		0.14154	0.291208	0.0228436	0	0	0.0237852	0.0158295	0.000748965	0	0.339514	0	0	0.000711946	0.00131434	0	0		0.495206		0.857459	1.76416	0.138388	0	0	0.144092	0.0958966	0.00453729	0	2.05681	0
M1 ESD; 89 / 1 .	Špania Dolina-shaft Ludovika	9.712	18.53	5.124	0	0	3.823	0.438	0.03	0	40.387	0	0	0.109	0.326	0.171	0.054	78.704		0.130026	0.247289	0.0629643	0	0	0.0480606	0.0108673	0.000534975	0	0.351436	0	0	0.00136144	0.00428475	0.00335422	0.00114655		0.499207		0.781395	1.48609	0.378386	0	0	0.288822	0.0653074	0.00321495	0	2.11196	0
M1 ESD; 90 / 1 .	Špania Dolina-shaft Ludovika	8.048	17.098	2.155	0	0	3.887	2.914	0	0	40.456	0.044	0	0.124	0	0	0	74.726		0.107748	0.228178	0.0264809	0	0	0.0488652	0.0722998	0	0	0.352036	0.00061996	0	0.0015488	0	0	0		0.483572		0.66845	1.41558	0.164283	0	0	0.303151	0.448536	0	0	2.18397	0.00384613
M1 ESD; 91 / 1 .	Špania Dolina-shaft Ludovika	6.629	20.522	2.445	0	0	4.568	1.215	0	0	40.548	0	0	0.046	0	0	0	75.973		0.0887502	0.273873	0.0300445	0	0	0.0574263	0.0301456	0	0	0.352837	0	0	0.000574553	0	0	0		0.480239		0.554412	1.71085	0.187684	0	0	0.358736	0.188316	0	0	2.20413	0
M1 ESD; 92 / 1 .	Špania Dolina-shaft Ludovika	8.616	18.405	3.85	0	0	4.267	0.541	0	0	39.073	0	0	0.103	0.21	0.115	0	75.18		0.115352	0.245621	0.0473093	0	0	0.0536423	0.0134229	0	0	0.340002	0	0	0.0012865	0.00276012	0.00225576	0		0.475348		0.728009	1.55015	0.298577	0	0	0.338546	0.0847139	0	0	2.14581	0
M1 ESD; 93 / 1 .	Špania Dolina-shaft Ludovika	8.767	18.06	4.634	0	0	3.803	0.404	0.039	0	39.022	0	0	0.056	0.3	0.168	0.047	75.3		0.117374	0.241017	0.0569432	0	0	0.0478092	0.0100237	0.000695467	0	0.339558	0	0	0.000699456	0.00394303	0.00329537	0.000997919		0.473167		0.744182	1.52811	0.361034	0	0	0.303123	0.063553	0.00440944	0	2.15289	0
M1 ESD; 176 / 1 .	Špania Dolina-shaft Ludovika	8.064	20.006	2.874	0	0	5.727	1.122	0.079	0	36.469	0.054	0	0.131	0.838	0.6	0.136	76.1		0.107962	0.266987	0.0353161	0	0	0.0719966	0.0278382	0.00140877	0	0.317342	0.00076086	0	0.00163623	0.0110142	0.0117692	0.0028876		0.5101		0.634948	1.5702	0.207701	0	0	0.423427	0.163722	0.00828525	0	1.86636	0.00447477
M1 ESD; 177 / 1 .	Špania Dolina-shaft Ludovika	6.343	15.024	1.831	0.081	0	20.992	0.796	0.124	0	30.159	0.05	0	0.043	0.143	0.084	0	75.67		0.0849212	0.2005	0.0224996	0.00114185	0	0.2639	0.0197497	0.00221123	0	0.262435	0.0007045	0	0.000537082	0.00187951	0.00164769	0		0.592712		0.429827	1.01483	0.113881	0.00577946	0	1.33572	0.0999627	0.0111921	0	1.32831	0.00356581
Stevko M24 DJ1; 123 / 1 .	Dúbrava-vein Jozef	26.653	1.418	0	0.156	0	0	2.97	1.384	0	40.11	0	0	0	0	0	0	72.691		0.356835	0.0189237	0	0.00219912	0	0	0.0736892	0.0246802	0	0.349025	0	0	0	0	0	0		0.451647		2.37022	0.125698	0	0.0146074	0	0	0.48947	0.163935	0	2.31835	0
Stevko M24 DJ1; 124 / 1 .	Dúbrava-vein Jozef	25.848	0.576	0.177	0.282	0.158	1.422	4.129	0.582	0	40.568	0	0	0.16	0	0	0	73.902		0.346057	0.00768691	0.002175	0.00397534	0.00219914	0.0178766	0.102445	0.0103785	0	0.353011	0	0	0.00199845	0	0	0		0.482416		2.15203	0.0478026	0.0135257	0.0247214	0.0136758	0.111169	0.637077	0.0645409	0	2.19527	0
Stevko M24 DJ1; 125 / 1 .	Dúbrava-vein Jozef	24.65	0.614	0	0.262	0	0.85	3.994	0.436	0	39.972	0	0	0	0	0	0	70.778		0.330018	0.00819403	0	0.0036934	0	0.0106857	0.0990959	0.00777497	0	0.347825	0	0	0	0	0	0		0.451687		2.1919	0.0544228	0	0.0245307	0	0.070972	0.658171	0.0516395	0	2.31017	0
Stevko M24 DJ1; 126 / 1 .	Dúbrava-vein Jozef	24.161	0.623	0.234	0.338	0.113	2.265	4.618	0.177	0	40.463	0.109	0	0.036	0.063	0	0	73.2		0.323472	0.00831414	0.00287542	0.00476476	0.0015728	0.0284743	0.114578	0.00315635	0	0.352097	0.00153581	0	0.00044965	0.000828035	0	0		0.484051		2.00478	0.0515285	0.017821	0.0295305	0.00974773	0.176475	0.71012	0.0195621	0	2.18219	0.00951848
Stevko M24 DJ1; 127 / 1 .	Dúbrava-vein Jozef	25.134	0.411	0.244	0.366	0	1.449	4.589	0.397	0	40.192	0	0	0.114	0	0	0	72.896		0.336498	0.00548493	0.0029983	0.00515948	0	0.018216	0.113859	0.0070795	0	0.349739	0	0	0.00142389	0	0	0		0.482216		2.09345	0.0341233	0.0186533	0.0320986	0	0.113327	0.708346	0.0440436	0	2.17583	0
Stevko M24 DJ1; 128 / 1 .	Dúbrava-vein Jozef	25.813	0.508	0.212	0.242	0.127	2.05	4.604	0.297	0	40.962	0	0	0	0	0	0	74.815		0.345589	0.00677943	0.00260508	0.00341146	0.00176766	0.0257714	0.114231	0.00529625	0	0.356439	0	0	0	0	0	0		0.500155		2.07289	0.040664	0.0156257	0.0204624	0.0106027	0.154581	0.685172	0.0317677	0	2.13797	0
Stevko M24 DJ2; 129 / 1 .	Dúbrava-vein Jozef	20.17	9.03	0.78	1.85	0.105	1.231	0.831	0.124	0	39.072	0	0	0.111	0	0	0	73.304		0.270039	0.120508	0.00958474	0.0260793	0.00146145	0.0154754	0.0206181	0.00221123	0	0.339993	0	0	0.00138642	0	0	0		0.463767		1.74682	0.77954	0.0620014	0.168701	0.00945379	0.100107	0.133374	0.0143039	0	2.19934	0
Stevko M24 DJ2; 130 / 1 .	Dúbrava-vein Jozef	22.014	8.669	0.757	1.776	0.122	0.756	0.786	0.153	0	38.868	0	0	0.086	0	0	0	73.987		0.294727	0.115691	0.00930211	0.0250362	0.00169807	0.00950401	0.0195016	0.00272837	0	0.338218	0	0	0.00107416	0	0	0		0.47546		1.85963	0.729971	0.0586933	0.15797	0.0107143	0.0599673	0.123049	0.0172152	0	2.13405	0
Stevko M24 DJ2; 131 / 1 .	Dúbrava-vein Jozef	21.453	9.241	0.708	1.831	0	0.913	0.781	0.095	0	39.208	0	0	0.048	0	0	0	74.278		0.287216	0.123324	0.00869999	0.0258115	0	0.0114777	0.0193775	0.00169409	0	0.341176	0	0	0.000599534	0	0	0		0.475907		1.81054	0.777404	0.0548425	0.162709	0	0.0723527	0.122151	0.0106791	0	2.15069	0
Stevko M24 DJ2; 132 / 1 .	Dúbrava-vein Jozef	20.991	8.547	0.715	1.666	0	1.066	0.678	0.118	0	39.943	0	0	0.07	0	0	0	73.794		0.281031	0.114063	0.00878601	0.0234855	0	0.0134012	0.016822	0.00210423	0	0.347572	0	0	0.00087432	0	0	0		0.457588		1.84247	0.747807	0.0576021	0.153974	0	0.0878595	0.110287	0.0137956	0	2.27872	0
Stevko M24 DJ2; 133 / 1 .	Dúbrava-vein Jozef	21.096	8.42	0.556	1.634	0	1.239	0.762	0.134	0	40.485	0	0	0.043	0	0	0	74.369		0.282437	0.112368	0.0068322	0.0230344	0	0.015576	0.0189061	0.00238955	0	0.352289	0	0	0.000537082	0	0	0		0.459153		1.84538	0.734184	0.04464	0.150501	0	0.10177	0.123528	0.0156128	0	2.30177	0
Stevko M24 DJ2; 134 / 1 .	Dúbrava-vein Jozef	19.761	8.702	0.702	2.081	0.119	1.268	0.702	0.112	0	40.215	0	0	0.069	0	0	0	73.731		0.264564	0.116131	0.00862626	0.0293357	0.00165631	0.0159406	0.0174175	0.00199724	0	0.349939	0	0	0.00086183	0	0	0		0.453671		1.74949	0.767942	0.0570431	0.193989	0.0109527	0.105411	0.115177	0.0132072	0	2.31405	0
Stevko M24 DJ4; 140 / 1 .	Dúbrava-vein Jozef	18.638	9.395	1.111	1.94	0	0.36	1.367	0.199	0	38.146	0	0	0.084	0	0	0	71.24		0.249529	0.125379	0.0136521	0.0273481	0	0.00452572	0.0339169	0.00354867	0	0.331935	0	0	0.00104918	0	0	0		0.454351		1.6476	0.827858	0.0901425	0.180574	0	0.0298825	0.223947	0.0234312	0	2.19171	0
Stevko M24 DJ4; 141 / 1 .	Dúbrava-vein Jozef	20.465	9.325	0.757	1.506	0.223	0.248	1.245	0.218	0	38.78	0	0	0.062	0.157	0	0	72.986		0.273989	0.124445	0.00930211	0.02123	0.00310384	0.00311772	0.0308899	0.00388748	0	0.337452	0	0	0.000774398	0.00206352	0	0		0.466078		1.76358	0.801016	0.0598748	0.136651	0.0199785	0.0200678	0.198829	0.0250226	0	2.17208	0
Stevko M24 DJ4; 142 / 1 .	Dúbrava-vein Jozef	20.54	9.028	0.969	1.483	0	0.397	1.365	0.313	0	38.088	0	0	0.053	0	0	0	72.236		0.274993	0.120482	0.0119072	0.0209058	0	0.00499086	0.0338673	0.00558157	0	0.331431	0	0	0.000661985	0	0	0		0.467146		1.766	0.77373	0.0764677	0.134256	0	0.0320512	0.217495	0.0358447	0	2.12844	0
Stevko M24 DJ4; 143 / 1 .	Dúbrava-vein Jozef	19.861	9.504	0.989	1.807	0	0.389	1.429	0.191	0	38.838	0	0	0.088	0	0	0	73.096		0.265902	0.126834	0.012153	0.0254732	0	0.00489029	0.0354552	0.00340601	0	0.337957	0	0	0.00109915	0	0	0		0.470708		1.6947	0.808361	0.0774554	0.16235	0	0.0311677	0.225969	0.0217078	0	2.15393	0
Stevko M24 DJ4; 144 / 1 .	Dúbrava-vein Jozef	21.604	8.69	0.964	1.565	0	0.182	1.19	0.178	0	39.547	0.09	0	0.089	0	0	0	74.099		0.289238	0.115971	0.0118457	0.0220617	0	0.002288	0.0295253	0.00317418	0	0.344126	0.0012681	0	0.00111164	0	0	0		0.47093		1.84256	0.738778	0.0754619	0.140541	0	0.0145754	0.188087	0.0202208	0	2.19221	0.00807828
Stevko M24 DJ4; 145 / 1 .	Dúbrava-vein Jozef	19.403	9.501	1.353	1.896	0.153	0.28	1.239	0.163	0	38.959	0	0	0.074	0	0	0	73.021		0.259771	0.126794	0.0166258	0.0267278	0.00212954	0.00352	0.0307411	0.0029067	0	0.33901	0	0	0.000924281	0	0	0		0.466309		1.67124	0.815729	0.106962	0.171953	0.0137004	0.0226459	0.197773	0.0187002	0	2.18102	0
Stevko M24 DJ3; 149 / 1 .	Dúbrava-vein Jozef	25.481	0.743	0	0.277	0	0.227	4.72	0.838	0	41.703	0	0	0	0	0	0	73.989		0.341144	0.00991558	0	0.00390485	0	0.00285372	0.117109	0.0149436	0	0.362887	0	0	0	0	0	0		0.474927		2.15493	0.0626343	0	0.024666	0	0.0180262	0.739748	0.0943953	0	2.29227	0
Stevko M24 DJ3; 150 / 1 .	Dúbrava-vein Jozef	23.081	0.959	0.143	0.359	0	0.457	4.769	0.775	0	39.78	0	0	0	0.094	0	0	70.417		0.309012	0.0127982	0.0017572	0.0050608	0	0.00574515	0.118325	0.0138202	0	0.346154	0	0	0	0.00123548	0	0		0.452698		2.0478	0.0848126	0.0116449	0.0335376	0	0.0380727	0.784129	0.0915854	0	2.29394	0
Stevko M24 DJ3; 151 / 1 .	Dúbrava-vein Jozef	23.627	1.319	0	0.157	0	0.289	5.035	0.938	0	39.047	0	0	0	0.061	0	0	70.473		0.316322	0.0176025	0	0.00221322	0	0.00363315	0.124924	0.0167269	0	0.339775	0	0	0	0.000801749	0	0		0.464695		2.04213	0.113639	0	0.0142882	0	0.023455	0.806492	0.107986	0	2.19354	0
Stevko M24 DJ3; 152 / 1 .	Dúbrava-vein Jozef	27.749	0.815	0	0.386	0	0.204	4.045	0.336	0	38.762	0	0	0	0.055	0	0	72.352		0.371508	0.0108764	0	0.00544142	0	0.00256457	0.100361	0.00599172	0	0.337296	0	0	0	0.000722888	0	0		0.490752		2.27106	0.0664884	0	0.0332637	0	0.0156774	0.613515	0.0366278	0	2.06191	0
M24 DJ3; 29 / 1 .	Dúbrava-vein Jozef	29.502	0.752	0	0.302	0	0.364	3.713	0.871		38.021	0		0	0.111	0		73.636		0.394978	0.0100357	0	0.00425727	0	0.004576	0.0921239	0.0155321	0	0.330848	0	0	0	0.00145892	0	0		0.505971		2.3419	0.0595036	0	0.0252422	0	0.027132	0.546221	0.0920929	0	1.96166	0
M24 DJ3; 30 / 1 .	Dúbrava-vein Jozef	30.928	1.025	0	0.195	0	0	3.921	1.596		37.206	0		0.091	0.154	0		75.116		0.414069	0.013679	0	0.0027489	0	0	0.0972847	0.0284607	0	0.323756	0	0	0.00113662	0.00202409	0	0		0.527782		2.35364	0.0777535	0	0.0156252	0	0	0.552982	0.161775	0	1.84028	0
M24 DJ3; 31 / 1 .	Dúbrava-vein Jozef	29.764	1.078	0	0.405	0	0.396	4.02	0.471		35.543	0		0	0.374	0.13		72.181		0.398486	0.0143863	0	0.00570926	0	0.00497829	0.099741	0.00839911	0	0.309285	0	0	0	0.00491564	0.00254999	0		0.5233		2.28446	0.0824742	0	0.0327303	0	0.0285398	0.5718	0.0481508	0	1.77308	0
M24 DJ3; 32 / 1 .	Dúbrava-vein Jozef	28.355	0.907	0	0.415	0	0	3.54	0.773		38.34	0		0.234	0.177	0		72.741		0.379622	0.0121042	0	0.00585023	0	0	0.0878316	0.0137845	0	0.333623	0	0	0.00292273	0.00232639	0	0		0.485408		2.3462	0.0748085	0	0.0361566	0	0	0.542832	0.0851935	0	2.06192	0
M24 DJ3; 33 / 1 .	Dúbrava-vein Jozef	28.961	1.084	0	0.302	0	0	3.837	0.865		37.562	0		0.134	0.177	0.085		73.007		0.387735	0.0144663	0	0.00425727	0	0	0.0952005	0.0154251	0	0.326853	0	0	0.0016737	0.00232639	0.0016673	0		0.501659		2.31872	0.086511	0	0.0254592	0	0	0.569314	0.0922446	0	1.95464	0
M24 DJ1; 34 / 1 .	Dúbrava-vein Jozef	29.898	0.664	0	0.29	0	0	4.142	0.496		39.125	0		0	0.217	0		74.832		0.40028	0.0088613	0	0.00408811	0	0	0.102768	0.00884492	0	0.340454	0	0	0	0.00285212	0	0		0.515997		2.32722	0.0515195	0	0.0237682	0	0	0.597492	0.0514243	0	1.9794	0
M24 DJ1; 35 / 1 .	Dúbrava-vein Jozef	29.924	0.45	0	0.144	0	0.343	3.984	0.488		36.93	0		0	0.151	0		72.414		0.400628	0.0060054	0	0.00202996	0	0.004312	0.0988478	0.00870226	0	0.321354	0	0	0	0.00198466	0	0		0.511823		2.34824	0.0352001	0	0.0118984	0	0.0252744	0.579387	0.0510074	0	1.88359	0
M24 DJ1; 36 / 1 .	Dúbrava-vein Jozef	30.476	0.414	0	0.212	0	0	3.827	0.764		38.747	0		0.082	0.115	0		74.637		0.408018	0.00552497	0	0.00298855	0	0	0.0949524	0.013624	0	0.337165	0	0	0.0010242	0.00151149	0	0		0.511484		2.39314	0.0324055	0	0.0175287	0	0	0.556923	0.0799088	0	1.97757	0
M24 DJ1; 37 / 1 .	Dúbrava-vein Jozef	28.057	0.647	0	0.26	0.155667	0.668	4.349	0.408		37.637	0		0	0.23	0		72.4117		0.375632	0.00863443	0	0.0036652	0.00216667	0.00839772	0.107904	0.00727566	0	0.327506	0	0	0	0.00302299	0	0		0.5064		2.22531	0.0511518	0	0.0217133	0.0128357	0.0497495	0.639241	0.0431023	0	1.9402	0
M24 DJ1; 38 / 1 .	Dúbrava-vein Jozef	29.748	0.442	0	0.17	0	0.474	3.756	0.462		38.986	0		0	0.151	0		74.189		0.398271	0.00589863	0	0.00239648	0	0.00595886	0.0931908	0.00823861	0	0.339245	0	0	0	0.00198466	0	0		0.505716		2.36262	0.0349918	0	0.0142164	0	0.035349	0.552825	0.048873	0	2.01246	0
M24 DJ2; 39 / 1 .	Dúbrava-vein Jozef	24.756	8.151	0.634	1.596	0	0.369	0.73	0.068		37.477	0		0	0.116	0		73.897		0.331438	0.108778	0.00779067	0.0224987	0	0.00463886	0.0181122	0.00121261	0	0.326114	0	0	0	0.00152464	0	0		0.493256		2.01582	0.66159	0.0473831	0.136838	0	0.0282137	0.110159	0.00737514	0	1.98344	0
M24 DJ2; 40 / 1 .	Dúbrava-vein Jozef	23.467	8.656	0.631	1.488	0	0.819	0.783	0.182		36.247	0		0	0.127	0		72.4		0.31418	0.115517	0.00775381	0.0209762	0	0.010296	0.0194272	0.00324551	0	0.315411	0	0	0	0.00166921	0	0		0.488151		1.93084	0.709927	0.0476521	0.128913	0	0.0632756	0.119392	0.0199458	0	1.9384	0
M24 DJ2; 41 / 1 .	Dúbrava-vein Jozef	25.624	8.233	0.46	1.417	0	0.729	0.868	0.194		37.562	0		0.226	0.116	0		75.429		0.343059	0.109872	0.00565254	0.0199754	0	0.00916458	0.0215361	0.0034595	0	0.326853	0	0	0.00282281	0.00152464	0	0		0.509259		2.02093	0.647247	0.0332986	0.117673	0	0.0539877	0.126867	0.0203796	0	1.92546	0
M24 DJ2; 42 / 1 .	Dúbrava-vein Jozef	24.714	8.068	0.582	1.564	0	0.38	0.62	0.086		37.276	0		0	0.125	0		73.415		0.330875	0.10767	0.00715169	0.0220476	0	0.00477715	0.0153829	0.00153359	0	0.324365	0	0	0	0.00164293	0	0		0.487905		2.03447	0.662036	0.0439739	0.135565	0	0.0293734	0.0945857	0.00942968	0	1.99444	0
M24 DJ2; 43 / 1 .	Dúbrava-vein Jozef	25.296	7.021	0.636	1.37	0	0.379	0.542	0.11		39.91	0		0	0.137	0		75.401		0.338667	0.0936975	0.00781525	0.0193128	0	0.00476457	0.0134477	0.00196157	0	0.347285	0	0	0	0.00180065	0	0		0.477705		2.12684	0.588423	0.0490799	0.121285	0	0.0299217	0.0844517	0.0123187	0	2.18096	0
M24 DJ4; 44 / 1 .	Dúbrava-vein Jozef	23.315	9.01	0.863	1.461	0	0.347	1.476	0.299		36.715	0		0	0.107	0		73.593		0.312145	0.120241	0.0106046	0.0205956	0	0.00436229	0.0366213	0.00533192	0	0.319483	0	0	0	0.00140635	0	0		0.50457		1.85591	0.714913	0.0630515	0.122454	0	0.0259366	0.217738	0.0317017	0	1.89954	0
M24 DJ4; 45 / 1 .	Dúbrava-vein Jozef	23.855	8.92	0.808	1.396	0	0	1.344	0.268		36.771	0		0.246	0.136	0		73.744		0.319375	0.11904	0.0099288	0.0196793	0	0	0.0333462	0.00477911	0	0.31997	0	0	0.00307261	0.00178751	0	0		0.50137		1.91101	0.712291	0.0594101	0.117753	0	0	0.199531	0.0285963	0	1.91458	0
M24 DJ4; 46 / 1 .	Dúbrava-vein Jozef	23.175	8.898	0.985	1.568	0.123274	0	1.048	0.271		39.331	0		0	0.072	0		75.4713		0.310271	0.118747	0.0121038	0.022104	0.0017158	0	0.0260021	0.00483261	0	0.342247	0	0	0	0.000946326	0	0		0.490943		1.89597	0.725624	0.0739625	0.135071	0.0104847	0	0.158891	0.0295305	0	2.09136	0
M24 DJ4; 47 / 1 .	Dúbrava-vein Jozef	23.782	7.581	0.802	1.304	0.102578	0	1.221	0.328		37.773	0		0.354	0.125	0		73.3726		0.318397	0.101171	0.00985507	0.0183824	0.00142775	0	0.0302945	0.00584906	0	0.32869	0	0	0.00442156	0.00164293	0	0		0.479528		1.99194	0.632941	0.0616548	0.115003	0.00893219	0	0.189527	0.0365926	0	2.05633	0
M24 DJ4; 48 / 1 .	Dúbrava-vein Jozef	23.402	8.86	0.839	1.558	0	0	1.38	0.202		37.179	0		0.476	0.12	0		74.016		0.31331	0.11824	0.0103097	0.021963	0	0	0.0342394	0.00360216	0	0.323521	0	0	0.00594538	0.00157721	0	0		0.498062		1.88718	0.712198	0.0620991	0.132291	0	0	0.206236	0.0216971	0	1.94868	0
M-symp; 1 / 1 .	Chyžné-Herichová	0	0	0.3098	21.708	20.7832	0	0.3376	0		44.621	0		0	0	0		87.7596		0	0	0.00380686	0.306016	0.289273	0	0.00837626	0	0	0.388279	0	0	0	0	0	0		0.607472		0	0	0.0188002	1.51126	1.42857	0	0.0413661	0	0	1.91751	0
M-symp; 2 / 1 .	Chyžné-Herichová	0	0	0.2425	19.9483	19.1246	0	0.3678	0		42.7512	0		0	0	0		82.4344		0	0	0.00297987	0.28121	0.266187	0	0.00912555	0	0	0.372008	0	0	0	0	0	0		0.559503		0	0	0.0159778	1.50782	1.42727	0	0.0489304	0	0	1.99467	0
M-symp; 3 / 1 .	Chyžné-Herichová	0	0	0.1705	20.186	18.5247	0	0.209	0		41.3756	0		0	0	0		80.4658		0	0	0.00209512	0.284561	0.257838	0	0.00518554	0	0	0.360038	0	0	0	0	0	0		0.549679		0	0	0.0114346	1.55306	1.40721	0	0.0283013	0	0	1.96499	0
M-symp; 4 / 1 .	Chyžné-Herichová	0	0	0.2532	18.3501	17.8734	0	0.0891	0		39.9185	0		0	0	0		76.4843		0	0	0.00311135	0.25868	0.248772	0	0.00221068	0	0	0.347359	0	0	0	0	0	0		0.512775		0	0	0.018203	1.51341	1.45545	0	0.0129336	0	0	2.03223	0
M-symp; 5 / 1 .	Chyžné-Herichová	0	0	0.1485	18.1768	18.6774	0	0.0133	0		40.353	0		0	0	0		77.369		0	0	0.00182479	0.256237	0.259963	0	0.000329989	0	0	0.35114	0	0	0	0	0	0		0.518355		0	0	0.010561	1.48298	1.50455	0	0.00190982	0	0	2.03224	0
M-symp; 6 / 1 .	Chyžné-Herichová	0	0	0.2973	18.3957	19.87	0	0.105	0		40.7759	0		0	0	0		79.4439		0	0	0.00365326	0.259323	0.276562	0	0.00260517	0	0	0.35482	0	0	0	0	0	0		0.542144		0	0	0.0202156	1.43499	1.53038	0	0.014416	0	0	1.96343	0
M-symp; 7 / 1 .	Chyžné-Herichová	0	0	0.2715	18.7877	17.4723	0	0.0983	0		40.028	0		0	0	0		76.6578		0	0	0.00333623	0.264849	0.24319	0	0.00243894	0	0	0.348312	0	0	0	0	0	0		0.513814		0	0	0.0194792	1.54637	1.41991	0	0.0142402	0	0	2.03369	0
M-symp; 8 / 1 .	Chyžné-Herichová	0	0	0.1993	18.5644	19.7914	0	0.0569	0		41.3742	0		0	0	0		79.9862		0	0	0.00244902	0.261701	0.275468	0	0.00141176	0	0	0.360026	0	0	0	0	0	0		0.54103		0	0	0.0135798	1.45113	1.52747	0	0.00782816	0	0	1.99634	0
M-symp; 9 / 1 .	Chyžné-Herichová	0	0	0.1489	18.2946	18.3038	0	0.0895	0		39.7832	0		0	0	0		76.62		0	0	0.0018297	0.257898	0.254763	0	0.0022206	0	0	0.346182	0	0	0	0	0	0		0.516711		0	0	0.0106232	1.49734	1.47914	0	0.0128927	0	0	2.00991	0
M-symp; 10 / 1 .	Chyžné-Herichová	0	0	0.2067	18.8504	16.9133	0	0.2202	0		39.5435	0		0	0	0		75.7341		0	0	0.00253995	0.265733	0.235409	0	0.00546342	0	0	0.344096	0	0	0	0	0	0		0.509145		0	0	0.014966	1.56576	1.38708	0	0.0321917	0	0	2.02749	0
M-symp; 11 / 1 .	Chyžné-Herichová	0	0	0.1469	19.0363	17.9234	0	0.1822	0		39.8725	0		0	0	0		77.1613		0	0	0.00180513	0.268354	0.249468	0	0.0045206	0	0	0.346959	0	0	0	0	0	0		0.524148		0	0	0.0103318	1.53594	1.42785	0	0.025874	0	0	1.98585	0
M-symp; 12 / 1 .	Chyžné-Herichová	0	0	0.2482	19.249	18.2349	0	0.0983	0		41.5214	0		0	0	0		79.3518		0	0	0.00304991	0.271352	0.253804	0	0.00243894	0	0	0.361307	0	0	0	0	0	0		0.530645		0	0	0.0172427	1.53409	1.43488	0	0.0137885	0	0	2.04265	0
M-symp; 13 / 1 .	Chyžné-Herichová	0	0	0.1979	18.1428	17.9139	0	0.0775	0		39.5917	0		0	0	0		75.9238		0	0	0.00243182	0.255758	0.249336	0	0.00192287	0	0	0.344515	0	0	0	0	0	0		0.509449		0	0	0.0143203	1.50609	1.46827	0	0.0113232	0	0	2.02875	0
M-symp; 14 / 1 .	Chyžné-Herichová	0	0	0.3193	19.578	20.725	0	0.1231	0		43.0417	0		0	0	0		83.7871		0	0	0.0039236	0.27599	0.288463	0	0.00305426	0	0	0.374536	0	0	0	0	0	0		0.57143		0	0	0.0205988	1.44894	1.51442	0	0.0160348	0	0	1.96631	0
M-symp; 15 / 1 .	Chyžné-Herichová	0	0	0.3248	19.3695	18.0279	0	0.132	0		39.7701	0		0	0	0		77.6243		0	0	0.00399118	0.273051	0.250923	0	0.00327508	0	0	0.346068	0	0	0	0	0	0		0.53124		0	0	0.0225389	1.54196	1.417	0	0.0184949	0	0	1.9543	0
M-symp; 16 / 1 .	Chyžné-Herichová	0	0	0.1632	19.7618	17.2972	0	0.0449	0		39.4649	0		0	0	0		76.732		0	0	0.00200542	0.278581	0.240752	0	0.00111402	0	0	0.343412	0	0	0	0	0	0		0.522453		0	0	0.0115154	1.59965	1.38244	0	0.00639688	0	0	1.97192	0
M-symp; 17 / 1 .	Chyžné-Herichová	0	0	0.0979	19.5577	15.601	0	0.202	0		38.5929	0		0	0	0		74.0515		0	0	0.00120301	0.275704	0.217144	0	0.00501186	0	0	0.335824	0	0	0	0	0	0		0.499062		0	0	0.0072316	1.65733	1.30531	0	0.0301277	0	0	2.01873	0
M-symp; 18 / 1 .	Chyžné-Herichová	0	0	0.1978	20.3875	17.6816	0	0.1346	0		40.6166	0		0	0	0		79.0181		0	0	0.00243059	0.287401	0.246103	0	0.00333959	0	0	0.353434	0	0	0	0	0	0		0.539274		0	0	0.0135215	1.59882	1.36908	0	0.0185782	0	0	1.96616	0
M-symp; 19 / 1 .	Chyžné-Herichová	0	0	0.1814	19.0724	19.1514	0	0.0269	0		41.0305	0		0	0	0		79.4626		0	0	0.00222907	0.268862	0.26656	0	0.000667421	0	0	0.357035	0	0	0	0	0	0		0.538319		0	0	0.0124224	1.49834	1.48551	0	0.00371947	0	0	1.98972	0
M-symp; 20 / 1 .	Chyžné-Herichová	0	0	0.2612	20.134	18.366	0	0.0871	0		40.4048	0		0	0	0		79.2531		0	0	0.00320966	0.283828	0.255629	0	0.00216105	0	0	0.351591	0	0	0	0	0	0		0.544827		0	0	0.0176734	1.56285	1.40758	0	0.0118995	0	0	1.93598	0
Stevko M17 LSV8; 124 / 1 .	Ľubietová-Svätodušná	11.461	9.992	0	0	0	13.022	0.446	0	0	38.856	0	0	0.128	0.087	0	0	73.992		0.153442	0.133347	0	0	0	0.163705	0.0110658	0	0	0.338113	0	0	0.00159876	0.00114348	0	0		0.461559		0.997327	0.866713	0	0	0	1.06404	0.0719244	0	0	2.19764	0
Stevko M17 LSV8; 125 / 1 .	Ľubietová-Svätodušná	8.792	10.286	0	0.189	0.096	15.822	0.408	0	0	37.993	0	0	0.087	0	0	0	73.673		0.117709	0.13727	0	0.00266432	0.00133618	0.198905	0.010123	0	0	0.330604	0	0	0.00108666	0	0	0		0.468008		0.754531	0.879922	0	0.0170787	0.00856514	1.27501	0.0648897	0	0	2.11922	0
Stevko M17 LSV8; 126 / 1 .	Ľubietová-Svätodušná	8.66	10.675	0	0.119	0	16.628	0.767	0	0	38.005	0	0	0.061	0	0	0	74.915		0.115942	0.142461	0	0.00167754	0	0.209038	0.0190302	0	0	0.330708	0	0	0.000761908	0	0	0		0.488149		0.712539	0.875521	0	0.0103096	0	1.28468	0.116953	0	0	2.03242	0
Stevko M17 LSV8; 127 / 1 .	Ľubietová-Svätodušná	12.207	8.725	0	0	0	5.585	7.321	0	0	40.279	0.245	0	0	0	0	0	74.362		0.163429	0.116438	0	0	0	0.0702115	0.181643	0	0	0.350496	0.00345205	0	0	0	0	0		0.531722		0.922077	0.656949	0	0	0	0.396137	1.02484	0	0	1.97752	0.0194766
Stevko M17 LSV8; 128 / 1 .	Ľubietová-Svätodušná	12.697	9.366	0	0	0	4.563	5.802	0	0	40.243	0.275	0	0.04	0	0	0	72.986		0.16999	0.124992	0	0	0	0.0573635	0.143955	0	0	0.350183	0.00387475	0	0.000499612	0	0	0		0.4963		1.02754	0.755545	0	0	0	0.346747	0.870166	0	0	2.11676	0.0234218
Stevko M17 LSV8; 129 / 1 .	Ľubietová-Svätodušná	16.103	8.353	0	0	0	4.846	3.764	0	0	40.535	0.089	0	0	0	0	0	73.69		0.21559	0.111474	0	0	0	0.0609212	0.0933893	0	0	0.352724	0.00125401	0	0	0	0	0		0.481374		1.34359	0.694721	0	0	0	0.379671	0.582017	0	0	2.19823	0.0078152
Stevko M17 LSV8; 130 / 1 .	Ľubietová-Svätodušná	11.658	8.091	0	0	0.097	6.22	7.011	0	0	39.492	0.125	0	0.07	0	0	0	72.764		0.156079	0.107977	0	0	0.0013501	0.0781943	0.173951	0	0	0.343648	0.00176125	0	0.00087432	0	0	0		0.517552		0.904717	0.625891	0	0	0.00782589	0.453255	1.00831	0	0	1.99196	0.0102091
Stevko M16 LSV6; 154 / 1 .	Ľubietová-Svätodušná	15.781	10.836	0	0	0	2.614	4.141	0	0	39.357	0.084	0	0.089	0	0	0	72.902		0.211279	0.14461	0	0	0	0.0328617	0.102743	0	0	0.342473	0.00118356	0	0.00111164	0	0	0		0.491494		1.28961	0.882677	0	0	0	0.200583	0.627128	0	0	2.0904	0.00722427
Stevko M16 LSV6; 155 / 1 .	Ľubietová-Svätodušná	15.133	10.978	0	0	0	3.058	4.615	0	0	39.893	0.091	0	0	0	0	0	73.768		0.202603	0.146505	0	0	0	0.0384435	0.114504	0	0	0.347137	0.00128219	0	0	0	0	0		0.502055		1.21064	0.875431	0	0	0	0.229716	0.684209	0	0	2.0743	0.00766165
Stevko M16 LSV6; 156 / 1 .	Ľubietová-Svätodušná	10.845	9.208	0	0	0	4.744	8.268	0.055	0	41.013	0.125	0	0	0	0	0	74.258		0.145195	0.122884	0	0	0	0.0596389	0.205139	0.000980787	0	0.356883	0.00176125	0	0	0	0	0		0.532856		0.817451	0.69184	0	0	0	0.335769	1.15494	0.00552187	0	2.00926	0.0099159
Stevko M16 LSV6; 157 / 1 .	Ľubietová-Svätodušná	9.059	7.205	0	0.1	0	3.474	10.81	0	0	42.683	0.139	0	0.06	0	0	0	73.53		0.121283	0.0961531	0	0.00140969	0	0.0436732	0.268209	0	0	0.371415	0.00195851	0	0.000749417	0	0	0		0.530728		0.685568	0.543516	0	0.00796845	0	0.246867	1.51608	0	0	2.09946	0.0110707
Stevko M16 LSV6; 158 / 1 .	Ľubietová-Svätodušná	11.077	8.98	0	0	0	5.135	8.181	0.037	0	40.529	0.066	0	0.045	0	0	0	74.05		0.148301	0.119841	0	0	0	0.0645543	0.20298	0.000659802	0	0.352671	0.00092994	0	0.000562063	0	0	0		0.535676		0.830543	0.671157	0	0	0	0.36153	1.13677	0.00369515	0	1.9751	0.00520803
Stevko N1 E3; 110 / 1 .	Ľubietová-Svätodušná	21.432	7.447	0	0	0.073	9.9	1.252	0	0	41.494	0.07	0	0.13	0	0	0	81.798		0.286935	0.0993827	0	0	0.00101606	0.124457	0.0310636	0	0	0.361069	0.0009863	0	0.00162374	0	0	0		0.542855		1.5857	0.549222	0	0	0.00561507	0.687793	0.171668	0	0	1.99539	0.00545063
Stevko N1 E3; 111 / 1 .	Ľubietová-Svätodušná	20.762	6.452	0	0	0	11.565	1.243	0	0	42.156	0.06	0	0	0	0	0	82.238		0.277965	0.0861041	0	0	0	0.145389	0.0308403	0	0	0.366829	0.0008454	0	0	0	0	0		0.540298		1.5434	0.478092	0	0	0	0.807269	0.17124	0	0	2.03681	0.00469408
Stevko N1 E3; 112 / 1 .	Ľubietová-Svätodušná	21.235	7.523	0	0	0	9.689	1.092	0	0	42.165	0.094	0	0	0	0	0	81.798		0.284298	0.100397	0	0	0	0.121805	0.0270938	0	0	0.366907	0.00132446	0	0	0	0	0		0.533593		1.5984	0.564458	0	0	0	0.684818	0.152328	0	0	2.06285	0.00744646
Stevko N1 E3; 113 / 1 .	Ľubietová-Svätodušná	19.683	6.642	0	0	0	12.093	1.296	0	0	42.344	0	0	0	0	0	0	82.058		0.263519	0.0886397	0	0	0	0.152026	0.0321553	0	0	0.368465	0	0	0	0	0	0		0.536341		1.47398	0.495802	0	0	0	0.850353	0.179859	0	0	2.06099	0
M36 LS1; 137 / 1 .	Ľubietová-Svätodušná	30.84	1.32	0	0.093	0	2.413	1.401	0	0	39.186	0.094	0	0	0	0	0	75.347		0.412891	0.0176158	0	0.00131102	0	0.0303349	0.0347605	0	0	0.340985	0.00132446	0	0	0	0	0		0.496913		2.49274	0.106352	0	0.00791495	0	0.18314	0.209858	0	0	2.05862	0.00799612
M36 LS1; 138 / 1 .	Ľubietová-Svätodušná	31.246	0.736	0	0	0.182	1.992	1.601	0	0	39.964	0.239	0	0	0	0	0	75.96		0.418327	0.00982216	0	0	0.00253318	0.0250423	0.0397227	0	0	0.347755	0.00336751	0	0	0	0	0		0.495447		2.53303	0.0594745	0	0	0.0153388	0.151635	0.240526	0	0	2.1057	0.0203907
M36 LS1; 139 / 1 .	Ľubietová-Svätodušná	31.64	0.952	0.163	0	0	2.297	1.812	0	0	38.18	0.046	0	0	0	0	0	75.09		0.423602	0.0127048	0.00200296	0	0	0.0288766	0.0449579	0	0	0.332231	0.00064814	0	0	0	0	0		0.512144		2.48134	0.074421	0.0117328	0	0	0.169151	0.263351	0	0	1.94612	0.00379663
M36 LS1; 140 / 1 .	Ľubietová-Svätodušná	30.601	2.047	0.169	0	0	1.73	1.569	0	0	39.578	0.21	0	0.04	0	0	0	75.944		0.409691	0.0273179	0.00207669	0	0	0.0217486	0.0389288	0	0	0.344396	0.0029589	0	0.000499612	0	0	0		0.499763		2.45931	0.163985	0.0124661	0	0	0.130553	0.233683	0	0	2.06736	0.0177618
M36 LS1; 141 / 1 .	Ľubietová-Svätodušná	30.252	1.413	0	0	0	1.862	2.175	0	0	40.002	0.087	0	0	0	0	0	75.791		0.405019	0.0188569	0	0	0	0.023408	0.0539643	0	0	0.348086	0.00122583	0	0	0	0	0		0.501248		2.42406	0.11286	0	0	0	0.140098	0.32298	0	0	2.08331	0.00733667
M36 LS1; 142 / 1 .	Ľubietová-Svätodušná	31.572	1.339	0	0	0	2.792	1.092	0	0	39.974	0.135	0	0	0	0	0	76.904		0.422691	0.0178694	0	0	0	0.0350995	0.0270938	0	0	0.347842	0.00190215	0	0	0	0	0		0.502754		2.52226	0.106629	0	0	0	0.209443	0.161672	0	0	2.07562	0.0113504
M36 E1; 143 / 1 .	Ľubietová-Svätodušná	16.442	13.607	0	0.896	1.536	6.023	2.141	0	0	39.651	0.109	0	0	0.207	0.084	0	80.696		0.220128	0.18159	0	0.0126309	0.0213789	0.0757178	0.0531208	0	0	0.345031	0.00153581	0	0	0.00272069	0.00164769	0		0.564566		1.16972	0.964934	0	0.067118	0.113604	0.40235	0.282274	0	0	1.83343	0.00816101
M36 E1; 144 / 1 .	Ľubietová-Svätodušná	15.982	13.414	0.16	1.188	0.842	6.665	1.795	0	0	39.839	0	0	0.1	0.529	0.342	0	80.856		0.21397	0.179014	0.0019661	0.0167472	0.0117194	0.0837886	0.0445361	0	0	0.346667	0	0	0.00124903	0.00695287	0.00670843	0		0.551741		1.16342	0.973359	0.0106903	0.0910598	0.0637225	0.455586	0.242157	0	0	1.88494	0
M36 E1; 145 / 1 .	Ľubietová-Svätodušná	17.382	13.365	0.216	0.774	0.265	6.954	1.637	0	0	39.559	0	0	0.05	0.175	0	0	80.377		0.232713	0.17836	0.00265423	0.010911	0.00368842	0.0874218	0.0406159	0	0	0.344231	0	0	0.000624514	0.0023001	0	0		0.556365		1.25482	0.961745	0.014312	0.0588338	0.0198885	0.471391	0.219007	0	0	1.85614	0
M36 E1; 146 / 1 .	Ľubietová-Svätodušná	15.47	15.279	0	0	0	6.332	0.937	0	0	38.785	0	0	0.042	0.09	0	0	76.935		0.207115	0.203903	0	0	0	0.0796023	0.0232481	0	0	0.337496	0	0	0.000524592	0.00118291	0	0		0.513869		1.20915	1.1904	0	0	0	0.464724	0.135724	0	0	1.97032	0
M36 E1; 147 / 1 .	Ľubietová-Svätodušná	15.833	14.923	0	0	0	6.229	1.667	0	0	39.205	0	0	0.115	0	0	0	77.972		0.211975	0.199152	0	0	0	0.0783075	0.0413602	0	0	0.34115	0	0	0.00143638	0	0	0		0.530795		1.19806	1.12559	0	0	0	0.442586	0.233764	0	0	1.92815	0
M36 E1; 148 / 1 .	Ľubietová-Svätodušná	15.938	12.636	0	0	0	7.501	2.932	0	0	42.189	0	0	0.054	0	0	0	81.25		0.213381	0.168632	0	0	0	0.0942984	0.0727464	0	0	0.367116	0	0	0.000674476	0	0	0		0.549057		1.16589	0.921388	0	0	0	0.515238	0.39748	0	0	2.00589	0
M36 E2; 149 / 1 .	Ľubietová-Svätodušná	19.012	6.103	0	0	0	4.646	6.05	0	0	41.545	0.093	0	0.057	0.057	0	0	77.563		0.254536	0.0814465	0	0	0	0.0584069	0.150108	0	0	0.361512	0.00131037	0	0.000711946	0.000749175	0	0		0.544497		1.40241	0.448744	0	0	0	0.321803	0.827044	0	0	1.99181	0.00721971
M36 E2; 150 / 1 .	Ľubietová-Svätodušná	18.629	4.548	0	0	0	5.224	8.054	0	0	40.154	0.101	0	0	0	0	0	76.71		0.249408	0.0606945	0	0	0	0.0656732	0.199829	0	0	0.349408	0.00142309	0	0	0	0	0		0.575605		1.29989	0.316334	0	0	0	0.342282	1.04149	0	0	1.82108	0.00741701
M36 E2; 151 / 1 .	Ľubietová-Svätodušná	21.012	7.949	0	0	0.128	5.298	2.137	0	0	40.973	0	0	0.054	0	0	0	77.551		0.281312	0.106082	0	0	0.00178158	0.0666035	0.0530215	0	0	0.356535	0	0	0.000674476	0	0	0		0.508801		1.65868	0.625483	0	0	0.0105046	0.392709	0.312626	0	0	2.10221	0
M36 E2; 152 / 1 .	Ľubietová-Svätodušná	20.745	7.441	0	0	0	4.944	2.427	0	0	40.93	0	0	0.047	0	0	0	76.534		0.277738	0.0993026	0	0	0	0.0621532	0.0602168	0	0	0.356161	0	0	0.000587044	0	0	0		0.49941		1.66839	0.596519	0	0	0	0.37336	0.361727	0	0	2.13949	0
M36 E2; 153 / 1 .	Ľubietová-Svätodušná	21.974	6.561	0	0	0	4.898	2.782	0	0	40.645	0	0	0.086	0	0	0	76.946		0.294192	0.0875587	0	0	0	0.0615749	0.0690247	0	0	0.353681	0	0	0.00107416	0	0	0		0.51235		1.7226	0.512689	0	0	0	0.360544	0.404165	0	0	2.07093	0
M36 E2; 154 / 1 .	Ľubietová-Svätodušná	21.735	7.088	0	0	0.442	4.153	2.914	0	0	38.334	0	0	0.032	0.941	0.738	0	76.377		0.290992	0.0945917	0	0	0.00615201	0.0522092	0.0722998	0	0	0.333571	0	0	0.000399689	0.012368	0.0144761	0		0.516245		1.69101	0.549691	0	0	0.0357506	0.303398	0.420149	0	0	1.93845	0
M36 E2; 155 / 1 .	Ľubietová-Svätodušná	19.96	6.561	0	0	0	5.304	2.078	0	0	41.317	0	0	0	0.121	0	0	75.341		0.267228	0.0875587	0	0	0	0.0666789	0.0515576	0	0	0.359528	0	0	0	0.00159035	0	0		0.473023		1.69481	0.555313	0	0	0	0.42289	0.326988	0	0	2.2802	0
Stevko M43 E4; 88 / 1 .	Ľubietová-Svätodušná	23.106	1.702	0.425	0	0	6.766	1.368	0	0	39.786	0	0	0	0	0	0	73.153		0.309347	0.0227137	0.00522245	0	0	0.0850583	0.0339417	0	0	0.346206	0	0	0	0	0	0		0.456283		2.03391	0.14934	0.0343369	0	0	0.559247	0.223162	0	0	2.27626	0
Stevko M43 E4; 89 / 1 .	Ľubietová-Svätodušná	21.794	1.357	0	0	0	7.492	3.621	0	0	39.925	0	0	0	0	0	0	74.189		0.291782	0.0181096	0	0	0	0.0941852	0.0898413	0	0	0.347416	0	0	0	0	0	0		0.493918		1.77225	0.109996	0	0	0	0.57207	0.545686	0	0	2.11016	0
Stevko M43 E4; 90 / 1 .	Ľubietová-Svätodušná	23.149	0.57	0	0	0	5.444	3.678	0	0	40.578	0.187	0	0	0	0	0	73.606		0.309923	0.00760684	0	0	0	0.0684389	0.0912555	0	0	0.353098	0.00263483	0	0	0	0	0		0.477224		1.94828	0.0478193	0	0	0	0.430231	0.573665	0	0	2.2197	0.0165635
Stevko M43 E4; 91 / 1 .	Ľubietová-Svätodušná	23.777	0.546	0	0	0	5.51	3.547	0	0	41.799	0	0	0	0	0	0	75.179		0.318331	0.00728655	0	0	0	0.0692686	0.0880053	0	0	0.363723	0	0	0	0	0	0		0.482891		1.97765	0.0452683	0	0	0	0.430337	0.54674	0	0	2.25966	0
Stevko M43 E4; 92 / 1 .	Ľubietová-Svätodušná	24.707	1.581	0.243	0.113	0	7.156	2.35	0	0	40.274	0	0	0	0	0	0	76.424		0.330782	0.021099	0.00298601	0.00159295	0	0.0899612	0.0583063	0	0	0.350452	0	0	0	0	0	0		0.504727		1.9661	0.125408	0.0177483	0.00946821	0	0.534712	0.346561	0	0	2.08302	0
M43 E4; 15 / 1 .	Ľubietová-Svätodušná	22.549	1.303	0.195	0	0	7.75	4.624	0		37.76	0		0	0.08	0		74.261		0.30189	0.017389	0.00239618	0	0	0.0974286	0.114727	0	0	0.328576	0	0	0	0.00105147	0	0		0.533831		1.69655	0.0977218	0.013466	0	0	0.547526	0.644738	0	0	1.84652	0
M43 E4; 16 / 1 .	Ľubietová-Svätodušná	26.05	1.551	0.394	0	0	8.386	1.502	0.214		39.756	0		0.105	0.087	0		78.045		0.348762	0.0206986	0.00484152	0	0	0.105424	0.0372664	0.00381615	0	0.345945	0	0	0.00131148	0.00114348	0	0		0.516992		2.02379	0.12011	0.0280943	0	0	0.611754	0.216249	0.0221444	0	2.00745	0
M43 E4; 17 / 1 .	Ľubietová-Svätodušná	25.365	1.351	0.483	0	0	8.368	1.735	0		39.635	0		0	0.063	0		77		0.339591	0.0180295	0.00593516	0	0	0.105198	0.0430474	0	0	0.344892	0	0	0	0.000828035	0	0		0.511801		1.99057	0.105683	0.0347899	0	0	0.616633	0.252329	0	0	2.02164	0
M43 E4; 18 / 1 .	Ľubietová-Svätodušná	21.968	1.553	0.267	0	0	8.797	4.918	0		42.026	0		0	0.073	0		79.602		0.294111	0.0207253	0.00328093	0	0	0.110591	0.122021	0	0	0.365698	0	0	0	0.00095947	0	0		0.55073		1.60212	0.112897	0.0178723	0	0	0.602424	0.664689	0	0	1.99207	0
M43 E4; 19 / 1 .	Ľubietová-Svätodušná	25.886	1.143	0.321	0	0	9.436	2.47	0.099		38.525	0		0.077	0	0		77.957		0.346566	0.0152537	0.00394449	0	0	0.118624	0.0612836	0.00176542	0	0.335233	0	0	0.000961752	0	0	0		0.545672		1.90535	0.0838619	0.021686	0	0	0.652172	0.336926	0.00970592	0	1.84305	0
M43 E4; 20 / 1 .	Ľubietová-Svätodušná	24.565	1.229	0.234	0	0	9.366	2.004	0		39.753	0		0	0.069	0		77.22		0.32888	0.0164014	0.00287542	0	0	0.117744	0.0497216	0	0	0.345919	0	0	0	0.000906896	0	0		0.515623		1.91349	0.0954267	0.0167298	0	0	0.685059	0.289291	0	0	2.01263	0
M43 E4; 21 / 1 .	Ľubietová-Svätodušná	25.153	0.879	0	0	0	4.338	4.825	0		39.537	0.106		0.161	0.104	0		75.103		0.336753	0.0117305	0	0	0	0.0545349	0.119714	0	0	0.344039	0.00149354	0	0.00201094	0.00136692	0	0		0.522732		1.93265	0.0673225	0	0	0	0.31298	0.687048	0	0	1.97447	0.00857154
M43 E4; 22 / 1 .	Ľubietová-Svätodušná	25.528	1.893	0.27	0	0	6.333	1.802	0		37.912	0		0	0.078	0		73.816		0.341773	0.0252627	0.00331779	0	0	0.0796149	0.0447098	0	0	0.329899	0	0	0	0.00102519	0	0		0.494678		2.0727	0.153207	0.0201209	0	0	0.482828	0.271144	0	0	2.00069	0
M43 E4; 23 / 1 .	Ľubietová-Svätodušná	22.935	1.052	0.177	0	0	7.619	4.512	0		39.005	0		0	0	0		75.3		0.307058	0.0140393	0.002175	0	0	0.0957818	0.111948	0	0	0.33941	0	0	0	0	0	0		0.531002		1.73478	0.0793177	0.0122881	0	0	0.541138	0.632473	0	0	1.91756	0
M43 E4; 24 / 1 .	Ľubietová-Svätodušná	24.357	1.372	0.287	0	0	8.294	1.981	0		38.932	0.188		0	0	0.078		75.489		0.326096	0.0183098	0.00352669	0	0	0.104268	0.049151	0	0	0.338775	0.00264892	0	0	0	0.00152999	0		0.501351		1.9513	0.109563	0.0211031	0	0	0.62392	0.294111	0	0	2.02717	0.0158507
M43 E4; 25 / 1 .	Ľubietová-Svätodušná	26.699	0.282	0	0	0	6.07	3.642	0		40.144	0.233		0	0.086	0		77.156		0.357451	0.00376338	0	0	0	0.0763086	0.0903623	0	0	0.349321	0.00328297	0	0	0.00113033	0	0		0.527885		2.03141	0.0213875	0	0	0	0.433666	0.513534	0	0	1.98521	0.0186573
M43 E4; 26 / 1 .	Ľubietová-Svätodušná	22.788	2.052	0.332	0	0	5.518	4.182	0		41.66	0		0.483	0	0.073		77.088		0.30509	0.0273846	0.00407966	0	0	0.0693692	0.10376	0	0	0.362513	0	0	0.00603281	0	0.00143192	0		0.509683		1.79576	0.161186	0.0240129	0	0	0.408307	0.610734	0	0	2.13375	0
M36 E2; 49 / 1 .	Ľubietová-Svätodušná	22.328	6.681	0	0	0	4.075	3.108	0		38.73	0		0	0.1	0		75.022		0.298931	0.0891601	0	0	0	0.0512286	0.0771132	0	0	0.337017	0	0	0	0.00131434	0	0		0.516433		1.73651	0.517938	0	0	0	0.297591	0.447956	0	0	1.95776	0
M36 E2; 50 / 1 .	Ľubietová-Svätodušná	21.871	6.029	0	0	0	4.662	3.247	0		39.488	0		0	0.086	0		75.383		0.292813	0.080459	0	0	0	0.058608	0.0805619	0	0	0.343613	0	0	0	0.00113033	0	0		0.512442		1.71422	0.471033	0	0	0	0.343111	0.471636	0	0	2.01162	0
M36 E2; 51 / 1 .	Ľubietová-Svätodušná	17.93	3.786	0	0	0	5.58	6.347	0		37.666	0.342		0	0.092	0		71.743		0.24005	0.0505254	0	0	0	0.0701486	0.157477	0	0	0.327758	0.00481878	0	0	0.00120919	0	0		0.518201		1.38971	0.292505	0	0	0	0.406109	0.911674	0	0	1.89748	0.0278972
M36 E2; 52 / 1 .	Ľubietová-Svätodušná	16.912	4.102	0	0	0	5.174	7.324	0		38.573	0.179		0	0.079	0		72.343		0.226421	0.0547425	0	0	0	0.0650446	0.181717	0	0	0.335651	0.00252211	0	0	0.00103833	0	0		0.527925		1.28666	0.311081	0	0	0	0.369624	1.03263	0	0	1.90738	0.0143322
M36 E2; 53 / 1 .	Ľubietová-Svätodušná	18.615	5.8	0	0.117	0	7.583	4.044	0		37.274	0		0	0.1	0		73.533		0.249221	0.0774029	0	0.00164934	0	0.0953292	0.100336	0	0	0.324347	0	0	0	0.00131434	0	0		0.523939		1.427	0.443198	0	0.0094439	0	0.545842	0.574512	0	0	1.85717	0
M36 E2; 54 / 1 .	Ľubietová-Svätodušná	16.585	9.736	0	1.134	0	7.991	0.181	0		39.504	0		0.1	0.096	0		75.327		0.222043	0.12993	0	0.0159859	0	0.100458	0.00449082	0	0	0.343752	0	0	0.00124903	0.00126177	0	0		0.472908		1.40858	0.824241	0	0.10141	0	0.63728	0.0284886	0	0	2.18067	0
M36 E2; 55 / 1 .	Ľubietová-Svätodušná	18.243	5.714	0	0	0	5.148	4.359	0		38.312	0		0	0.073	0.079		71.928		0.24424	0.0762552	0	0	0	0.0647178	0.108152	0	0	0.33338	0	0	0	0.00095947	0.00154961	0		0.493365		1.48515	0.463684	0	0	0	0.393528	0.657638	0	0	2.02718	0
M36 E2; 56 / 1 .	Ľubietová-Svätodušná	20.654	7.669	0	0	0	4.822	1.809	0		38.813	0		0	0.046	0		73.813		0.276519	0.102345	0	0	0	0.0606195	0.0448834	0	0	0.337739	0	0	0	0.000604597	0	0		0.484368		1.71266	0.63389	0	0	0	0.375455	0.277992	0	0	2.09184	0
M36 E2; 57 / 1 .	Ľubietová-Svätodušná	16.356	4.865	0	0	0	6.337	6.473	0		38.152	0		0	0	0		72.183		0.218977	0.064925	0	0	0	0.0796652	0.160603	0	0	0.331987	0	0	0	0	0	0		0.52417		1.25328	0.371588	0	0	0	0.455951	0.919184	0	0	1.90008	0
M36 E2; 58 / 1 .	Ľubietová-Svätodušná	21.324	5.915	0	0	0	4.196	2.74	0		38.145	0		0	0.05	0		72.37		0.285489	0.0789376	0	0	0	0.0527498	0.0679827	0	0	0.331927	0	0	0	0.000657171	0	0		0.485159		1.76533	0.488113	0	0	0	0.32618	0.420373	0	0	2.05248	0
M36 E2; 59 / 1 .	Ľubietová-Svätodušná	16.404	4.44	0	0	0	5.532	5.603	0		38.934	0		0	0.052	0		70.965		0.21962	0.0592533	0	0	0	0.0695452	0.139017	0	0	0.338792	0	0	0	0.000683458	0	0		0.487435		1.35168	0.364684	0	0	0	0.428027	0.855604	0	0	2.08515	0
M36 E2; 60 / 1 .	Ľubietová-Svätodušná	16.012	6.354	0	0	0	4.738	6.07	0		39.858	0.227		0	0	0		73.259		0.214371	0.0847962	0	0	0	0.0595635	0.150604	0	0	0.346833	0.00319843	0	0	0	0	0		0.509335		1.26265	0.499452	0	0	0	0.350831	0.887062	0	0	2.04286	0.0188389
M36 E2; 61 / 1 .	Ľubietová-Svätodušná	13.258	10.586	0	1.481	0	10.378	0.489	0		40.368	0		0	0.056	0		76.616		0.1775	0.141274	0	0.0208776	0	0.130466	0.0121327	0	0	0.35127	0	0	0	0.000736032	0	0		0.482251		1.1042	0.87884	0	0.129876	0	0.811609	0.0754753	0	0	2.18519	0
M36 E2; 62 / 1 .	Ľubietová-Svätodušná	15.937	4.317	0	0	0	6.339	6.904	0		38.499	0.135		0	0.056	0		72.187		0.213367	0.0576118	0	0	0	0.0796903	0.171296	0	0	0.335007	0.00190215	0	0	0.000736032	0	0		0.521966		1.22633	0.331124	0	0	0	0.45802	0.984527	0	0	1.92545	0.0109326
M36 E2; 63 / 1 .	Ľubietová-Svätodušná	20.849	5.317	0	0	0	4.445	2.997	0		38.701	0		0	0.06	0		72.369		0.27913	0.0709571	0	0	0	0.05588	0.0743591	0	0	0.336765	0	0	0	0.000788605	0	0		0.480326		1.74338	0.443181	0	0	0	0.349013	0.464429	0	0	2.10335	0
M36 LS1; 64 / 1 .	Ľubietová-Svätodušná	28.967	0.867	0	0	0.254646	2.373	2.348	0		37.744	0		0.146	0.064	0		72.7636		0.387815	0.0115704	0	0	0.00354432	0.029832	0.0582567	0	0	0.328437	0	0	0.00182358	0.000841179	0	0		0.491019		2.36945	0.0706922	0	0	0.0216549	0.182266	0.355934	0	0	2.00667	0
M36 LS1; 65 / 1 .	Ľubietová-Svätodušná	29.226	1.745	0	0	0.360824	1.749	2.321	0		37.614	0		0	0.047	0		73.0628		0.391283	0.0232876	0	0	0.00502216	0.0219874	0.0575868	0	0	0.327306	0	0	0	0.000617741	0	0		0.499167		2.35162	0.139959	0	0	0.0301833	0.132145	0.346097	0	0	1.96711	0
M36 LS1; 66 / 1 .	Ľubietová-Svätodušná	29.256	1.525	0	0	0.404915	1.148	1.941	0		38.037	0		0.11	0	0		72.4219		0.391684	0.0203516	0	0	0.00563584	0.014432	0.0481585	0	0	0.330987	0	0	0.00137393	0	0	0		0.480262		2.44669	0.127128	0	0	0.0352048	0.0901508	0.300826	0	0	2.06754	0
M36 LS1; 67 / 1 .	Ľubietová-Svätodušná	29.96	1.279	0	0	0	1.616	1.775	0		38.841	0.206		0	0.118	0		73.795		0.40111	0.0170687	0	0	0	0.0203154	0.0440399	0	0	0.337983	0.00290254	0	0	0.00155092	0	0		0.482534		2.49377	0.106119	0	0	0	0.126305	0.273804	0	0	2.1013	0.0180456
M36 LS1; 68 / 1 .	Ľubietová-Svätodušná	28.895	1.149	0.199	0	0.112476	2.003	2.743	0		39.156	0		0	0.075	0.062		74.3945		0.386851	0.0153338	0.00244534	0	0.00156551	0.0251806	0.0680571	0	0	0.340724	0	0	0	0.000985756	0.00121615	0		0.499434		2.32374	0.092107	0.0146887	0	0.00940372	0.151255	0.408806	0	0	2.04666	0
M36 LS1; 69 / 1 .	Ľubietová-Svätodušná	31.627	1.581	0.183	0	0.100779	1.872	1.571	0		36.868	0		0.084	0	0		73.8868		0.423428	0.021099	0.00224873	0	0.0014027	0.0235337	0.0389784	0	0	0.320814	0	0	0.00104918	0	0	0		0.51069		2.48738	0.123944	0.0132099	0	0.00824001	0.138247	0.228975	0	0	1.88459	0
M36 E1; 70 / 1 .	Ľubietová-Svätodušná	15.86	13.447	0	0.444	0.697353	8.461	1.176	0.062		41.698	0		0.083	0.315	0		82.2434		0.212336	0.179455	0	0.00625904	0.00970617	0.106367	0.029178	0.00110561	0	0.362844	0	0	0.00103669	0.00414018	0	0		0.543301		1.17248	0.990912	0	0.0345612	0.0535955	0.587337	0.161115	0.00610498	0	2.00355	0
M36 E1; 71 / 1 .	Ľubietová-Svätodušná	14.672	11.606	0	0.419	0.748642	7.402	0.939	0		36.81	0		0	0.507	0.128		73.2316		0.196431	0.154886	0	0.00590662	0.01042	0.0930538	0.0232977	0	0	0.32031	0	0	0	0.00666371	0.00251076	0		0.483995		1.21756	0.960046	0	0.0366116	0.0645877	0.576785	0.144409	0	0	1.98541	0
M36 E1; 72 / 1 .	Ľubietová-Svätodušná	15.866	12.047	0	0	0	5.299	2.006	0		38.093	0		0	0.054	0.074		73.439		0.212417	0.160771	0	0	0	0.066616	0.0497712	0	0	0.331474	0	0	0	0.000709745	0.00145153	0		0.489575		1.30164	0.985167	0	0	0	0.408207	0.304986	0	0	2.03119	0
M36 E1; 73 / 1 .	Ľubietová-Svätodušná	13.47	13.368	0	0	0	5.962	1.465	0		37.031	0		0.151	0	0		71.447		0.180339	0.1784	0	0	0	0.0749509	0.0363484	0	0	0.322233	0	0	0.00188603	0	0	0		0.470038		1.151	1.13863	0	0	0	0.478371	0.231992	0	0	2.05664	0
M36 E1; 74 / 1 .	Ľubietová-Svätodušná	13.818	9.927	0	0	0	6.422	3.863	0		38.657	0		0	0.067	0		72.754		0.184998	0.132479	0	0	0	0.0807338	0.0958456	0	0	0.336382	0	0	0	0.000880609	0	0		0.494056		1.12334	0.804437	0	0	0	0.49023	0.581992	0	0	2.04257	0
M36 E1; 75 / 1 .	Ľubietová-Svätodušná	13.155	10.729	0	0	0	7.029	3.793	0		37.407	0		0	0.058	0		72.171		0.176121	0.143182	0	0	0	0.0883646	0.0941088	0	0	0.325505	0	0	0	0.000762318	0	0		0.501777		1.05299	0.85605	0	0	0	0.52831	0.562653	0	0	1.94611	0
M36 E1; 76 / 1 .	Ľubietová-Svätodušná	13.384	12.42	0.205	0	0	10.793	0.301	0.098		41.112	0		0.089	0.207	0		78.609		0.179187	0.165749	0.00251907	0	0	0.135684	0.00746817	0.00174758	0	0.357745	0	0	0.00111164	0.00272069	0	0		0.490607		1.09571	1.01353	0.0154038	0	0	0.829688	0.0456669	0.0106863	0	2.18756	0
M36 E1; 77 / 1 .	Ľubietová-Svätodušná	11.804	12.705	0	0.113	0	10.276	0.479	0		39.497	0.232		0.286	0.14	0		75.532		0.158034	0.169552	0	0.00159295	0	0.129184	0.0118846	0	0	0.343691	0.00326888	0	0.00357222	0.00184008	0	0		0.470248		1.0082	1.08168	0	0.0101624	0	0.824144	0.0758189	0	0	2.19262	0.0208542
M36 E1; 78 / 1 .	Ľubietová-Svätodušná	14.692	12.296	0	0	0	6.889	1.715	0.117		35.993	0		0.173	0.096	0		71.971		0.196699	0.164094	0	0	0	0.0866046	0.0425512	0.0020864	0	0.3132	0	0	0.00216082	0.00126177	0	0		0.489949		1.20441	1.00476	0	0	0	0.530288	0.260545	0.0127752	0	1.91775	0
M36 E1; 79 / 1 .	Ľubietová-Svätodušná	13.532	11.843	0.231	0	0	6.522	2.561	0.062		39.362	0		0.19	0.069	0		74.372		0.181169	0.158049	0.00283856	0	0	0.0819909	0.0635414	0.00110561	0	0.342517	0	0	0.00237315	0.000906896	0	0		0.487588		1.11468	0.972431	0.0174649	0	0	0.504468	0.390953	0.00680255	0	2.10741	0
M36 E1; 80 / 1 .	Ľubietová-Svätodušná	14.467	9.156	0	0	0	6.741	4.964	0.081		38.638	0		0	0.054	0		74.101		0.193687	0.12219	0	0	0	0.0847441	0.123163	0.00144443	0	0.336216	0	0	0	0.000709745	0	0		0.523783		1.10935	0.699849	0	0	0	0.485377	0.705422	0.00827307	0	1.9257	0
M17 LSV8; 81 / 1 .	Ľubietová-Svätodušná	13.727	7.026	0	0	0	4.879	6.731	0		40.658	0.239		0.068	0.113	0		73.441		0.183779	0.0937643	0	0	0	0.061336	0.167004	0	0	0.353794	0.00336751	0	0.00084934	0.00148521	0	0		0.505884		1.08985	0.556042	0	0	0	0.363736	0.99037	0	0	2.09807	0.0199701
M17 LSV8; 82 / 1 .	Ľubietová-Svätodušná	16.996	7.153	0	0	0	4.923	3.569	0		40.65	0.267		0	0.101	0		73.659		0.227545	0.0954591	0	0	0	0.0618892	0.0885511	0	0	0.353724	0.00376203	0	0	0.00132749	0	0		0.473445		1.44185	0.60488	0	0	0	0.392163	0.561107	0	0	2.24139	0.0238382
M17 LSV8; 83 / 1 .	Ľubietová-Svätodušná	18.322	7.916	0	0	0	3.396	3.897	0		39.781	0		0.085	0.093	0		73.49		0.245298	0.105642	0	0	0	0.0426926	0.0966892	0	0	0.346163	0	0	0.00106167	0.00122234	0	0		0.490321		1.50084	0.646361	0	0	0	0.261212	0.591587	0	0	2.11797	0
M17 LSV8; 84 / 1 .	Ľubietová-Svätodušná	16.786	7.27	0	0	0	5.939	4.147	0		38.329	0.367		0	0.139	0		72.977		0.224734	0.0970205	0	0	0	0.0746618	0.102892	0	0	0.333528	0.00517103	0	0	0.00182694	0	0		0.499308		1.35027	0.58293	0	0	0	0.448591	0.618207	0	0	2.00394	0.0310692
M17 LSV8; 85 / 1 .	Ľubietová-Svätodušná	10.602	6.5	0	0	0	6.62	8.368	0		39.057	0		0	0.071	0		71.218		0.141941	0.0867446	0	0	0	0.0832229	0.20762	0	0	0.339863	0	0	0	0.000933183	0	0		0.519529		0.819635	0.500904	0	0	0	0.480568	1.19889	0	0	1.96252	0
M17 LSV8; 86 / 1 .	Ľubietová-Svätodušná	10.888	6.943	0	0	0	6.988	7.501	0		38.792	0.496		0	0	0		71.608		0.14577	0.0926566	0	0	0	0.0878492	0.186109	0	0	0.337557	0.00698864	0	0	0	0	0		0.512385		0.853482	0.542502	0	0	0	0.514355	1.08966	0	0	1.97638	0.0409183
M17 LSV8; 87 / 1 .	Ľubietová-Svätodušná	17.162	7.917	0	0	0	5.308	2.535	0		37.204	0.384		0.124	0	0		70.634		0.229768	0.105655	0	0	0	0.0667292	0.0628964	0	0	0.323738	0.00541056	0	0.0015488	0	0	0		0.465048		1.48222	0.681574	0	0	0	0.430466	0.405741	0	0	2.08842	0.0349032
M17 LSV8; 88 / 1 .	Ľubietová-Svätodušná	10.895	10.003	0	0.181	0	16.363	0.853	0		40.317	0		0.194	0.346	0		79.152		0.145864	0.133493	0	0.00255155	0	0.205706	0.0211639	0	0	0.350827	0	0	0.00242312	0.00454762	0	0		0.508779		0.860083	0.787139	0	0.0150451	0	1.21294	0.124792	0	0	2.06864	0
M17 LSV8; 89 / 1 .	Ľubietová-Svätodušná	13.244	9.07	0	0	0	15.097	0.272	0		39.277	0		0.116	0.432	0		77.508		0.177313	0.121042	0	0	0	0.189791	0.00674864	0	0	0.341777	0	0	0.00144887	0.00567796	0	0		0.494895		1.07485	0.733745	0	0	0	1.15049	0.0409096	0	0	2.07182	0
M17 LSV8; 90 / 1 .	Ľubietová-Svätodušná	14.369	12.164	0	0	0	7.278	0.543	0		36.06	0		0	0.187	0.085		70.686		0.192375	0.162333	0	0	0	0.0914949	0.0134725	0	0	0.313784	0	0	0	0.00245782	0.0016673	0		0.459675		1.25551	1.05944	0	0	0	0.597128	0.0879262	0	0	2.04786	0
M17 LSV8; 91 / 1 .	Ľubietová-Svätodušná	9.584	11.556	0	0	0	15.674	0.547	0.072		41.08	0.345		0.127	0.428	0		79.413		0.128312	0.154219	0	0	0	0.197045	0.0135717	0.00128394	0	0.357466	0.00486105	0	0.00158627	0.00562538	0	0		0.493147		0.780572	0.93817	0	0	0	1.1987	0.0825619	0.00781069	0	2.1746	0.0295716
M17 LSV8; 92 / 1 .	Ľubietová-Svätodušná	14.815	8.135	0	0	0	4.191	6.411	0		39.3	0.249		0	0.08	0		73.181		0.198346	0.108564	0	0	0	0.0526869	0.159065	0	0	0.341977	0.00350841	0	0	0.00105147	0	0		0.518661		1.14726	0.627949	0	0	0	0.304747	0.920048	0	0	1.97804	0.0202931
M17 LSV8; 93 / 1 .	Ľubietová-Svätodušná	12.728	8.503	0	0	0	4.026	6.568	0		38.649	0		0.092	0.088	0		70.654		0.170405	0.113475	0	0	0	0.0506126	0.16296	0	0	0.336312	0	0	0.00114911	0.00115662	0	0		0.497452		1.02766	0.684339	0	0	0	0.305231	0.982767	0	0	2.02821	0
M17 LSV8; 94 / 1 .	Ľubietová-Svätodušná	13.551	8.488	0	0	0	4.329	7.463	0		39.616	0.269		0	0.063	0		73.779		0.181423	0.113275	0	0	0	0.0544218	0.185166	0	0	0.344727	0.00379021	0	0	0.000828035	0	0		0.534286		1.01869	0.636037	0	0	0	0.305577	1.0397	0	0	1.93563	0.0212819
R2a-23 point 23	Rotgülden, Austria	0	0.0237	0.1352	0.2102	0.1409	0.0246	29.9	1.48	0	57.71	0	0	0.1858	0.0905	0	0.0297	89.9306		0	0.000316284	0.00166135	0.00296318	0.00196113	0.000309257	0.741854	0.0263921	0	0.502175	0	0	0.0023207	0.00118948	0	0.0006306		0.749066		0	0.00126672	0.00665371	0.0118675	0.0078543	0.00123857	2.97112	0.1057	0	2.01121	0
R2a-3 point 3	Rotgülden, Austria	0	0.0159	0	0.0702	0.1022	0	30.41	1.0521	0.0211	54.65	0.0046	0	0.0712	0.1986	0.0275	0.0109	86.6343		0	0.000212191	0	0.000989605	0.00142248	0	0.754508	0.0187616	9.45343e-05	0.475548	6.4814e-05	0	0.000889309	0.00261028	0.000539421	0.000231432		0.757132		0	0.000840767	0	0.00392113	0.00563632	0	2.9896	0.0743393	0.000374575	1.88427	0.000256814
R2a-5 point 5	Rotgülden, Austria	0	0.0595	0	0.1165	0.0529	0	30.21	1.0624	0	54.23	0.0253	0.0329	0.0756	0.2605	0	0.008	86.1336		0	0.000794047	0	0.00164229	0.000736293	0	0.749546	0.0189452	0	0.471893	0.000356477	0.000361777	0.000944266	0.00342386	0	0.000169859		0.752719		0	0.00316472	0	0.00654545	0.00293453	0	2.98736	0.0755073	0	1.88076	0.00142076
R2a-1 point 1	Rotgülden, Austria	0.0192	0	0	0.124	0.0471	0	30.54	0.6581	0.0561	54.53	0.0164	0.0008	0.0676	0.3459	0.0102	0	86.4154		0.000257053	0	0	0.00174802	0.000655565	0	0.757734	0.0117356	0.000251345	0.474504	0.000231076	8.79701e-06	0.000844344	0.00454631	0.000200076	0		0.760394		0.00101416	0	0	0.0068965	0.00258642	0	2.9895	0.0463006	0.000991636	1.87207	0.000911669
R2a-22 point 22	Rotgülden, Austria	0	0	0	0.2585	0.0139	0.0543	32.85	0.8903	0	56.95	0	0.0429	0.071	0.0638	0	0.0082	91.2029		0	0	0	0.00364406	0.000193468	0.000682629	0.815047	0.0158763	0	0.495562	0	0.00047174	0.000886811	0.00083855	0	0.000174105		0.819568		0	0	0	0.013339	0.000708184	0.00249874	2.98345	0.0581146	0	1.81399	0
R2a-4 point 4	Rotgülden, Austria	0.0077	0.0079	0	0.1458	0.1728	0	33.75	1.44	0.0877	56.73	0.0271	0.0268	0.1193	0.1211	0.0045	0	92.6407		0.000103089	0.000105428	0	0.00205533	0.00240513	0	0.837378	0.0256788	0.000392922	0.493648	0.000381839	0.0002947	0.00149009	0.00159167	8.82689e-05	0		0.842047		0.00036728	0.000375614	0	0.00732264	0.00856888	0	2.98337	0.0914871	0.00139988	1.75874	0.0013604
R2a-19 point 19	Rotgülden, Austria	0	0.0319	0.0439	0.6599	0.0634	0	33.5	2.49	0	56	0.0369	0	0.1122	0.0784	0	0	93.0166		0	0.000425716	0.000539449	0.00930257	0.000882438	0	0.831175	0.0444029	0	0.487296	0.000519921	0	0.00140141	0.00103044	0	0		0.842325		0	0.00151622	0.00192128	0.0331318	0.00314287	0	2.96029	0.158144	0	1.73554	0.00185174
Data from external sources
Siuda2018			0.07	0		0		27.06	1.04		43.33							71.5		0	0.000934173	0	0	0	0	0.671391	0.0185458	0	0.377045	0	0	0	0	0	0		0.672325		0	0.0041684	0	0	0	0	2.99583	0.0827537	0	1.68242	0
Siuda2018			0.08	0.22		0.06		24.94	0.98		44.55							70.83		0	0.00106763	0.00270339	0	0.000835115	0	0.618791	0.0174758	0	0.387661	0	0	0	0	0	0		0.623397		0	0.00513778	0.0130096	0	0.00401886	0	2.97783	0.0840997	0	1.86556	0
Siuda2018			0.03	0		0.03		25.71	0.93		43.89							70.59		0	0.00040036	0	0	0.000417557	0	0.637896	0.0165842	0	0.381918	0	0	0	0	0	0		0.638714		0	0.00188047	0	0	0.00196124	0	2.99616	0.0778951	0	1.79385	0
Siuda2018			0	0		0.03		26.7	0.79		42.44							69.96		0	0	0	0	0.000417557	0	0.662459	0.0140877	0	0.3693	0	0	0	0	0	0		0.662876		0	0	0	0	0.00188975	0	2.99811	0.063757	0	1.67135	0
Siuda2018			0.06	0		0.03		26.66	0.84		43.82							71.41		0	0.00080072	0	0	0.000417557	0	0.661466	0.0149793	0	0.381309	0	0	0	0	0	0		0.662685		0	0.00362489	0	0	0.0018903	0	2.99448	0.0678119	0	1.7262	0
Siuda2018			0.01	0		0		26.38	0.69		43.8							70.88		0	0.000133453	0	0	0	0	0.654519	0.0123044	0	0.381135	0	0	0	0	0	0		0.654653		0	0.000611561	0	0	0	0	2.99939	0.056386	0	1.74658	0
Siuda2018			0	0		0		25.58	0.26		44.36							70.2		0	0	0	0	0	0	0.63467	0.00463645	0	0.386008	0	0	0	0	0	0		0.63467		0	0	0	0	0	0	3	0.0219159	0	1.82461	0
Siuda2018			0	0		0		24.35	1.21		44.74							70.3		0	0	0	0	0	0	0.604152	0.0215773	0	0.389314	0	0	0	0	0	0		0.604152		0	0	0	0	0	0	3	0.107145	0	1.93319	0
Siuda2018			0	0		0		24.31	0.52		45.89							70.72		0	0	0	0	0	0	0.60316	0.0092729	0	0.399321	0	0	0	0	0	0		0.60316		0	0	0	0	0	0	3	0.0461216	0	1.98615	0
Siuda2018		3.91	25.93	0.31		0		4.26	0.47		39.51							74.39		0.0523477	0.346044	0.00380932	0	0	0	0.105696	0.00838127	0	0.343804	0	0	0	0	0	0		0.507897		0.309203	2.04398	0.0225005	0	0	0	0.624313	0.0495057	0	2.03075	0
Siuda2018		3.47	25.3	0.4		0		4.77	0.28		39.14							73.36		0.046457	0.337637	0.00491525	0	0	0	0.118349	0.0049931	0	0.340585	0	0	0	0	0	0		0.507358		0.274699	1.99644	0.0290638	0	0	0	0.699797	0.0295241	0	2.01387	0
Siuda2018		3.54	24.35	0.17		0		5.02	0.3		39.8							73.18		0.0473941	0.324959	0.00208898	0	0	0	0.124552	0.00534975	0	0.346328	0	0	0	0	0	0		0.498994		0.284938	1.95368	0.0125592	0	0	0	0.74882	0.0321632	0	2.08216	0
Siuda2018		3.53	21.71	0		0		8.47	0.44		39.61							73.76		0.0472602	0.289727	0	0	0	0	0.210151	0.0078463	0	0.344675	0	0	0	0	0	0		0.547138		0.259132	1.5886	0	0	0	0	1.15227	0.0430219	0	1.88988	0
Siuda2018		3.59	21.33	0.18		0		7.15	0.59		39.99							72.83		0.0480635	0.284656	0.00221186	0	0	0	0.1774	0.0105212	0	0.347981	0	0	0	0	0	0		0.512331		0.28144	1.66683	0.0129518	0	0	0	1.03878	0.0616076	0	2.03763	0
Siuda2018		4.47	21.14	0.38		0		7.22	0.4		39.79							73.4		0.0598451	0.28212	0.00466949	0	0	0	0.179137	0.007133	0	0.346241	0	0	0	0	0	0		0.525772		0.34147	1.60975	0.0266436	0	0	0	1.02214	0.0407002	0	1.97562	0
Siuda2018		3.5	20.3	0.16		0		9.09	0.38		40.68							74.11		0.0468586	0.27091	0.0019661	0	0	0	0.225534	0.00677635	0	0.353985	0	0	0	0	0	0		0.545269		0.25781	1.49051	0.0108172	0	0	0	1.24086	0.0372826	0	1.94758	0
Siuda2018		3.75	19.1	0.14		0		8.97	0.44		40.27							72.67		0.0502056	0.254896	0.00172034	0	0	0	0.222556	0.0078463	0	0.350418	0	0	0	0	0	0		0.529378		0.284517	1.4445	0.0097492	0	0	0	1.26123	0.0444652	0	1.98583	0
Siuda2018		3.06	19.03	0		0		9.11	0.59		40.32							72.11		0.0409678	0.253962	0	0	0	0	0.22603	0.0105212	0	0.350853	0	0	0	0	0	0		0.520959		0.235917	1.46246	0	0	0	0	1.30162	0.0605873	0	2.02042	0
Siuda2018		3.43	19.18	0.63		0		9.43	0.68		42.02							75.37		0.0459214	0.255963	0.00774152	0	0	0	0.233969	0.0121261	0	0.365646	0	0	0	0	0	0		0.543596		0.253431	1.41261	0.0427239	0	0	0	1.29123	0.0669216	0	2.01793	0
Dumanska 2018: 1		2.919	23.841	0.039	0.017	0.296	0.014	11.117	0.014	0.000	42.818	0.000		0.000	0.000			81.331		0.0390801	0.318166	0.000479237	0.000239648	0.0041199	0.000176	0.275826	0.000249655	0	0.37259	0	0	0	0	0	0		0.638087		0.183737	1.49587	0.00225316	0.00112672	0.0193699	0.000827474	1.29681	0.00117377	0	1.75175	0
Dumanska 2018: 2		2.540	23.183	0.106	0.087	0.206	0.005	10.675	0.000	0.000	39.720	0.055		0.000	0.060			76.998		0.034006	0.309385	0.00130254	0.00122643	0.00286723	6.28572e-05	0.264859	0	0	0.345632	0.00077495	0	0	0.000788605	0	0		0.613709		0.166232	1.51237	0.00636722	0.00599519	0.0140159	0.000307265	1.29471	0	0	1.68955	0.0037882
Dumanska 2018: 3		2.697	23.595	0.120	0.060	0.297	0.000	10.603	0.000	0.000	45.103	0.000		0.000	0.061			82.704		0.0361079	0.314883	0.00147457	0.000845816	0.00413382	0	0.263073	0	0	0.392473	0	0	0	0.000801749	0	0		0.620518		0.17457	1.52236	0.00712908	0.00408924	0.0199856	0	1.27187	0	0	1.89748	0
Dumanska 2018: 4		2.158	24.833	0.135	0.107	0.468	0.000	9.439	0.000	0.000	38.431	0.017		0.010	0.042			75.948		0.0288917	0.331405	0.0016589	0.00150837	0.0065139	0	0.234193	0	0	0.334415	0.00023953	0	0.000124903	0.000552024	0	0		0.60417		0.143461	1.64559	0.00823723	0.0074898	0.0323447	0	1.16288	0	0	1.66054	0.00118938
Dumanska 2018: 5		2.529	29.627	0.201	0.042	0.364	0.000	5.126	0.000	0.000	37.338	0.000		0.012	0.000			75.239		0.0338587	0.395382	0.00246991	0.000592071	0.00506636	0	0.127182	0	0	0.324904	0	0	0.000149883	0	0	0		0.564551		0.179924	2.10104	0.013125	0.00314624	0.0269224	0	0.67584	0	0	1.72653	0
Dumanska 2018: 6		2.558	28.065	0.314	0.086	0.380	0.013	5.220	0.000	0.019	39.144	0.000		0.004	0.036			75.844		0.0342469	0.374537	0.00385847	0.00121234	0.00528906	0.000163429	0.129514	0	8.51257e-05	0.34062	0	0	4.99612e-05	0.000473163	0	0		0.548821		0.187203	2.04731	0.0210914	0.00662695	0.0289114	0.000893344	0.707959	0	0.000465319	1.86192	0
Dumanska 2018: 7		2.210	21.616	0.230	0.106	0.049	0.000	12.863	0.000	0.000	37.747	0.000		0.034	0.044			74.962		0.0295879	0.288473	0.00282627	0.00149428	0.000682011	0	0.319146	0	0	0.328463	0	0	0.00042467	0.00057831	0	0		0.642209		0.138216	1.34756	0.0132026	0.00698032	0.00318593	0	1.49085	0	0	1.53437	0
Dumanska 2018: 8		1.989	29.265	0.167	0.046	0.253	0.012	5.195	0.000	0.142	34.556	0.042		0.004	0.000			71.772		0.0266291	0.390551	0.00205212	0.000648459	0.0035214	0.000150857	0.128894	0	0.000636202	0.300696	0.00059178	0	4.99612e-05	0	0	0		0.552447		0.144606	2.12084	0.0111438	0.00352138	0.0191226	0.000819213	0.699945	0	0.00345482	1.6329	0.00321359
Dumanska 2018: 9		2.432	30.540	0.008	0.130	0.406	0.000	5.107	0.000	0.000	39.681	0.016		0.062	0.000			78.404		0.03256	0.407566	9.8305e-05	0.0018326	0.00565094	0	0.126711	0	0	0.345292	0.00022544	0	0.000774398	0	0	0		0.574419		0.17005	2.12858	0.000513414	0.00957107	0.029513	0	0.661768	0	0	1.80335	0.0011774
Dumanska 2018: 10		2.233	31.120	0.267	0.278	0.367	0.000	3.653	0.000	0.008	39.128	0.000		0.038	0.000			77.116		0.0298958	0.415307	0.00328093	0.00391895	0.00510812	0	0.0906353	0	3.58424e-05	0.34048	0	0	0.000474631	0	0	0		0.548146		0.16362	2.27297	0.0179565	0.0214484	0.0279567	0	0.496047	0	0.000196165	1.86345	0
Dumanska 2018: 11		2.845	28.879	0.419	0.387	0.588	0.000	3.772	0.000	0.026	38.066	0.071		0.038	0.034			75.125		0.0380893	0.3854	0.00514872	0.00545551	0.00818413	0	0.0935878	0	0.000116488	0.331239	0.00100039	0	0.000474631	0.000446876	0	0		0.535865		0.21324	2.15763	0.0288247	0.0305423	0.0458182	0	0.523944	0	0.000652148	1.85442	0.00560061
Dumanska 2018: 12		2.319	28.663	0.222	0.411	0.509	0.000	3.033	0.000	0.011	37.596	0.057		0.006	0.049			73.064		0.0310472	0.382517	0.00272796	0.00579384	0.00708456	0	0.0752523	0	4.92833e-05	0.327149	0.00080313	0	7.49417e-05	0.000644028	0	0		0.504423		0.18465	2.27498	0.0162243	0.0344582	0.0421346	0	0.447555	0	0.000293107	1.94568	0.00477653
Dumanska 2018: 13		1.444	34.111	0.273	0.224	0.692	0.000	2.191	0.000	0.000	35.844	0.000		0.000	0.001			75.001		0.0193325	0.455222	0.00335466	0.00315771	0.00963166	0	0.0543613	0	0	0.311904	0	0	0	1.31434e-05	0	0		0.54506		0.106406	2.50553	0.018464	0.01738	0.0530124	0	0.299203	0	0	1.71671	0
Dumanska 2018: 14		1.282	33.300	0.060	0.171	0.852	0.000	2.057	0.000	0.000	35.658	0.035		0.000	0.035			73.542		0.0171636	0.444399	0.000737287	0.00241058	0.0118586	0	0.0510366	0	0	0.310285	0.00049315	0	0	0.00046002	0	0		0.527606		0.0975935	2.52688	0.00419226	0.0137067	0.0674289	0	0.290197	0	0	1.7643	0.00280408
Dumanska 2018: 15		2.131	32.522	0.225	0.325	0.781	0.000	2.215	0.001	0.240	40.091	0.005		0.029	0.055			79.114		0.0285302	0.434017	0.00276483	0.0045815	0.0108704	0	0.0549568	1.78325e-05	0.00107527	0.34886	7.045e-05	0	0.000362218	0.000722888	0	0		0.53572		0.159767	2.43047	0.0154829	0.0256561	0.0608736	0	0.307754	9.98608e-05	0.00602145	1.95359	0.000394516
Dumanska 2018: 16		1.855	34.732	0.221	0.191	0.868	0.000	2.250	0.000	0.044	38.782	0.026		0.053	0.007			79.216		0.0248351	0.46351	0.00271567	0.00269251	0.0120813	0	0.0558252	0	0.000197133	0.33747	0.00036634	0	0.000661985	9.20039e-05	0	0		0.56166		0.132652	2.47575	0.0145053	0.0143816	0.0645302	0	0.29818	0	0.00105295	1.80253	0.00195674
Dumanska 2018: 17		1.491	32.302	0.172	0.343	0.619	0.000	2.710	0.005	0.000	37.781	0.030		0.022	0.000			75.642		0.0199618	0.431081	0.00211356	0.00483525	0.0086156	0	0.0672383	8.91625e-05	0	0.328759	0.0004227	0	0.000274786	0	0	0		0.533845		0.112177	2.4225	0.0118774	0.0271722	0.0484163	0	0.377853	0.000501058	0	1.8475	0.00237541
Dumanska 2018: 18		1.580	31.744	0.096	0.214	0.786	0.000	2.226	0.000	0.000	37.157	0.000		0.000	0.026			73.862		0.0211533	0.423634	0.00117966	0.00301674	0.01094	0	0.0552297	0	0	0.323329	0	0	0	0.000341729	0	0		0.515153		0.123186	2.46704	0.00686976	0.017568	0.0637092	0	0.321631	0	0	1.88291	0
Dumanska 2018: 19		1.923	31.976	0.193	0.250	0.573	0.000	2.443	0.000	0.063	39.316	0.046		0.030	0.008			76.828		0.0257455	0.42673	0.00237161	0.00352423	0.00797535	0	0.0606137	0	0.000282259	0.342116	0.00064814	0	0.000374709	0.000105147	0	0		0.526961		0.14657	2.42939	0.0135016	0.0200636	0.0454039	0	0.345076	0	0.00160691	1.94768	0.00368988
Dumanska 2018: 20		1.993	32.130	0.298	0.302	0.740	0.000	2.129	0.000	0.055	36.969	0.000		0.000	0.000			74.624		0.0266826	0.428785	0.00366186	0.00425727	0.0102998	0	0.052823	0	0.000246416	0.321693	0	0	0	0	0	0		0.52651		0.152035	2.44318	0.0208649	0.0242575	0.0586869	0	0.30098	0	0.00140406	1.83298	0
Dumanska 2018: 21		1.800	31.214	0.356	0.338	0.558	0.000	2.844	0.000	0.012	39.460	0.016		0.000	0.069			76.786		0.0240987	0.416561	0.00437457	0.00476476	0.00776657	0	0.070563	0	5.37636e-05	0.343369	0.00022544	0	0	0.000906896	0	0		0.528129		0.136891	2.36625	0.0248495	0.0270659	0.0441175	0	0.400829	0	0.0003054	1.95049	0.0012806
Dumanska 2018: 22		1.995	30.196	0.287	0.121	0.599	0.057	3.204	0.000	0.032	37.988	0.000		0.009	0.038			74.556		0.0267094	0.402976	0.00352669	0.00170573	0.00833723	0.000716572	0.079495	0	0.00014337	0.33056	0	0	0.000112413	0.00049945	0	0		0.523466		0.153072	2.30946	0.0202116	0.00977558	0.0477809	0.00410669	0.455588	0	0.000821655	1.89445	0
Dumanska 2018: 23		1.298	32.458	0.057	0.266	0.693	0.000	2.262	0.009	0.000	39.968	0.000		0.000	0.014			77.446		0.0173778	0.433163	0.000700423	0.00374979	0.00964558	0	0.0561229	0.000160492	0	0.34779	0	0	0	0.000184008	0	0		0.520759		0.100111	2.49537	0.00403501	0.0216018	0.0555664	0	0.323314	0.000924568	0	2.00355	0
Dumanska 2018: 24		1.298	33.672	0.170	0.330	0.937	0.000	2.023	0.006	0.084	41.783	0.135		0.000	0.007			80.529		0.0173778	0.449364	0.00208898	0.00465199	0.0130417	0	0.050193	0.000106995	0.000376345	0.363583	0.00190215	0	0	9.20039e-05	0	0		0.536717		0.0971341	2.51173	0.0116764	0.0260024	0.0728971	0	0.280556	0.000598052	0.00210359	2.03226	0.0106321
Dumanska 2018: 25		1.767	28.666	0.077	0.261	0.523	0.000	4.775	0.000	0.000	38.369	0.036		0.004	0.057			74.635		0.0236569	0.382557	0.000946185	0.0036793	0.00727942	0	0.118473	0	0	0.333876	0.00050724	0	4.99612e-05	0.000749175	0	0		0.536592		0.132262	2.13881	0.00528997	0.0205704	0.040698	0	0.662365	0	0	1.86664	0.0028359
Dumanska 2018: 26		2.241	28.259	0.016	0.202	0.402	0.000	4.796	0.000	0.030	40.350	0.000		0.005	0.081			76.382		0.0300029	0.377126	0.00019661	0.00284758	0.00559527	0	0.118994	0	0.000134409	0.351114	0	0	6.24514e-05	0.00106462	0	0		0.534762		0.168315	2.11566	0.00110298	0.0159748	0.0313893	0	0.667555	0	0.00075403	1.96974	0
Dumanska 2018: 27		2.289	29.272	0.291	0.236	0.389	0.000	4.669	0.000	0.000	41.928	0.000		0.028	0.000			79.122		0.0306455	0.390644	0.00357584	0.00332688	0.00541433	0	0.115843	0	0	0.364845	0	0	0.000349728	0	0	0		0.54945		0.167325	2.13292	0.0195241	0.0181648	0.0295622	0	0.632505	0	0	1.99205	0
Dumanska 2018: 28		2.229	28.012	0.132	0.285	0.526	0.000	4.899	0.004	0.047	40.731	0.000		0.027	0.000			76.911		0.0298422	0.373829	0.00162203	0.00401763	0.00732117	0	0.12155	7.133e-05	0.000210574	0.354429	0	0	0.000337238	0	0	0		0.538182		0.16635	2.08384	0.00904172	0.0223955	0.0408106	0	0.677558	0.000397616	0.00117381	1.9757	0
Dumanska 2018: 29		2.356	29.647	0.148	0.225	0.369	0.000	5.119	0.000	0.000	41.714	0.036		0.000	0.027			79.799		0.0315425	0.395649	0.00181864	0.00317181	0.00513596	0	0.127008	0	0	0.362983	0.00050724	0	0	0.000354872	0	0		0.564326		0.167682	2.1033	0.00966803	0.0168616	0.0273031	0	0.675186	0	0	1.92964	0.00269653
Dumanska 2018: 30		2.142	25.776	0.024	0.065	1.180	0.041	6.744	0.000	0.037	42.423	0.047		0.000	0.000			78.703		0.0286775	0.343989	0.000294915	0.000916301	0.0164239	0.000515429	0.167327	0	0.000165771	0.369152	0.00066223	0	0	0	0	0		0.558144		0.15414	1.84893	0.00158516	0.00492508	0.0882779	0.00277041	0.899374	0	0.000891013	1.98418	0.00355946
Dumanska 2018: 31		1.282	32.295	0.207	0.135	0.612	0.136	2.955	0.000	0.000	39.176	0.076		0.000	0.022			76.908		0.0171636	0.430987	0.00254364	0.00190309	0.00851817	0.00170972	0.0733171	0	0	0.340898	0.00107084	0	0	0.000289155	0	0		0.536143		0.0960396	2.4116	0.014233	0.0106488	0.0476637	0.00956676	0.410247	0	0	1.9075	0.00599191
Dumanska 2018: 32		0.985	32.519	0.065	0.196	0.809	0.000	2.207	0.000	0.023	39.150	0.000		0.040	0.052			76.162		0.0131873	0.433977	0.000798728	0.002763	0.0112601	0	0.0547583	0	0.000103047	0.340672	0	0	0.000499612	0.000683458	0	0		0.516744		0.0765602	2.51949	0.00463708	0.0160408	0.0653716	0	0.317904	0	0.000598247	1.9778	0
Dumanska 2018: 33		1.175	33.106	0.217	0.190	0.628	0.000	1.999	0.000	0.187	40.435	0.058		0.064	0.099			78.418		0.0157311	0.44181	0.00266652	0.00267842	0.00874087	0	0.0495976	0	0.000837816	0.351853	0.00081722	0	0.000799378	0.0013012	0	0		0.521225		0.0905431	2.54292	0.0153476	0.0154161	0.0503096	0	0.285467	0	0.00482219	2.02515	0.00470365
Dumanska 2018: 34		1.322	32.311	0.174	0.196	0.566	0.000	2.617	0.000	0.000	37.446	0.000		0.042	0.067			74.783		0.0176992	0.431201	0.00213813	0.002763	0.00787792	0	0.0649309	0	0	0.325844	0	0	0.000524592	0.000880609	0	0		0.52661		0.100829	2.45647	0.0121806	0.0157403	0.044879	0	0.369899	0	0	1.85627	0
Dumanska 2018: 35		1.830	33.211	0.195	0.443	0.549	0.045	2.608	0.051	0.000	41.213	0.030		0.000	0.000			80.339		0.0245004	0.443212	0.00239618	0.00624494	0.0076413	0.000565715	0.0647076	0.000909457	0	0.358623	0.0004227	0	0	0	0	0		0.549268		0.133816	2.42074	0.0130875	0.0341087	0.0417354	0.00308983	0.353421	0.00496729	0	1.95874	0.00230871
Dumanska 2018: 36		1.423	35.522	0.231	0.468	1.012	0.075	1.785	0.000	0.108	42.947	0.049		0.058	0.019			83.708		0.0190514	0.474053	0.00283856	0.00659737	0.0140856	0.000942858	0.044288	0	0.000483872	0.373712	0.00069041	0	0.000724437	0.000249725	0	0		0.561856		0.101724	2.53118	0.0151563	0.0352263	0.0752093	0.00503433	0.236473	0	0.00258361	1.99541	0.00368641
Dumanska 2018: 37		1.427	31.143	0.139	0.237	0.821	0.000	2.410	0.000	0.017	38.213	0.000		0.080	0.000			74.504		0.0191049	0.415614	0.00170805	0.00334097	0.0114272	0	0.059795	0	7.61651e-05	0.332518	0	0	0.000999223	0	0	0		0.51099		0.112164	2.44005	0.0100279	0.0196147	0.0670884	0	0.351054	0	0.000447162	1.9522	0
Dumanska 2018: 38		3.558	28.533	0.345	0.462	0.399	0.000	3.854	0.000	0.029	41.857	0.000		0.004	0.065			79.247		0.0476351	0.380782	0.0042394	0.00651278	0.00555351	0	0.0956223	0	0.000129929	0.364227	0	0	4.99612e-05	0.000854322	0	0		0.540345		0.26447	2.1141	0.0235372	0.036159	0.0308331	0	0.530896	0	0.000721365	2.02219	0
Dumanska 2018: 39		1.993	29.358	0.182	0.473	0.509	0.000	3.929	0.000	0.002	35.196	0.000		0.027	0.000			71.670		0.0266826	0.391792	0.00223644	0.00666785	0.00708456	0	0.0974832	0	8.9606e-06	0.306265	0	0	0.000337238	0	0	0		0.531947		0.150481	2.20958	0.0126128	0.0376044	0.0399545	0	0.549772	0	5.05347e-05	1.72723	0
Dumanska 2018: 40		2.121	30.428	0.310	0.456	0.423	0.000	4.002	0.000	0.000	42.914	0.000		0.073	0.000			80.956		0.0283963	0.406072	0.00380932	0.0064282	0.00588756	0	0.0992944	0	0	0.373425	0	0	0.000911791	0	0	0		0.549887		0.154921	2.21539	0.0207824	0.0350701	0.0321205	0	0.541717	0	0	2.03728	0
Dumanska 2018: 41		2.038	28.340	0.228	0.342	0.419	0.000	4.498	0.000	0.045	38.884	0.000		0.000	0.000			74.830		0.0272851	0.378207	0.00280169	0.00482115	0.00583189	0	0.111601	0	0.000201613	0.338357	0	0	0	0	0	0		0.530547		0.154285	2.13858	0.0158423	0.0272614	0.0329766	0	0.631051	0	0.00114003	1.91325	0
Dumanska 2018: 42		1.451	28.975	0.110	0.279	0.403	0.106	4.479	0.000	0.000	39.847	0.047		0.077	0.000			75.817		0.0194262	0.386681	0.00135169	0.00393305	0.00560919	0.00133257	0.111129	0	0	0.346737	0.00066223	0	0.000961752	0	0	0		0.529463		0.110071	2.19098	0.00765886	0.0222851	0.0317823	0.00755051	0.629672	0	0	1.96465	0.00375228
Dumanska 2018: 43		2.371	32.471	0.180	0.511	0.867	0.000	2.264	0.000	0.048	39.042	0.000		0.010	0.081			77.918		0.0317434	0.433336	0.00221186	0.00720353	0.0120674	0	0.0561725	0	0.000215054	0.339732	0	0	0.000124903	0.00106462	0	0		0.542735		0.175463	2.39529	0.0122262	0.039818	0.0667034	0	0.310497	0	0.00118873	1.87789	0
Dumanska 2018: 44		1.611	31.353	0.255	0.266	0.939	0.000	2.291	0.006	0.000	39.062	0.000		0.000	0.000			75.822		0.0215683	0.418416	0.00313347	0.00374979	0.0130695	0	0.0568424	0.000106995	0	0.339906	0	0	0	0	0	0		0.51678		0.125208	2.42898	0.0181904	0.0217682	0.0758711	0	0.329981	0.000621125	0	1.97322	0
Dumanska 2018: 45		1.782	34.042	0.200	0.415	0.901	0.000	2.519	0.000	0.000	42.406	0.000		0.000	0.044			82.442		0.0238577	0.454302	0.00245762	0.00585023	0.0125406	0	0.0624994	0	0	0.369005	0	0	0	0.00057831	0	0		0.561507		0.127466	2.42723	0.0131305	0.0312564	0.0670017	0	0.333919	0	0	1.9715	0
Dumanska 2018: 46		1.516	32.397	0.329	0.598	0.931	0.000	2.388	0.000	0.000	41.337	0.000		0.075	0.049			79.736		0.0202965	0.432349	0.00404279	0.00842997	0.0129582	0	0.0592491	0	0	0.359702	0	0	0.000936772	0.000644028	0	0		0.537325		0.113319	2.41389	0.0225718	0.0470663	0.0723484	0	0.3308	0	0	2.00829	0
Dumanska 2018: 47		1.544	29.683	0.274	0.229	0.534	0.000	4.313	0.000	0.034	41.099	0.000		0.017	0.082			78.233		0.0206713	0.396129	0.00336695	0.0032282	0.00743252	0	0.107011	0	0.00015233	0.357631	0	0	0.000212335	0.00107776	0	0		0.537839		0.115302	2.20956	0.0187804	0.0180065	0.0414577	0	0.596892	0	0.000849679	1.99482	0
Dumanska 2018: 48		1.528	28.633	0.211	0.488	0.516	0.000	5.179	0.000	0.000	42.333	0.021		0.000	0.048			79.070		0.0204571	0.382117	0.00259279	0.0068793	0.00718199	0	0.128497	0	0	0.368369	0.00029589	0	0	0.000630884	0	0		0.547725		0.112048	2.09293	0.0142013	0.0376793	0.0393372	0	0.703805	0	0	2.01763	0.00162065
Dumanska 2018: 49		2.010	28.711	0.429	0.606	0.621	0.000	4.849	0.000	0.000	43.275	0.018		0.025	0.027			80.585		0.0269102	0.383158	0.0052716	0.00854274	0.00864344	0	0.120309	0	0	0.376566	0.00025362	0	0.000312257	0.000354872	0	0		0.552835		0.14603	2.07923	0.0286067	0.0463578	0.0469043	0	0.652868	0	0	2.04346	0.00137629
Dumanska 2018: 50		1.568	28.646	0.383	0.421	0.483	0.000	4.909	0.000	0.001	40.284	0.000		0.033	0.000			76.792		0.0209927	0.38229	0.00470635	0.00593481	0.00672268	0	0.121798	0	4.4803e-06	0.35054	0	0	0.00041218	0	0	0		0.542445		0.1161	2.11426	0.0260285	0.0328226	0.0371799	0	0.673606	0	2.47784e-05	1.93866	0
Dumanska 2018: 51		1.546	30.463	0.233	0.551	0.674	0.000	3.886	0.000	0.000	40.820	0.000		0.017	0.057			78.433		0.0206981	0.406539	0.00286313	0.00776741	0.00938112	0	0.0964163	0	0	0.355204	0	0	0.000212335	0.000749175	0	0		0.543665		0.114214	2.24332	0.0157991	0.0428614	0.051766	0	0.532035	0	0	1.96005	0
Dumanska 2018: 52		1.959	29.724	0.269	0.630	0.503	0.000	3.675	0.000	0.028	40.162	0.000		0.000	0.059			77.371		0.0262274	0.396677	0.0033055	0.00888107	0.00700105	0	0.0911811	0	0.000125448	0.349478	0	0	0	0.000775462	0	0		0.533273		0.147546	2.23156	0.0185956	0.0499617	0.0393854	0	0.512952	0	0.000705727	1.96604	0
Dumanska 2018: 53		1.940	29.489	0.307	0.618	0.709	0.000	3.542	0.000	0.000	40.699	0.012		0.000	0.000			77.372		0.0259731	0.39354	0.00377245	0.00871191	0.00986827	0	0.0878812	0	0	0.354151	0.00016908	0	0	0	0	0		0.529747		0.147087	2.22865	0.0213637	0.0493362	0.0558848	0	0.497678	0	0	2.00558	0.000957513
Dumanska 2018: 54		2.435	31.772	0.309	0.373	0.708	0.000	5.302	0.000	0.117	48.073	0.015		0.040	0.036			89.187		0.0326002	0.424008	0.00379703	0.00525816	0.00985436	0	0.131549	0	0.000524195	0.418317	0.00021135	0	0.000499612	0.000473163	0	0		0.607066		0.161104	2.09536	0.0187642	0.0259848	0.0486982	0	0.650088	0	0.00259047	2.06724	0.00104445
Dumanska 2018: 55		1.848	31.808	0.363	0.450	0.574	0.000	5.230	0.060	0.000	48.554	0.000		0.021	0.080			89.155		0.0247413	0.424488	0.00446059	0.00634362	0.00798927	0	0.129763	0.00106995	0	0.422503	0	0	0.000262296	0.00105147	0	0		0.597785		0.124165	2.1303	0.0223856	0.0318356	0.0400943	0	0.651216	0.00536957	0	2.12034	0
Dumanska 2018: 56		1.825	30.622	0.462	0.506	0.488	0.000	3.826	0.000	0.000	41.482	0.000		0.014	0.107			79.363		0.0244334	0.408661	0.00567711	0.00713305	0.00679227	0	0.0949276	0	0	0.360964	0	0	0.000174864	0.00140635	0	0		0.547624		0.133851	2.23873	0.0311004	0.0390763	0.0372095	0	0.520033	0	0	1.97744	0
Dumanska 2018: 57		2.154	28.158	0.465	0.600	0.465	0.029	4.036	0.007	0.061	40.015	0.088		0.011	0.033			76.262		0.0288381	0.375778	0.00571398	0.00845816	0.00647214	0.000364572	0.100138	0.000124827	0.000273298	0.348199	0.00123992	0	0.000137393	0.000433733	0	0		0.525763		0.16455	2.14419	0.0326039	0.0482622	0.03693	0.00208024	0.571387	0.000712265	0.00155944	1.98682	0.00707498
Dumanska 2018: 58		1.741	28.791	0.252	0.340	0.597	0.014	4.745	0.000	0.027	38.864	0.014		0.001	0.040			75.585		0.0233088	0.384225	0.00309661	0.00479296	0.00830939	0.000176	0.117729	0	0.000120968	0.338183	0.00019726	0	1.24903e-05	0.000525737	0	0		0.541638		0.129102	2.12813	0.0171513	0.026547	0.0460237	0.000974821	0.652072	0	0.000670012	1.87311	0.00109257
Dumanska 2018: 59		1.761	27.854	0.474	0.246	0.461	0.044	4.515	0.018	0.000	39.508	0.032		0.036	0.008			75.147		0.0235766	0.371721	0.00582457	0.00346785	0.00641647	0.000553143	0.112023	0.000320985	0	0.343787	0.00045088	0	0.00044965	0.000105147	0	0		0.523582		0.135088	2.12987	0.0333734	0.0198699	0.0367648	0.00316938	0.641862	0.00183917	0	1.96982	0.00258344
Dumanska 2018: 60		2.286	29.889	0.123	0.258	0.517	0.000	4.367	0.000	0.061	40.445	0.164		0.000	0.000			78.292		0.0306054	0.398878	0.00151144	0.00363701	0.00719591	0	0.10835	0	0.000273298	0.35194	0.00231076	0	0	0	0	0		0.550179		0.166884	2.17499	0.00824154	0.0198318	0.0392377	0	0.590811	0	0.00149023	1.91905	0.0126001
Dumanska 2018: 61		1.935	30.764	0.122	0.324	0.517	0.000	2.785	0.015	0.000	42.992	0.015		0.069	0.009			79.710		0.0259061	0.410556	0.00149915	0.00456741	0.00719591	0	0.0690992	0.000267487	0	0.374104	0.00021135	0	0.00086183	0.000118291	0	0		0.518823		0.149797	2.37396	0.00866856	0.0264102	0.041609	0	0.399553	0.0015467	0	2.16319	0.00122209
Dumanska 2018: 62		1.373	30.904	0.181	0.205	0.565	0.000	3.105	0.000	0.005	37.494	0.000		0.000	0.077			74.079		0.018382	0.412424	0.00222415	0.00288987	0.007864	0	0.0770387	0	2.24015e-05	0.326262	0	0	0	0.00101204	0	0		0.520823		0.105882	2.37561	0.0128114	0.016646	0.0452976	0	0.443752	0	0.000129035	1.87931	0
Dumanska 2018: 63		1.902	32.449	0.233	0.267	0.792	0.000	2.503	0.000	0.047	38.254	0.000		0.000	0.000			76.454		0.0254643	0.433043	0.00286313	0.00376388	0.0110235	0	0.0621024	0	0.000210574	0.332875	0	0	0	0	0	0		0.53826		0.141926	2.41357	0.0159577	0.0209781	0.0614398	0	0.346129	0	0.00117364	1.85528	0
Dumanska 2018: 64		1.763	31.350	0.305	0.284	0.800	0.056	2.364	0.000	0.054	41.748	0.119		0.028	0.020			78.932		0.0236033	0.418376	0.00374788	0.00400353	0.0111349	0.000704	0.0586536	0	0.000241936	0.363279	0.00167671	0	0.000349728	0.000262868	0	0		0.520223		0.136115	2.41267	0.0216131	0.0230874	0.064212	0.0040598	0.338241	0	0.00139519	2.09494	0.00966918
Dumanska 2018: 65		2.195	32.350	0.185	0.385	0.850	0.000	2.380	0.049	0.054	39.618	0.000		0.020	0.000			78.305		0.029387	0.431721	0.0022733	0.00542732	0.0118308	0	0.0590506	0.000873792	0.000241936	0.344744	0	0	0.000249806	0	0	0		0.53969		0.163355	2.39983	0.0126367	0.0301691	0.0657643	0	0.328247	0.00485719	0.00134486	1.91634	0
Ciesielczuk-Miedzianka		0	25.88	12.59	0	0.09	0	0.53	0.16	0	39.86	0	0	0.08	0.07	0	0	79.26		0	0.345377	0.154707	0	0.00125267	0	0.0131499	0.0028532	0	0.34685	0	0	0.000999223	0.000920039	0	0		0.514487		0	2.01391	0.902107	0	0.00730439	0	0.0766779	0.0166371	0	2.0225	0
Ciesielczuk-Miedzianka		0	30.17	4.27	0	0	0	0.95	0.61	0	38.69	0	0	0.09	0.14	0	0	74.91		0	0.402629	0.0524703	0	0	0	0.0235706	0.0108778	0	0.336669	0	0	0.00112413	0.00184008	0	0		0.478669		0	2.52342	0.328851	0	0	0	0.147726	0.0681754	0	2.11003	0
Ciesielczuk-Miedzianka		0	32.15	3.6	0	0.14	0	0.9	0.38	0	39.49	0	0	0.1	0.02	0	0	76.78		0	0.429052	0.0442372	0	0.0019486	0	0.0223301	0.00677635	0	0.34363	0	0	0.00124903	0.000262868	0	0		0.497568		0	2.5869	0.266721	0	0.0117488	0	0.134635	0.0408568	0	2.07186	0
Ciesielczuk-Miedzianka		0	33.86	1.9	0	0.52	0	0.46	0.2	0	40	0	0	0.11	0.07	0	0	77.11		0	0.451873	0.0233474	0	0.00723766	0	0.0114131	0.0035665	0	0.348068	0	0	0.00137393	0.000920039	0	0		0.493871		0	2.74488	0.141823	0	0.0439649	0	0.0693287	0.0216646	0	2.11433	0
Ciesielczuk-Miedzianka		0	33.22	2.49	0	0.27	0	0.63	0.37	0	39.37	0	0	0.09	0	0	0	76.43		0	0.443332	0.0305974	0	0.00375802	0	0.015631	0.00659802	0	0.342586	0	0	0.00112413	0	0	0		0.493318		0	2.69602	0.186071	0	0.0228535	0	0.0950566	0.0401243	0	2.08336	0
Ciesielczuk-Miedzianka		0	30.8	5.78	0	0.27	0	0.32	0.38	0	38.95	0	0	0.04	0.11	0	0	76.65		0	0.411036	0.0710253	0	0.00375802	0	0.00793958	0.00677635	0	0.338931	0	0	0.000499612	0.00144578	0	0		0.493759		0	2.49739	0.431539	0	0.0228331	0	0.0482396	0.041172	0	2.05929	0
Ciesielczuk-Miedzianka		0	24.56	12.09	0	0.28	0	0.63	0.41	0	39.67	0.01	0	0.09	0.1	0	0	77.86		0	0.327761	0.148563	0	0.0038972	0	0.015631	0.00731132	0	0.345197	0.0001409	0	0.00112413	0.00131434	0	0		0.495853		0	1.98302	0.898836	0	0.0235788	0	0.0945707	0.0442348	0	2.0885	0.000852471
Ciesielczuk-Miedzianka		0	27.38	9.65	0	0.41	0	0.49	0.13	0	39.5	0	0	0.05	0.03	0	0	77.63		0	0.365395	0.11858	0	0.00570662	0	0.0121575	0.00231822	0	0.343717	0	0	0.000624514	0.000394303	0	0		0.50184		0	2.18433	0.708874	0	0.0341142	0	0.0726775	0.0138584	0	2.05474	0
Ciesielczuk-Miedzianka		0	28.7	8	0	0.11	0	0.64	0.27	0	39.07	0	0	0.17	0.07	0	0	77.01		0	0.383011	0.098305	0	0.00153104	0	0.0158792	0.00481477	0	0.339976	0	0	0.00212335	0.000920039	0	0		0.498726		0	2.30394	0.591336	0	0.00920973	0	0.0955183	0.0289624	0	2.04506	0
Ciesielczuk-Miedzianka		0	25.79	11.43	0	0.22	0	0.47	0.07	0	40.23	0.01	0	0.08	0.14	0	0	78.44		0	0.344176	0.140453	0	0.00306209	0	0.0116613	0.00124827	0	0.35007	0.0001409	0	0.000999223	0.00184008	0	0		0.499353		0	2.06773	0.843812	0	0.0183963	0	0.0700583	0.00749936	0	2.10314	0.000846496
Ciesielczuk-Miedzianka		0	32.88	2.48	0	0.21	0	1.17	0.32	0	39.45	0	0	0.07	0.03	0	0	76.61		0	0.438794	0.0304745	0	0.0029229	0	0.0290291	0.0057064	0	0.343282	0	0	0.00087432	0.000394303	0	0		0.501221		0	2.62635	0.182402	0	0.0174947	0	0.17375	0.034155	0	2.05468	0
Ciesielczuk-Miedzianka		0	24.37	11.55	0	0.22	0	1.67	0.35	0	40.04	0.05	0	0.05	0.12	0	0	78.42		0	0.325226	0.141928	0	0.00306209	0	0.0414347	0.00624137	0	0.348416	0.0007045	0	0.000624514	0.00157721	0	0		0.51165		0	1.90692	0.832177	0	0.0179542	0	0.242947	0.0365955	0	2.0429	0.00413075
Ciesielczuk-Miedzianka		0	31.37	5.54	0	0.22	0	0.65	0.19	0	40.71	0	0	0.05	0.15	0	0	78.88		0	0.418643	0.0680762	0	0.00306209	0	0.0161273	0.00338817	0	0.354246	0	0	0.000624514	0.00197151	0	0		0.505908		0	2.48252	0.403687	0	0.018158	0	0.0956335	0.0200916	0	2.10066	0
Ciesielczuk-Miedzianka		0	28.39	5.41	0	0.1	0	0.99	0.11	0	37.31	0	0	0.03	3.3	0	0	75.64		0	0.378874	0.0664787	0	0.00139186	0	0.0245631	0.00196157	0	0.324661	0	0	0.000374709	0.0433733	0	0		0.471308		0	2.41163	0.423155	0	0.00885955	0	0.156351	0.012486	0	2.06655	0
Ciesielczuk-Miedzianka		0	28.1	9.01	0	0.08	0	0.34	0.3	0	38.9	0	0	0.09	0.11	0	0	76.92		0	0.375004	0.110716	0	0.00111349	0	0.0084358	0.00534975	0	0.338496	0	0	0.00112413	0.00144578	0	0		0.495269		0	2.27152	0.670642	0	0.00674474	0	0.0510983	0.0324051	0	2.05038	0
Ciesielczuk-Miedzianka		0	29.03	8.16	0	0	0	0.44	0.33	0	39.83	0	0	0.02	0.11	0	0	77.93		0	0.387415	0.100271	0	0	0	0.0109169	0.00588472	0	0.346589	0	0	0.000249806	0.00144578	0	0		0.498603		0	2.331	0.603312	0	0	0	0.0656851	0.0354073	0	2.08536	0
Ciesielczuk-Miedzianka		0	28.84	7.84	0	0.1	0	0.66	0.28	0	39.61	0	0	0.09	0.06	0	0	77.48		0	0.384879	0.0963389	0	0.00139186	0	0.0163754	0.0049931	0	0.344675	0	0	0.00112413	0.000788605	0	0		0.498985		0	2.31397	0.579209	0	0.00836813	0	0.0984521	0.0300195	0	2.07225	0
Ciesielczuk-Miedzianka		0	27.84	8.63	0	0	0	0.91	0.34	0	40.28	0.02	0	0.07	0.16	0	0	78.25		0	0.371534	0.106046	0	0	0	0.0225782	0.00606305	0	0.350505	0.0002818	0	0.00087432	0.00210295	0	0		0.500159		0	2.2285	0.636077	0	0	0	0.135426	0.0363668	0	2.10236	0.00169026
Ciesielczuk-Miedzianka		0	30.71	4.78	0	0.05	0	0.63	0.26	0	38.74	0.04	0	0	0.22	0	0	75.42		0	0.409835	0.0587372	0	0.000695929	0	0.015631	0.00463645	0	0.337104	0.0005636	0	0	0.00289155	0	0		0.484899		0	2.53559	0.363399	0	0.00430561	0	0.096707	0.028685	0	2.08561	0.00348691
Ciesielczuk-Miedzianka		0	31.9	5.69	0	0.11	0	0.59	0.25	0	39.89	0	0	0.14	0.27	0	0	78.82		0	0.425716	0.0699194	0	0.00153104	0	0.0146386	0.00445812	0	0.347111	0	0	0.00174864	0.00354872	0	0		0.511805		0	2.49538	0.40984	0	0.00897438	0	0.0858057	0.0261318	0	2.03463	0
Ciesielczuk-Miedzianka		0	29.89	6.41	0	0.71	0	0.6	0.12	0	40.18	0	0	0.1	0.14	0	0	78.13		0	0.398892	0.0787669	0	0.00988219	0	0.0148867	0.0021399	0	0.349635	0	0	0.00124903	0.00184008	0	0		0.502428		0	2.38179	0.470318	0	0.0590067	0	0.0888887	0.0127774	0	2.08767	0
Ciesielczuk-Miedzianka		0	31.74	4.84	0	0.43	0	0.41	0.19	0	40.12	0.01	0	0.14	0.31	0	0	78.19		0	0.423581	0.0594745	0	0.00598499	0	0.0101726	0.00338817	0	0.349112	0.0001409	0	0.00174864	0.00407446	0	0		0.499213		0	2.54549	0.35741	0	0.0359666	0	0.0611318	0.0203611	0	2.09798	0.000846733
Ciesielczuk-Miedzianka		0	29.76	6.5	0	0	0	0.41	0.07	0	39.67	0	0	0.19	0.2	0	0	76.79		0	0.397157	0.0798728	0	0	0	0.0101726	0.00124827	0	0.345197	0	0	0.00237315	0.00262868	0	0		0.487202		0	2.44554	0.491825	0	0	0	0.0626388	0.00768638	0	2.12559	0
Ciesielczuk-Miedzianka		0	29.49	5.36	0	0.4	0	0.87	0.13	0	38.65	0.02	0	0.14	0.66	0	0	75.69		0	0.393554	0.0658643	0	0.00556743	0	0.0215857	0.00231822	0	0.336321	0.0002818	0	0.00174864	0.00867466	0	0		0.486571		0	2.42649	0.406093	0	0.0343265	0	0.133089	0.0142932	0	2.07362	0.00173746
Ciesielczuk-Miedzianka		0	29.6	5.22	0	0.27	0	1.06	0.21	0	39.32	0	0	0.04	0.28	0	0	75.99		0	0.395022	0.064144	0	0.00375802	0	0.0262999	0.00374482	0	0.342151	0	0	0.000499612	0.00368016	0	0		0.489224		0	2.42234	0.393342	0	0.0230448	0	0.161275	0.0229639	0	2.09813	0
Ciesielczuk-Miedzianka		0	31.67	4.7	0	0.6	0	0.45	0.12	0	40.26	0.01	0	0.07	0.39	0	0	78.26		0	0.422647	0.0577542	0	0.00835115	0	0.011165	0.0021399	0	0.350331	0.0001409	0	0.00087432	0.00512593	0	0		0.499917		0	2.5363	0.346583	0	0.0501152	0	0.0670013	0.0128415	0	2.10233	0.000845541
Ciesielczuk-Miedzianka		0	31.02	5.79	0	0	0	0.54	0.22	0	40.08	0.03	0	0.1	0.16	0	0	77.94		0	0.413972	0.0711482	0	0	0	0.013398	0.00392315	0	0.348764	0.0004227	0	0.00124903	0.00210295	0	0		0.498518		0	2.49121	0.428158	0	0	0	0.0806272	0.0236089	0	2.09881	0.00254374
Ciesielczuk-Miedzianka		0	31.72	2.66	0	0.22	0	1.44	0.11	0	39.95	0.02	0	0	0	0	0	76.11		0	0.423314	0.0326864	0	0.00306209	0	0.0357281	0.00196157	0	0.347633	0.0002818	0	0	0	0	0		0.49479		0	2.56662	0.198183	0	0.018566	0	0.216626	0.0118934	0	2.10776	0.0017086
Ciesielczuk-Miedzianka		0	30.49	3.36	0	0.08	0	1.48	0.13	0	39.68	0	0	0.06	0.5	0	0	75.77		0	0.406899	0.0412881	0	0.00111349	0	0.0367206	0.00231822	0	0.345284	0	0	0.000749417	0.00657171	0	0		0.486021		0	2.51161	0.254854	0	0.00687307	0	0.22666	0.0143094	0	2.13129	0
Ciesielczuk-Miedzianka		0	3.55	37.7	0	0.15	0	0.35	0.18	0	38.46	0.16	0	0.02	0.05	0	0	80.62		0	0.0473759	0.463262	0	0.00208779	0	0.00868392	0.00320985	0	0.334668	0.0022544	0	0.000249806	0.000657171	0	0		0.52141		0	0.272584	2.66544	0	0.0120124	0	0.0499641	0.0184683	0	1.92555	0.012971
Ciesielczuk-Miedzianka		0	3.53	37.12	0	0.06	0	0.16	0.03	0	37.64	0.06	0	0.02	0.09	0	0	78.71		0	0.047109	0.456135	0	0.000835115	0	0.00396979	0.000534975	0	0.327532	0.0008454	0	0.000249806	0.00118291	0	0		0.508049		0	0.278176	2.69345	0	0.00493131	0	0.0234414	0.003159	0	1.93406	0.00499204
Ciesielczuk-Miedzianka		0	5.49	33.78	0	0.13	0	0.27	0.08	0	39.91	0.18	0	0	0	0	0	79.85		0	0.0732658	0.415093	0	0.00180942	0	0.00669902	0.0014266	0	0.347285	0.0025362	0	0	0	0	0		0.496867		0	0.442367	2.50626	0	0.0109249	0	0.0404476	0.00861357	0	2.09685	0.0153132
Ciesielczuk-Miedzianka		0	28.49	8.39	0	0.16	0	0.3	0.39	0	38.92	0.14	0	0.08	0	0	0	76.88		0	0.380208	0.103097	0	0.00222697	0	0.00744336	0.00695467	0	0.33867	0.0019726	0	0.000999223	0	0	0		0.492976		0	2.31375	0.627398	0	0.0135522	0	0.0452965	0.0423226	0	2.06097	0.0120042
Ciesielczuk-Miedzianka		0	27.77	10.54	0	0.08	0	0.39	0.6	0	40.1	0.1	0	0.07	0.06	0	0	79.7		0	0.3706	0.129517	0	0.00111349	0	0.00967636	0.0106995	0	0.348938	0.001409	0	0.00087432	0.000788605	0	0		0.510906		0	2.17613	0.760512	0	0.0065383	0	0.0568188	0.0628266	0	2.04894	0.00827353
Ciesielczuk-Miedzianka		0	29.99	7.56	0	0.2	0	0.46	0.46	0	39.99	0.25	0	0.12	0.35	0	0	79.39		0	0.400226	0.0928982	0	0.00278372	0	0.0114131	0.00820295	0	0.347981	0.0035225	0	0.00149883	0.0046002	0	0		0.507321		0	2.3667	0.549345	0	0.0164613	0	0.0674906	0.0485074	0	2.05776	0.02083
Ciesielczuk-Miedzianka		0	25.98	9.3	0	1.48	0	1.81	0.26	0	37.22	0.04	0	0.1	2.69	0	0	78.88		0	0.346712	0.11428	0	0.0205995	0	0.0449082	0.00463645	0	0.323877	0.0005636	0	0.00124903	0.0353558	0	0		0.526499		0	1.97557	0.651167	0	0.117376	0	0.255888	0.0264186	0	1.84546	0.0032114
Ciesielczuk-Miedzianka		0	27.54	9.36	0	0.33	0	0.62	0.27	0	38.68	0.04	0	0.07	0.91	0	0	77.81		0	0.36753	0.115017	0	0.00459313	0	0.0153829	0.00481477	0	0.336582	0.0005636	0	0.00087432	0.0119605	0	0		0.502523		0	2.19411	0.686636	0	0.0274204	0	0.0918342	0.0287436	0	2.00935	0.00336462
Ciesielczuk-Miedzianka		0	27.98	7.49	0	0.33	0	0.39	0.4	0	38.66	0.08	0	0.05	0.41	0	0	75.78		0	0.373402	0.092038	0	0.00459313	0	0.00967636	0.007133	0	0.336408	0.0011272	0	0.000624514	0.0053888	0	0		0.47971		0	2.33518	0.575586	0	0.0287244	0	0.0605139	0.0446082	0	2.10382	0.00704926
Ciesielczuk-Miedzianka		0	27.04	9.25	0	1.8	0	0.15	0.33	0	39.51	0.04	0	0.07	0.06	0	0	78.26		0	0.360858	0.113665	0	0.0250534	0	0.00372168	0.00588472	0	0.343804	0.0005636	0	0.00087432	0.000788605	0	0		0.503298		0	2.15096	0.677522	0	0.149336	0	0.0221837	0.035077	0	2.04931	0.00335944
Ciesielczuk-Miedzianka		0	23.46	15.48	0	0.2	0	0.25	0.12	0	40.17	0.08	0	0.11	0	0	0	79.86		0	0.313081	0.19022	0	0.00278372	0	0.0062028	0.0021399	0	0.349548	0.0011272	0	0.00137393	0	0	0		0.512288		0	1.83343	1.11394	0	0.0163017	0	0.0363241	0.0125314	0	2.04698	0.00660098
Ciesielczuk-Miedzianka		0	17.05	23.08	0	0.18	0	0.24	0.09	0	37.05	0.06	0	0.11	0.15	0	0	78.01		0	0.227538	0.28361	0	0.00250534	0	0.00595468	0.00160492	0	0.322398	0.0008454	0	0.00137393	0.00197151	0	0		0.519608		0	1.31371	1.63745	0	0.0144648	0	0.0343799	0.00926617	0	1.86139	0.00488099
Ciesielczuk-Miedzianka		0.03	14.86	21.63	0.32	0.14	3.31	0	0.05	0	38.59	0.08	0	0.23	0	0	0	79.25		0.000401645	0.198312	0.265792	0.00451102	0.0019486	0.0416115	0	0.000891625	0	0.335799	0.0011272	0	0.00287277	0	0	0		0.512576		0.00235074	1.16068	1.55562	0.026402	0.0114047	0.243543	0	0.00521849	0	1.96536	0.00659726
Ciesielczuk-Miedzianka		0.19	29.17	7.83	0.13	0.11	0.74	0	0.25	0	40.79	0.26	0	0.14	0	0	0	79.62		0.00254375	0.389283	0.096216	0.0018326	0.00153104	0.00930286	0	0.00445812	0	0.354943	0.0036634	0	0.00174864	0	0	0		0.500709		0.0152409	2.33239	0.576478	0.01098	0.00917325	0.0557381	0	0.0267108	0	2.12664	0.0219493
Ciesielczuk-Miedzianka		0.31	29.2	8.65	0.24	0.07	0.83	0	0.33	0	40.94	0.2	0	0.19	0	0	0	80.95		0.00415033	0.389684	0.106292	0.00338326	0.000974301	0.0104343	0	0.00588472	0	0.356248	0.002818	0	0.00237315	0	0	0		0.514918		0.0241805	2.27036	0.619277	0.0197115	0.00567644	0.060792	0	0.0342854	0	2.07556	0.0164182
Ciesielczuk-Miedzianka		0.16	28.89	9	0.48	0.16	0.5	0	0.19	0	40.32	0.26	0	0.26	0	0	0	80.23		0.00214211	0.385547	0.110593	0.00676653	0.00222697	0.00628572	0	0.00338817	0	0.350853	0.0036634	0	0.00324748	0	0	0		0.513561		0.0125133	2.2522	0.646037	0.0395271	0.013009	0.0367184	0	0.0197922	0	2.04953	0.0214
Ciesielczuk-Miedzianka		0.61	35.08	0.34	0.42	0	0	0	1.2	0	42.79	0	0	0.13	0	0	0	80.56		0.00816678	0.468154	0.00417796	0.00592071	0	0	0	0.021399	0	0.372346	0	0	0.00162374	0	0	0		0.48642		0.0503688	2.88735	0.0257676	0.0365161	0	0	0	0.131979	0	2.29645	0
Ciesielczuk-Miedzianka		0	27.08	16.39	0	0.05	0.78	0	0.25	0	43.64	0.21	0	0.2	0.02	0	0	88.62		0	0.361391	0.201402	0	0.000695929	0.00980572	0	0.00445812	0	0.379742	0.0029589	0	0.00249806	0.000262868	0	0		0.573295		0	1.89113	1.05392	0	0.00364173	0.0513124	0	0.0233289	0	1.98716	0.0154836
Ciesielczuk-Miedzianka		0	13.14	30.93	0	0.13	1.5	0	0.17	0	42.55	0.17	0	0.05	0	0	0	88.64		0	0.175358	0.380072	0	0.00180942	0.0188572	0	0.00303152	0	0.370258	0.0023953	0	0.000624514	0	0	0		0.576096		0	0.913169	1.97921	0	0.00942247	0.098198	0	0.0157866	0	1.9281	0.0124735
Ciesielczuk-Miedzianka		0	27.68	15.42	0	0.06	0.43	0	0.22	0	40.86	0.39	0	0.25	0.01	0	0	85.32		0	0.369399	0.189483	0	0.000835115	0.00540572	0	0.00392315	0	0.355552	0.0054951	0	0.00312257	0.000131434	0	0		0.565122		0	1.96098	1.00589	0	0.00443328	0.0286967	0	0.0208264	0	1.88748	0.0291712
Ciesielczuk-Miedzianka		0	12.93	30.69	0	0.11	1.12	0	0.1	0	41.84	0.14	0	0.1	0.08	0	0	87.16		0	0.172555	0.377122	0	0.00153104	0.01408	0	0.00178325	0	0.364079	0.0019726	0	0.00124903	0.00105147	0	0		0.565289		0	0.915754	2.0014	0	0.00812529	0.0747229	0	0.00946375	0	1.93218	0.0104686
[truncated: 6 more columns]
