# Supplementary material for: Thermodynamics of vivianite-group arsenates M3(AsO4)2 ⋅ 8H2O (M is Ni, Co, Mg, Zn, Cu) and chemical variability in the natural arsenates of this group
Source: Copernicus journal article supplement (doi:10.5194/ejm-36-31-2024), 2024-01-08
Supplement: Supplementary file 2 [file annabergite-SI.xlsx]

## Sheet: Cp
So (2-298 K)	sigma-So		measured:	2022-02-01
(J/mol.K)	(J/mol.K)
513.4	3.5938
Annabergite			Annabergite
sample wt	9.98	g	sample wt	9.98	g
Molar wt	598.042	g/mol	Molar wt	598.042	g/mol
mean of 3 meas per T = 60 data			detail around Cp-anomaly at 8 K
PPMS1-mean			PPMS2
T	Cp	sigma-Cp	T	Cp	sigma-Cp
(K)	(J/mol.K)	(J/mol.K)	(K)	(J/mol.K)	(J/mol.K)
2.35043	2.32567	0.0322504	5.22031	12.5538	0.172933
2.53577	2.8773	0.0350496	5.45865	13.4722	0.183161
2.73653	3.51135	0.0373872	5.69437	14.4545	0.192819
2.95294	4.22154	0.0389959	5.92826	15.5465	0.205707
3.18748	5.01271	0.0402534	6.16312	16.7812	0.218758
3.44601	5.96168	0.0437426	6.39944	18.212	0.233944
3.72326	7.02778	0.0456028	6.63486	19.8445	0.255641
4.02498	8.21526	0.0459935	6.87803	21.7207	0.267959
4.3544	9.48946	0.0446442	7.13316	24.0878	0.301244
4.71198	10.8082	0.0439014	7.32665	25.9635	0.326449
5.10043	12.1954	0.0444928	7.56009	28.2673	0.357883
5.52929	13.7896	0.0479411	7.79142	30.0953	0.398458
5.99277	15.8421	0.057066	8.02078	30.618	0.415851
6.49838	18.7583	0.0709986	8.25026	29.1502	0.419512
7.05836	23.1138	0.0932598	8.48182	25.8878	0.386978
7.61615	28.3477	0.0934343	8.71956	21.9568	0.32358
8.27126	28.1538	0.104918	8.96016	19.0694	0.26618
8.985	18.5551	0.075521	9.20079	17.2846	0.230812
9.76766	15.099	0.0365715	9.43929	16.1924	0.210882
10.6141	13.5232	0.031014	9.67742	15.4427	0.200824
11.5422	12.3154	0.027599	9.91484	14.8542	0.192828
12.5388	11.4141	0.0254695	10.1522	14.3311	0.1858
13.6271	10.7608	0.0249943	10.3912	13.8955	0.176376
14.811	10.2946	0.024973	10.6281	13.4984	0.168504
16.0871	10.1492	0.0265088	10.8654	13.1564	0.165318
17.4968	10.2542	0.0303798	11.104	12.8226	0.158708
19.0338	10.7501	0.0358273	11.3408	12.5105	0.153406
20.6903	11.5216	0.0443465	11.5794	12.219	0.149234
22.4935	12.7042	0.0457069	11.8155	11.9476	0.144537
24.4496	14.2717	0.0492894	12.0565	11.7173	0.141684
26.5777	16.4036	0.0595511	12.2937	11.5117	0.140375
28.8904	19.0594	0.0841269	12.5323	11.3081	0.13464
31.4084	22.4572	0.0848858	12.7704	11.1547	0.134883
34.1521	26.692	0.103996	13.0048	10.993	0.134179
37.1273	31.9266	0.12515
40.367	37.894	0.147304
43.901	45.1003	0.178115
47.7445	53.7729	0.211803
51.9192	63.6771	0.239492
56.4601	74.7262	0.27351
61.4067	87.6422	0.316463
66.7823	101.716	0.366943
72.6447	117.986	0.418168
79.0021	135.415	0.470349
85.9121	154.624	0.530074
93.4349	174.598	0.592166
101.622	194.88	0.654213
110.533	214.271	0.825791
120.187	237.12	0.775712
130.738	260.719	0.794065
142.216	283.828	0.8442
154.726	307.586	0.890922
168.32	333.725	0.966019
183.054	360.53	1.02453
199.116	388.097	1.07532
216.578	417.365	1.1605
235.552	447.352	1.218
256.208	478.004	1.30392
278.678	512.313	1.49765
303.145	542.486	1.47758

## Sheet: S
FUNCTION FIT
T	Cp	H	dH/T	S	G	'-G/T
K	J/K	J	J/K	J/K	J	J/K
0	0	0	NaN	0	0	NaN
5	11.81	21.08	4.216	7.098	-14.41	2.882
10	14.54	122.2	12.22	20.79	-85.73	8.573
15	10.18	180.6	12.04	25.58	-203.2	13.55
20	11.13	232.7	11.64	28.58	-338.8	16.94
25	14.79	296.5	11.86	31.41	-488.7	19.55
30	20.59	384.1	12.8	34.59	-653.5	21.78
35	28.13	505.3	14.44	38.31	-835.5	23.87
40	37.17	667.9	16.7	42.64	-1038	25.94
45	47.48	879	19.53	47.6	-1263	28.07
50	58.87	1145	22.89	53.18	-1515	30.29
55	71.11	1469	26.71	59.36	-1796	32.65
60	84	1857	30.94	66.1	-2109	35.15
65	97.32	2310	35.54	73.34	-2458	37.81
70	110.9	2830	40.43	81.05	-2843	40.62
75	124.6	3419	45.58	89.17	-3269	43.58
80	138.2	4076	50.95	97.64	-3736	46.7
85	151.7	4801	56.48	106.4	-4246	49.95
90	165.3	5594	62.15	115.5	-4800	53.34
95	178.2	6452	67.92	124.8	-5401	56.85
100	190.7	7374	73.74	134.2	-6048	60.48
110	214.4	9401	85.47	153.5	-7487	68.06
120	236.9	11660	97.16	173.2	-9120	76
130	258.2	14130	108.7	193	-10950	84.24
140	278.8	16820	120.1	212.9	-12980	92.71
150	298.8	19710	131.4	232.8	-15210	101.4
160	318.2	22790	142.5	252.7	-17640	110.2
170	337	26070	153.4	272.5	-20260	119.2
180	355.3	29530	164.1	292.3	-23090	128.3
190	372.9	33170	174.6	312	-26110	137.4
200	389.9	36990	184.9	331.6	-29330	146.6
210	406.3	40970	195.1	351	-32740	155.9
220	422.4	45110	205.1	370.3	-36340	165.2
230	438.2	49420	214.9	389.4	-40140	174.5
240	453.8	53880	224.5	408.4	-44130	183.9
250	469.3	58490	234	427.2	-48310	193.2
260	484.6	63260	243.3	445.9	-52680	202.6
270	499.5	68180	252.5	464.5	-57230	212
273.15	504.1	69760	255.4	470.3	-58700	214.9
280	513.8	73250	261.6	482.9	-61960	221.3
290	527	78450	270.5	501.2	-66890	230.6
298.15	536.9	82790	277.7	515.9	-71030	238.2
300	539	83790	279.3	519.2	-71990	240
