# Supplementary material for: Thermodynamics of vivianite-group arsenates M3(AsO4)2 ⋅ 8H2O (M is Ni, Co, Mg, Zn, Cu) and chemical variability in the natural arsenates of this group
Source: Copernicus journal article supplement (doi:10.5194/ejm-36-31-2024), 2024-01-08
Supplement: Supplementary file 3 [file erythrite-SI.xlsx]

## Sheet: Cp
So (2-298 K)	sigma-So		measured:	2022-02-01
(J/mol.K)	(J/mol.K)
536.8	3.7576
Erythrite			Erythrite
sample wt	7.03	g	sample wt	7.03	g
Molar wt	598.761	g/mol	Molar wt	598.761	g/mol
mean of 3 meas per T = 60 data			detail around Cp-anomaly at 7 K (note that there ist als a broad anomaly at 2 K)
PPMS1-mean			PPMS2
T	Cp	sigma-Cp	T	Cp	sigma-Cp
(K)	(J/mol.K)	(J/mol.K)	(K)	(J/mol.K)	(J/mol.K)
2.34515	3.6101	0.0240699	5.25951	5.90789	0.0449963
2.53375	3.68483	0.0214436	5.48261	6.90923	0.0561564
2.7375	3.69073	0.0198948	5.7026	8.17278	0.0699813
2.95724	3.6438	0.0186107	5.92077	9.8081	0.0871542
3.19585	3.57131	0.0175805	6.14024	11.883	0.108755
3.45809	3.53621	0.0170408	6.3586	14.4883	0.133234
3.73949	3.5485	0.0171191	6.57434	17.5865	0.152668
4.04795	3.65265	0.0183439	6.78335	20.6353	0.138091
4.38422	3.91234	0.0211783	7.00846	21.1691	0.104147
4.74756	4.44982	0.0280781	7.23548	17.4739	0.150473
5.1446	5.48737	0.040394	7.38715	15.3739	0.105301
5.58003	7.41716	0.0620149	7.61273	13.6746	0.0696058
6.04119	10.8722	0.0958648	7.83222	12.8642	0.0568022
6.55303	17.1789	0.144396	8.05285	12.3369	0.0528655
7.1227	19.1926	0.15339	8.27235	11.9267	0.050132
7.65939	13.2969	0.0499211	8.49341	11.581	0.0490425
8.32553	11.7139	0.0353299	8.70984	11.2554	0.0468011
9.04209	10.6698	0.0321178	8.93107	10.9369	0.0452209
9.82187	9.6648	0.0294992	9.14648	10.6366	0.0450284
10.6694	8.74209	0.0274968	9.36578	10.3437	0.0437579
11.6119	7.89391	0.0250243	9.58681	10.0731	0.0443916
12.6042	7.33487	0.0250292	9.80582	9.80437	0.04355
13.7138	7.0495	0.0266697	10.0306	9.53125	0.0410943
14.9025	6.87614	0.0272161
16.1852	7.07796	0.0308926
17.5842	7.57186	0.0356988
19.1404	8.36562	0.041637
20.7856	9.57012	0.0530946
22.5807	11.0363	0.0560346
24.5494	13.187	0.0622993
26.6817	15.8813	0.0792298
29.0116	19.2507	0.0995235
31.5321	23.395	0.118632
34.2783	28.6191	0.150136
37.251	34.9395	0.175323
40.5094	42.314	0.211184
44.0449	50.9279	0.256919
47.8881	61.3587	0.326981
52.0687	72.8686	0.379143
56.5881	87.388	0.400775
61.5606	102.71	0.460062
66.9338	118.973	0.528375
72.7819	136.943	0.637122
79.1411	156.135	0.815418
86.052	176.888	0.892687
93.5893	197.704	0.960765
101.795	217.617	1.12251
110.7	239.585	1.1763
120.288	258.049	1.08013
130.84	281.433	1.13135
142.32	304.051	1.21589
154.819	326.821	1.27553
168.428	352.9	1.36478
183.146	378.316	1.43206
199.181	405.513	1.53343
216.628	433.592	1.63633
235.58	461.396	1.7048
256.217	491.835	1.83867
278.667	525.71	2.07353
303.17	553.629	2.05883

## Sheet: S
FUNCTION FIT
T	Cp	H	dH/T	S	G	'-G/T
K	J/K	J	J/K	J/K	J	J/K
0	0	0	NaN	0	0	NaN
5	5.081	14.35	2.87	6.461	-17.95	3.59
10	9.514	75.01	7.501	14.76	-72.6	7.26
15	6.904	113.4	7.557	17.91	-155.2	10.35
20	8.916	151.5	7.573	20.09	-250.2	12.51
25	13.79	207.2	8.289	22.55	-356.6	14.26
30	20.87	293	9.768	25.66	-476.9	15.9
35	29.93	419.2	11.98	29.54	-614.5	17.56
40	40.86	595.5	14.89	34.23	-773.6	19.34
45	53.47	830.7	18.46	39.75	-958.2	21.29
50	67.44	1132	22.65	46.1	-1172	23.45
55	82.35	1507	27.39	53.22	-1420	25.83
60	97.78	1957	32.61	61.04	-1706	28.43
65	113.3	2485	38.23	69.49	-2032	31.26
70	128.7	3090	44.14	78.45	-2402	34.31
75	143.8	3771	50.29	87.85	-2817	37.56
80	158.5	4527	56.59	97.6	-3281	41.01
85	172.9	5356	63.01	107.6	-3794	44.63
90	187.1	6256	69.51	117.9	-4358	48.42
95	200.9	7227	76.07	128.4	-4973	52.35
100	213.7	8264	82.64	139.1	-5642	56.42
110	237	10520	95.63	160.5	-7140	64.91
120	258.7	13000	108.3	182.1	-8853	73.77
130	279.3	15690	120.7	203.6	-10780	82.93
140	299.1	18580	132.7	225	-12920	92.32
150	318.3	21670	144.5	246.3	-15280	101.9
160	337	24950	155.9	267.5	-17850	111.6
170	355.3	28410	167.1	288.5	-20630	121.4
180	373.1	32050	178.1	309.3	-23620	131.2
190	390.3	35870	188.8	329.9	-26820	141.1
200	407	39860	199.3	350.4	-30220	151.1
210	423	44010	209.6	370.6	-33820	161.1
220	438.4	48310	219.6	390.6	-37630	171
230	453.4	52770	229.4	410.5	-41640	181
240	468	57380	239.1	430.1	-45840	191
250	482.6	62130	248.5	449.5	-50240	200.9
260	497.5	67030	257.8	468.7	-54830	210.9
270	512.6	72080	267	487.7	-59610	220.8
273.15	517.4	73710	269.8	493.7	-61150	223.9
280	527.7	77280	276	506.7	-64580	230.6
290	541.6	82630	284.9	525.4	-69740	240.5
298.15	550.3	87080	292.1	540.6	-74090	248.5
300	551.8	88100	293.7	544	-75090	250.3
