# Supplementary material for: Thermodynamics of vivianite-group arsenates M3(AsO4)2 ⋅ 8H2O (M is Ni, Co, Mg, Zn, Cu) and chemical variability in the natural arsenates of this group
Source: Copernicus journal article supplement (doi:10.5194/ejm-36-31-2024), 2024-01-08
Supplement: Supplementary file 4 [file hoernesite-SI.xlsx]

## Sheet: Cp
So (2-298 K)	sigma-So		measured:	2022-02-01
(J/mol.K)	(J/mol.K)
475.5	3.3285
Hörnesite
sample wt	5.95	g
Molar wt	494.877	g/mol
mean of 3 meas per T = 60 data
PPMS1-mean
T	Cp	sigma-Cp
(K)	(J/mol.K)	(J/mol.K)
2.33119	0.0180196	0.000990257
2.52248	0.0210389	0.00105763
2.72798	0.0242187	0.00113953
2.94848	0.0277908	0.00123298
3.18498	0.0318013	0.00137314
3.44502	0.0400489	0.0017521
3.72718	0.0512716	0.00204096
4.03303	0.0621036	0.00220094
4.36566	0.0736989	0.00237266
4.7259	0.0888437	0.00266747
5.11765	0.108685	0.00245524
5.54854	0.133893	0.00369714
6.01817	0.167778	0.00423699
6.54766	0.217681	0.00473133
7.11215	0.277367	0.00566959
7.66758	0.346791	0.00692126
8.32227	0.446506	0.00807616
9.03055	0.570806	0.0100591
9.81679	0.738348	0.0120855
10.6691	0.956852	0.0153546
11.5924	1.22608	0.0186153
12.6179	1.56254	0.0226233
13.7081	2.09423	0.0326617
14.8974	2.55875	0.0341395
16.1886	3.22758	0.0402185
17.5766	4.07732	0.0502019
19.1267	5.14548	0.0617095
20.8088	6.22131	0.0460766
22.587	7.67995	0.0507299
24.5656	9.64061	0.0618786
26.6894	11.8705	0.0762772
29.0082	14.5846	0.092319
31.5342	18.003	0.111324
34.2818	22.1652	0.137636
37.2622	27.1997	0.165208
40.5054	32.9856	0.19892
44.0467	40.0175	0.238578
47.8938	48.5537	0.293214
52.0708	58.1788	0.321409
56.6202	68.8651	0.37723
61.5851	81.9214	0.449356
66.9705	96.1521	0.504842
72.8201	112.059	0.596462
79.175	129.649	0.679746
86.0935	148.14	0.758593
93.6174	168.806	0.903792
101.809	187.95	0.99026
110.694	209.432	1.03378
120.334	230.017	1.12144
130.885	253.966	1.17717
142.382	277.394	1.2367
154.882	301.641	1.32942
168.417	328.919	1.41985
183.175	355.618	1.5128
199.227	385.435	1.63616
216.68	415.791	1.80454
235.633	446.021	1.82045
256.273	477.21	1.93267
278.716	511.191	2.18737
303.193	539.836	2.29079

## Sheet: S
FUNCTION FIT
T	Cp	H	dH/T	S	G	'-G/T
K	J/K	J	J/K	J/K	J	J/K
0	0	0	NaN	0	0	NaN
5	0.1007	0.154	0.0308	0.05197	-0.1059	0.02117
10	0.7849	1.984	0.1984	0.2798	-0.8134	0.08134
15	2.629	9.968	0.6645	0.9023	-3.566	0.2377
20	5.671	30.26	1.513	2.049	-10.72	0.536
25	10.03	68.91	2.756	3.756	-24.99	0.9994
30	15.9	133.1	4.437	6.08	-49.31	1.644
35	23.28	230.4	6.584	9.067	-86.89	2.483
40	32.08	368.3	9.207	12.73	-141.1	3.528
45	42.12	553.3	12.3	17.08	-215.4	4.786
50	53.23	791.3	15.83	22.09	-313	6.26
55	65.2	1087	19.76	27.71	-437.3	7.95
60	77.84	1444	24.07	33.93	-591.1	9.852
65	90.97	1866	28.71	40.67	-777.4	11.96
70	104.4	2355	33.64	47.9	-998.7	14.27
75	118	2911	38.81	55.57	-1257	16.76
80	131.6	3535	44.18	63.62	-1555	19.44
85	145.1	4226	49.72	72	-1894	22.28
90	158.4	4985	55.39	80.68	-2276	25.28
95	171.4	5810	61.16	89.59	-2701	28.43
100	184.1	6699	66.99	98.71	-3172	31.72
110	208.1	8662	78.74	117.4	-4252	38.65
120	230.4	10860	90.46	136.5	-5521	46.01
130	251.5	13260	102	155.7	-6982	53.71
140	272.5	15890	113.5	175.2	-8636	61.69
150	292.7	18710	124.7	194.6	-10490	69.9
160	312.3	21740	135.9	214.2	-12530	78.31
170	331.3	24960	146.8	233.7	-14770	86.87
180	350	28360	157.6	253.1	-17200	95.57
190	368.4	31960	168.2	272.6	-19830	104.4
200	386.6	35730	178.7	291.9	-22650	113.3
210	404.3	39690	189	311.2	-25670	122.2
220	421.4	43810	199.2	330.4	-28880	131.3
230	437.6	48110	209.2	349.5	-32280	140.3
240	452.9	52560	219	368.5	-35870	149.4
250	467.7	57170	228.7	387.3	-39650	158.6
260	482.5	61920	238.1	405.9	-43610	167.7
270	497.6	66820	247.5	424.4	-47760	176.9
273.15	502.5	68390	250.4	430.2	-49110	179.8
280	513.3	71870	256.7	442.8	-52100	186.1
290	528.3	77080	265.8	461	-56620	195.2
298.15	537.5	81430	273.1	475.8	-60440	202.7
300	538.7	82420	274.7	479.1	-61320	204.4
