# Supplementary material for: Thermodynamics of vivianite-group arsenates M3(AsO4)2 ⋅ 8H2O (M is Ni, Co, Mg, Zn, Cu) and chemical variability in the natural arsenates of this group
Source: Copernicus journal article supplement (doi:10.5194/ejm-36-31-2024), 2024-01-08
Supplement: Supplementary file [file ejm-36-31-2024-supplement-title-page.pdf › ejm-36-31-2024-supplement-title-page.pdf]

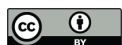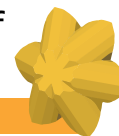

*Supplement of*

**Thermodynamics of vivianite-group arsenates  $M_3(\text{AsO}_4)_2 \cdot 8\text{H}_2\text{O}$   
( $M$  is Ni, Co, Mg, Zn, Cu) and chemical variability in the  
natural arsenates of this group**

**Juraj Majzlan et al.**

*Correspondence to:* Juraj Majzlan ([juraj.majzlan@uni-jena.de](mailto:juraj.majzlan@uni-jena.de))

- [ejm-36-31-2024-supplement-title-page.pdf](#)
- [EMP-all-data.xlsx](#)
- [FTIR-Co-Mg-series.zip](#)
- [FTIR-Co-Ni-series.zip](#)
- [FTIR-Ni-Mg-series.zip](#)
- [annabergite-SI.xlsx](#)
- [annabergite-TG-DTA.txt](#)
- [erythrite-SI.xlsx](#)
- [erythrite-TG-DTA.txt](#)
- [figures-SI.pdf](#)
- [hoernesite-SI.xlsx](#)
- [hoernesite-TG-DTA.txt](#)

The copyright of individual parts of the supplement might differ from the article licence.
